# Supplementary material for: [Ni30S16(PEt3)11]: an open-shell nickel sulfide nanocluster with a “metal-like” core
Source: Royal Society of Chemistry journal article supplement (doi:10.1039/d2sc00960a), 2022-01-01
Supplement: d2sc00960a1.pdf [file d2sc00960a1.pdf]

Supporting Information for:

**[Ni<sub>30</sub>S<sub>16</sub>(PEt<sub>3</sub>)<sub>11</sub>]: An Open-shell Nickel Sulfide Nanocluster with a “Metal-like”  
Core**

Alexander J. Touchton, Guang Wu, Trevor W. Hayton\*

*Department of Chemistry and Biochemistry, University of California, Santa Barbara,  
California 93106, United States*

\*[hayton@chem.ucsb.edu](mailto:hayton@chem.ucsb.edu)

## Table of Contents

---

|                                                                                                                                                                                                                                                                                                                   |     |
|-------------------------------------------------------------------------------------------------------------------------------------------------------------------------------------------------------------------------------------------------------------------------------------------------------------------|-----|
| Experimental Details                                                                                                                                                                                                                                                                                              | S3  |
| X-ray Crystallographic Data                                                                                                                                                                                                                                                                                       | S12 |
| Spectral Data                                                                                                                                                                                                                                                                                                     | S20 |
| <i>In Situ</i> Monitoring of the reaction of [Ni(1,5-cod) <sub>2</sub> ] with<br>PEt <sub>3</sub> (1.5 equiv) and S <sub>8</sub> (0.06 equiv)                                                                                                                                                                     | S20 |
| Spectral characterization of [Ni <sub>30</sub> S <sub>16</sub> (PEt <sub>3</sub> ) <sub>11</sub> ] ( <b>1</b> )                                                                                                                                                                                                   | S31 |
| Spectral characterization of [Ni <sub>26</sub> S <sub>14</sub> (PEt <sub>3</sub> ) <sub>10</sub> ] ( <b>2</b> )                                                                                                                                                                                                   | S45 |
| <i>In situ</i> <sup>31</sup> P{ <sup>1</sup> H} NMR Spectrum of low temperature<br>thermolysis                                                                                                                                                                                                                    | S52 |
| Magnetism Data for [Ni <sub>30</sub> S <sub>16</sub> (PEt <sub>3</sub> ) <sub>11</sub> ] ( <b>1</b> )                                                                                                                                                                                                             | S53 |
| Reactivity of [Ni <sub>30</sub> S <sub>16</sub> (PEt <sub>3</sub> ) <sub>11</sub> ] ( <b>1</b> ) with Air                                                                                                                                                                                                         | S59 |
| ORTEP Structures of [Ni <sub>30</sub> S <sub>16</sub> (PEt <sub>3</sub> ) <sub>11</sub> ].OC <sub>4</sub> H <sub>10</sub> ( <b>1</b> ·Et <sub>2</sub> O) and<br>[Ni <sub>26</sub> S <sub>14</sub> (PEt <sub>3</sub> ) <sub>10</sub> ].C <sub>5</sub> H <sub>12</sub> ( <b>2</b> ·C <sub>5</sub> H <sub>12</sub> ) | S61 |
| References                                                                                                                                                                                                                                                                                                        | S63 |

---

## Experimental Details

All reactions and subsequent manipulations were performed under anaerobic and anhydrous conditions in the glovebox under an atmosphere of dinitrogen, unless otherwise noted. Tetrahydrofuran (THF) was distilled twice, first from calcium hydride and then from sodium benzophenone ketyl and stored over 3 Å molecular sieves for 24 h prior to use. 1,2-dimethoxyethane (DME) was distilled from sodium benzophenone ketyl and stored over 3 Å molecular sieves for 24 h prior to use. Hexanes, diethyl ether, and toluene were dried by passage over activated molecular sieves using a Vacuum Atmospheres DRI-SOLV solvent purification system and stored over 3 Å molecular sieves for 24 h prior to use. Pentane and methylene chloride were dried on an MBraun solvent purification system and stored over activated 3 Å molecular sieves for 24 h prior to use. Acetonitrile was dried over activated 3 Å molecular sieves for 24 h, degassed by bubbling dry N<sub>2</sub> into the solvent for 30 min, cannula transferred into a new vessel, and dried again over 3 Å molecular sieves for 24 h prior to use. Benzene-*d*<sub>6</sub> and toluene-*d*<sub>8</sub> were purchased from Cambridge Isotope Laboratories and dried over activated 3 Å molecular sieves for 24 h prior to use. *Bis*(1,5-cyclooctadiene)nickel(0) (98+%) was purchased from Strem Chemicals and used as received. Triethylphosphine, 99%, was purchased from Sigma-Aldrich and used as received. All other reagents were used as received.

NMR spectra were collected at 25 °C unless otherwise noted. <sup>1</sup>H, <sup>13</sup>C{<sup>1</sup>H}, and <sup>31</sup>P{<sup>1</sup>H} NMR spectra were recorded on a Bruker Avance NEO 500 MHz spectrometer. <sup>1</sup>H and <sup>13</sup>C{<sup>1</sup>H} NMR spectra were referenced to external SiMe<sub>4</sub> using the residual protio solvent resonances as internal standards.<sup>1, 2</sup> <sup>31</sup>P{<sup>1</sup>H} NMR spectra were

referenced indirectly to the  $^1\text{H}$  chemical shift of  $\text{SiMe}_4$  at 0 ppm.<sup>1,2</sup> Mass spectra were collected at the Materials Research Laboratory Shared Experimental Facilities at the University of California, Santa Barbara, using an electrospray ionization (ESI) source in positive ion mode with a Waters Xevo G2-XS TOF Time-of-Flight mass spectrometer. Model mass spectra were generated in MassLynx V4.1 software with the isotope clusters displayed with a minimum abundance of 0.1%. IR spectra were recorded on a Nicolet 6700 FT-IR spectrometer. Elemental analyses were performed by the Micro-Mass Facility at the University of California, Berkeley.

**Magnetism Measurements.** Magnetic properties were recorded using a Quantum Design Magnetic Property Measurement 5XL Super Conducting Quantum Interference Device (MPMS 5XL SQUID) magnetometer. All loading equipment, including quartz wool and borosilicate glass NMR tubes, were oven-dried at 120 °C for 24 h prior to use. Complex **1** (18.0 mg, 0.00504 mmol) was sandwiched between two plugs of high purity quartz wool (72.4 mg total) in a 5 mm borosilicate glass NMR tube that was flame-sealed at one end, and tightly packed to a length of  $\sim 2$  cm. Nitrile gloves were worn over glovebox gloves during sample loading, and contact with quartz wool was minimized to prevent contamination. A vacuum adaptor was attached to the open end of the borosilicate glass NMR tube, and the sample was subsequently flame-sealed under static vacuum. The experiments for complex **1** were performed between 2 and 300 K at an applied field of 10,000 Oe. Diamagnetic correction was made using Pascal's constants ( $\chi_{\text{dia}} = -2.02945 \times 10^{-3} \text{ cm}^3 \cdot \text{mol}^{-1}$ ).<sup>3</sup> Data were not corrected for the contribution of the straw sample holder, borosilicate glass NMR tube, or quartz wool.

**Synthesis of  $[\text{Ni}_{30}\text{S}_{16}(\text{PEt}_3)_{11}]$  (1).** A 20 mL scintillation vial equipped with a magnetic stir bar was charged with  $[\text{Ni}(1,5\text{-cod})_2]$  (0.5153 g, 1.873 mmol), toluene (5 mL), and triethylphosphine (0.42 mL, 2.9 mmol). To this solution was added a suspension of  $\text{S}_8$  (0.0300 g, 0.117 mmol) in toluene (2 mL), which resulted in an immediate color change to dark brown. Additional portions of toluene ( $2 \times 1$  mL) were used to transfer all of the  $\text{S}_8$ . After stirring for 5 min, the reaction mixture was pipetted into a 50 mL Cajon flask equipped with a Teflon rototflow valve. Additional portions of toluene ( $3 \times 1.5$  mL) were used to transfer all the residue from the vial to the flask; the stir bar was also added to the flask. The flask was sealed and removed from the glovebox, whereupon the solution was heated in an oil bath at 115 °C for 16 h with stirring. After 16 h, the flask was brought back into the glovebox and transferred to a 20 mL scintillation vial. The volatiles were removed in vacuo to provide a brown solid. The solid was then rinsed with acetonitrile (10 mL) and the rinsings (containing the majority of the  $\text{Et}_3\text{PS}$ ) were discarded. The remaining undissolved solid was dried *in vacuo*, dissolved in a mixture of THF and hexanes (5 mL THF/5 mL hexanes), and filtered through a Celite column supported on glass wool (0.5 cm  $\times$  5 cm) to provide a deep brown filtrate. Additional portions of THF/hexanes (1:1 v/v solution,  $3 \times 2$  mL) and then portions of THF ( $2 \times 0.5$  mL) were used to rinse the Celite plug. The filtrate was then concentrated in vacuo to 3 mL. Storage of this solution at -25 °C for 15 d resulted in the deposition of a black, crystalline solid, which was isolated by decanting the supernatant (0.0184 g, 8% yield by  $[\text{Ni}(1,5\text{-cod})_2]$ ). An additional crop of crystals was obtained by concentrating the supernatant further (2 mL), followed by storage at -25 °C for 6 d (0.0118 g; 0.0302 g total, 14% total yield by

[Ni(1,5-cod)<sub>2</sub>]]. Crystals of **1** suitable for X-ray crystallography were grown from the slow evaporation of a toluene/diethyl ether (1:10 v:v) solution of **1** that was permitted to slowly evaporate over the course of three weeks at -25 °C. Anal. Calcd for C<sub>66</sub>H<sub>165</sub>Ni<sub>30</sub>P<sub>11</sub>S<sub>16</sub>: C, 22.18; H, 4.65. Found: C, 21.79; H, 4.65. <sup>1</sup>H NMR (500 MHz, 25 °C, benzene-*d*<sub>6</sub>): δ 9.43 (br s, P(CH<sub>2</sub>CH<sub>3</sub>)<sub>3</sub>, 12 H), 5.05 (br m, P(CH<sub>2</sub>CH<sub>3</sub>)<sub>3</sub>, 18 H), 3.40 (br m, P(CH<sub>2</sub>CH<sub>3</sub>)<sub>3</sub>, 24 H), 2.13 (br s, P(CH<sub>2</sub>CH<sub>3</sub>)<sub>3</sub>, 36 H), 1.51 (br s, P(CH<sub>2</sub>CH<sub>3</sub>)<sub>3</sub>, 18 H), 1.30 (br s, P(CH<sub>2</sub>CH<sub>3</sub>)<sub>3</sub>, 12 H), 1.15 (br s, P(CH<sub>2</sub>CH<sub>3</sub>)<sub>3</sub>, 27 H), 0.58 (br s, P(CH<sub>2</sub>CH<sub>3</sub>)<sub>3</sub>, 18 H). <sup>13</sup>C{<sup>1</sup>H} NMR (126 MHz, 25 °C, benzene-*d*<sub>6</sub>): δ 43.82 (s, P(CH<sub>2</sub>CH<sub>3</sub>)<sub>3</sub>), 35.29 (s, P(CH<sub>2</sub>CH<sub>3</sub>)<sub>3</sub>), 29.86 (s, P(CH<sub>2</sub>CH<sub>3</sub>)<sub>3</sub>), 25.18 (s, P(CH<sub>2</sub>CH<sub>3</sub>)<sub>3</sub>), 22.72 (s, P(CH<sub>2</sub>CH<sub>3</sub>)<sub>3</sub> overlapping with an *n*-pentane resonance), 21.93 (s, P(CH<sub>2</sub>CH<sub>3</sub>)<sub>3</sub>), 15.40 (s, P(CH<sub>2</sub>CH<sub>3</sub>)<sub>3</sub>), 11.86 (s, P(CH<sub>2</sub>CH<sub>3</sub>)<sub>3</sub>). <sup>31</sup>P{<sup>1</sup>H} NMR (203 MHz, 25 °C, C<sub>6</sub>D<sub>6</sub>): δ 2050 (2P), 836 (3P), 238 (2P), 25 (4P). <sup>31</sup>P{<sup>1</sup>H} NMR (203 MHz, 25 °C, C<sub>7</sub>D<sub>8</sub>): δ 2054 (2P), 842 (3P), 246 (2P), 30 (4P). <sup>31</sup>P{<sup>1</sup>H} NMR (203 MHz, 15 °C, C<sub>7</sub>D<sub>8</sub>): δ 2071 (2P), 850 (3P), 235 (2P), 9.54 (4P). <sup>31</sup>P{<sup>1</sup>H} NMR (203 MHz, 5 °C, C<sub>7</sub>D<sub>8</sub>): δ 2086 (2P), 859 (3P), 221 (2P), -17.92 (4P). <sup>31</sup>P{<sup>1</sup>H} NMR (203 MHz, -5 °C, C<sub>7</sub>D<sub>8</sub>): δ 2100 (2P), 870 (3P), 209 (2P), -47.2 (4P). <sup>31</sup>P{<sup>1</sup>H} NMR (203 MHz, -15 °C, C<sub>7</sub>D<sub>8</sub>): δ 2110 (2P), 881 (3P), 200 (2P), -78.4 (4P). <sup>31</sup>P{<sup>1</sup>H} NMR (203 MHz, -25 °C, C<sub>7</sub>D<sub>8</sub>): δ 2120 (2P), 894 (3P), 193 (2P), -112 (4P). Evans' method (500 MHz, 423.0 mg of benzene-*d*<sub>6</sub>, 33.8 mg of PhF, 15.1 mg of **1**, 25 °C): Δν = 163.0 Hz, 4.64 μB, 2.70 cm<sup>3</sup> K/mol. (. ESI-MS (THF, positive ion mode, 2.50 kV): 3572.43 *m/z* ([Ni<sub>30</sub>S<sub>16</sub>(PEt<sub>3</sub>)<sub>11</sub>]<sup>+</sup>, [**1**]<sup>+</sup>, calcd 3572.57 *m/z*), 1786.20 *m/z* ([Ni<sub>30</sub>S<sub>16</sub>(PEt<sub>3</sub>)<sub>11</sub>]<sup>2+</sup>, [**1**]<sup>2+</sup>, calcd 1787.30 *m/z*). IR (KBr pellet, cm<sup>-1</sup>): 411 (s), 611 (s), 702 (m), 723 (m), 756 (s), 989 (s), 1024 (s), 1120 (w), 1171 (w), 1240 (s), 1369 (m), 1402 (s), 1448 (s), 2870 (vs), 2922 (vs), 2951 (vs).

**Isolation of  $[\text{Ni}_{26}\text{S}_{14}(\text{PEt}_3)_{10}]$  (**2**).** A 20 mL scintillation vial equipped with a magnetic stir bar was charged with  $[\text{Ni}(1,5\text{-cod})_2]$  (437.0 mg, 1.589 mmol), toluene (7 mL), and triethylphosphine (0.24 mL, 1.62 mmol). To this solution was added a suspension of  $\text{S}_8$  (25.5 mg, 0.0994 mmol) in toluene (1 mL), which resulted in an immediate color change to dark brown. Additional portions of toluene ( $2 \times 1$  mL) were used to transfer all of the  $\text{S}_8$ . After stirring for 5 min, the reaction mixture was pipetted into a 50 mL Cajon flask equipped with a Teflon rototflow valve. Additional portions of toluene ( $3 \times 1.5$  mL) were used to transfer the remaining residue from the vial to the flask; the stir bar was also added to the flask. The flask was sealed and removed from the glovebox, whereupon the solution was heated in an oil bath at 95 °C for 5 h. After 5 h, the flask was brought back into the glovebox and the solution was filtered through a Celite column supported on glass wool (0.5 cm  $\times$  5 cm) to provide a deep brown filtrate. An aliquot (1 mL) was removed from the filtrate, dried *in vacuo*, re-dissolved in benzene- $d_6$  (0.5 mL), and assayed by  $^1\text{H}$  and  $^{31}\text{P}\{^1\text{H}\}$  NMR spectroscopy (Figure S37). The aliquot was then returned to the filtrate, and the volume of the solution was reduced *in vacuo* to 1 mL and the solution was layered with pentane (19 mL). Storage of this solution at  $-25$  °C for 3 d resulted in the deposition of a mixture of black solids and colorless crystals (65 mg), which were isolated by decanting the supernatant. The solids were dried *in vacuo* and then rinsed acetonitrile (8 mL). The rinsings were discarded. The remaining undissolved solids were dissolved in toluene (5 mL) and filtered through a Celite column supported on glass wool (0.5 cm  $\times$  5 cm) to provide a dark brown filtrate. The filtrate was dried *in vacuo* to provide a dark brown solid (40 mg), which consisted of a mixture of **2** and **1** in a 1:1 ratio (as assayed

by  $^1\text{H}$  and  $^{31}\text{P}\{^1\text{H}\}$  NMR spectroscopy). This solid was then redissolved in toluene (5 mL) and filtered through a Celite column supported on glass wool (0.5 cm  $\times$  5 cm) to provide a pale brown filtrate. The filtrate was concentrated *in vacuo* to 1 mL and layered with pentane (19 mL). Storage of this solution at  $-25\text{ }^\circ\text{C}$  for 5 d resulted in the deposition of deep brown crystalline solids (8.8 mg, 5% yield by Ni). Crystals of **2** suitable for X-ray crystallography were grown from a toluene/pentane (0.5 mL/3.5 mL) solution left to slowly evaporate for one week at  $-25\text{ }^\circ\text{C}$ .  $^1\text{H}$  NMR (500 MHz,  $25\text{ }^\circ\text{C}$ ,  $\text{C}_6\text{D}_6$ ):  $\delta$  21.38 (s,  $\text{P}(\text{CH}_2\text{CH}_3)_3$ , 12 H), 6.04 (q,  $J_{\text{HH}} = 7.4\text{ Hz}$ ,  $\text{P}(\text{CH}_2\text{CH}_3)_3$ , 12 H), 5.54 (q,  $J_{\text{HH}} = 7.4\text{ Hz}$ ,  $\text{P}(\text{CH}_2\text{CH}_3)_3$ , 12 H), 4.60 (q,  $J_{\text{HH}} = 7.5\text{ Hz}$ ,  $\text{P}(\text{CH}_2\text{CH}_3)_3$ , 12 H), 2.77 (q,  $J_{\text{HH}} = 7.6\text{ Hz}$ ,  $\text{P}(\text{CH}_2\text{CH}_3)_3$ , 12H), 1.84 (t,  $J_{\text{HH}} = 7.4\text{ Hz}$ ,  $\text{P}(\text{CH}_2\text{CH}_3)_3$ , 18H), 1.77 (t,  $J_{\text{HH}} = 7.4\text{ Hz}$ ,  $\text{P}(\text{CH}_2\text{CH}_3)_3$ , 36H), 1.16 (t,  $J_{\text{HH}} = 7.1\text{ Hz}$ ,  $\text{P}(\text{CH}_2\text{CH}_3)_3$ , 18H), 1.00 (m,  $\text{P}(\text{CH}_2\text{CH}_3)_3$ , 18H).  $^{31}\text{P}\{^1\text{H}\}$  NMR (202 MHz,  $25\text{ }^\circ\text{C}$ ,  $\text{C}_6\text{D}_6$ ):  $\delta$  5730 (2P), 912 (2P), 606 (2P), 179 (4P).  $^{13}\text{C}\{^1\text{H}\}$  NMR (126 MHz,  $\text{C}_6\text{D}_6$ ):  $\delta$  73.44 ( $\text{P}(\text{CH}_2\text{CH}_3)_3$ ), 35.47 ( $\text{P}(\text{CH}_2\text{CH}_3)_3$ ), 32.59 ( $\text{P}(\text{CH}_2\text{CH}_3)_3$ ), 26.19 ( $\text{P}(\text{CH}_2\text{CH}_3)_3$ ), 22.73 ( $\text{P}(\text{CH}_2\text{CH}_3)_3$ ), 15.04 ( $\text{P}(\text{CH}_2\text{CH}_3)_3$ ), 14.84 ( $\text{P}(\text{CH}_2\text{CH}_3)_3$ ), 13.86 ( $\text{P}(\text{CH}_2\text{CH}_3)_3$ ). ESI-MS (THF, positive ion mode, 2.50 kV): 3155.05  $m/z$  ( $[\text{Ni}_{26}\text{S}_{14}(\text{PEt}_3)_{10}]^+$ , [**2**] $^+$ , calcd 3154.80  $m/z$ ), 1577.55  $m/z$  ( $[\text{Ni}_{26}\text{S}_{14}(\text{PEt}_3)_{10}]^{2+}$ , [**2**] $^{2+}$ , calcd 1577.40  $m/z$ ).

***In situ* Monitoring of the Formation of 1.** A 20 mL scintillation vial equipped with a magnetic stir bar was charged with  $[\text{Ni}(1,5\text{-cod})_2]$  (0.0862 g, 0.313 mmol), toluene- $d_8$  (6 mL),  $\text{PEt}_3$  (0.069 mL, 0.468 mmol), and  $\text{S}_8$  (0.0050 g, 0.019 mmol). After stirring for 2 min, triphenylphosphine oxide (0.0255 g, 0.0916 mmol) was added to the reaction mixture as an internal standard. An aliquot (1 mL) was then removed from the reaction mixture and dried *in vacuo*. The resulting solid was re-dissolved in



C<sub>6</sub>D<sub>6</sub> (1 mL) and analyzed by <sup>1</sup>H and <sup>31</sup>P{<sup>1</sup>H} NMR spectroscopies. A second aliquot (0.5 mL) was also removed from the reaction mixture at this time, and dried *in vacuo*. This solid was re-dissolved in THF and analyzed by ESI-MS. The remaining reaction mixture was transferred to a 50 mL Cajon flask equipped with a Teflon rotoflow valve, removed from the glovebox, and heated to 115 °C in an oil bath temperature. After 15 min at 115 °C, the flask was returned to the glovebox, and additional aliquots were removed for analysis by NMR spectroscopy and ESI-MS. Subsequently, the flask was removed from the glovebox and returned to the oil bath at 115 °C. Additional aliquots were taken at 45 min, 105 min, 225 min, and 17 h, and similarly analyzed. <sup>1</sup>H NMR (initial aliquot, C<sub>6</sub>D<sub>6</sub>, 25 °C): 0.89 (m, [(1,5-cod)Ni(PEt<sub>3</sub>)<sub>2</sub>], CH<sub>3</sub>, 18H), 1.42 (m, [(1,5-cod)Ni(PEt<sub>3</sub>)<sub>2</sub>], CH<sub>2</sub>, 12H), 2.20 (s, 1,5-cod, allylic H), 2.35 (m, [(1,5-cod)Ni(PEt<sub>3</sub>)<sub>2</sub>], allylic H, 8H), 4.32 (m, [(1,5-cod)Ni(PEt<sub>3</sub>)<sub>2</sub>], vinylic H, 4H), 5.53 (s, vinylic H, 1,5-cod, 4H), 7.12 – 6.95 (overlapping phenyl resonances assignable to toluene and triphenylphosphine oxide), 7.68 (m, o-Ph, OPPh<sub>3</sub>, 6H). <sup>1</sup>H NMR (aliquot taken after 15 min at 115 °C, C<sub>6</sub>D<sub>6</sub>, 25 °C): 0.99 (m, unassigned ethyl resonances, P(CH<sub>2</sub>CH<sub>3</sub>)<sub>3</sub>), 2.20 (s, 1,5-cod, allylic H), 5.53 (s, vinylic H, 1,5-cod, 4H), 7.68 (m, o-Ph, OPPh<sub>3</sub>, 6H), 8.46 (s, unassigned), 8.66 (s, unassigned), 9.34 (br s, P(CH<sub>2</sub>CH<sub>3</sub>)<sub>3</sub>, 12 H, [Ni<sub>30</sub>S<sub>16</sub>(PEt<sub>3</sub>)<sub>11</sub>] (**1**)), 9.91 (s, unassigned), 11.56 (s, unassigned), 12.05 (s, unassigned), 12.10 (s, unassigned), 12.53 (s, unassigned), 13.21 (s, unassigned), 14.39 (s, unassigned), 21.51 (s, P(CH<sub>2</sub>CH<sub>3</sub>)<sub>3</sub>, 12H, [Ni<sub>26</sub>S<sub>14</sub>(PEt<sub>3</sub>)<sub>10</sub>] (**2**)), 26.47 (s, unassigned). <sup>1</sup>H NMR (aliquot taken after 45 min at 115 °C, C<sub>6</sub>D<sub>6</sub>, 25 °C): 0.99 (m, unassigned ethyl resonances, P(CH<sub>2</sub>CH<sub>3</sub>)<sub>3</sub>), 2.20 (s, 1,5-cod, allylic H), 5.53 (s, vinylic H, 1,5-cod, 4H), 7.68 (m, o-Ph, OPPh<sub>3</sub>, 6H), 9.34 (br s, P(CH<sub>2</sub>CH<sub>3</sub>)<sub>3</sub>, 12 H, [Ni<sub>30</sub>S<sub>16</sub>(PEt<sub>3</sub>)<sub>11</sub>] (**1**)), 21.51

(s, P(CH<sub>2</sub>CH<sub>3</sub>)<sub>3</sub>), 12H, [Ni<sub>26</sub>S<sub>14</sub>(PEt<sub>3</sub>)<sub>10</sub>] (**2**)). <sup>1</sup>H NMR (aliquot taken after 105 min at 115 °C, C<sub>6</sub>D<sub>6</sub>, 25 °C): 0.99 (m, unassigned ethyl resonances, P(CH<sub>2</sub>CH<sub>3</sub>)<sub>3</sub>), 2.20 (s, 1,5-cod, allylic H), 5.53 (s, vinylic H, 1,5-cod, 4H), 7.68 (m, o-Ph, OPPh<sub>3</sub>, 6H), 9.34 (br s, P(CH<sub>2</sub>CH<sub>3</sub>)<sub>3</sub>, 12 H, [Ni<sub>30</sub>S<sub>16</sub>(PEt<sub>3</sub>)<sub>11</sub>] (**1**)), 21.49 (s, P(CH<sub>2</sub>CH<sub>3</sub>)<sub>3</sub>), 12H, [Ni<sub>26</sub>S<sub>14</sub>(PEt<sub>3</sub>)<sub>10</sub>] (**2**)). <sup>1</sup>H NMR (aliquot taken after 225 min at 115 °C, C<sub>6</sub>D<sub>6</sub>, 25 °C): 0.99 (m, unassigned ethyl resonances, P(CH<sub>2</sub>CH<sub>3</sub>)<sub>3</sub>), 2.20 (s, 1,5-cod, allylic H), 5.53 (s, vinylic H, 1,5-cod, 4H), 7.68 (m, o-Ph, OPPh<sub>3</sub>, 6H), 9.34 (br s, P(CH<sub>2</sub>CH<sub>3</sub>)<sub>3</sub>, 12 H, [Ni<sub>30</sub>S<sub>16</sub>(PEt<sub>3</sub>)<sub>11</sub>] (**1**)). <sup>1</sup>H NMR (aliquot taken after 17 h at 115 °C, C<sub>6</sub>D<sub>6</sub>, 25 °C): 0.99 (m, unassigned ethyl resonances, P(CH<sub>2</sub>CH<sub>3</sub>)<sub>3</sub>), 2.20 (s, 1,5-cod, allylic H), 5.53 (s, vinylic H, 1,5-cod, 4H), 7.68 (m, o-Ph, OPPh<sub>3</sub>, 6H), 9.34 (br s, P(CH<sub>2</sub>CH<sub>3</sub>)<sub>3</sub>, 12 H, [Ni<sub>30</sub>S<sub>16</sub>(PEt<sub>3</sub>)<sub>11</sub>] (**1**)). <sup>31</sup>P{<sup>1</sup>H} NMR (initial aliquot, C<sub>6</sub>D<sub>6</sub>, 25 °C): -4.30 (s, PEt<sub>3</sub>, 4P, [Ni<sub>8</sub>S<sub>5</sub>(PEt<sub>3</sub>)<sub>7</sub>]), 7.16 (s, unassigned), 9.72 (s, unassigned), 12.94 (s, PEt<sub>3</sub>, 2P, [Ni<sub>8</sub>S<sub>5</sub>(PEt<sub>3</sub>)<sub>7</sub>]), 13.46 (s, PEt<sub>3</sub>, 1P, [Ni<sub>8</sub>S<sub>5</sub>(PEt<sub>3</sub>)<sub>7</sub>]), 15.52 (s, unassigned), 15.95 (s, unassigned), 17.72 (s, unassigned, overlapping with [Ni(1,5-cod)(PEt<sub>3</sub>)<sub>2</sub>]), 18.15 (s, [Ni(1,5-cod)(PEt<sub>3</sub>)<sub>2</sub>], overlapping with unassigned resonance), 19.58 (s, unassigned), 19.97 (s, unassigned), 24.55 (s, OPPh<sub>3</sub>), 30.94 (s, unassigned), 45.04 (s, unassigned), 52.88 (s, SPEt<sub>3</sub>), 229.68 (s, unassigned). <sup>31</sup>P{<sup>1</sup>H} NMR (aliquot taken after 15 min at 115 °C, C<sub>6</sub>D<sub>6</sub>, 25 °C): -4.66 (s, PEt<sub>3</sub>, 4P, [Ni<sub>8</sub>S<sub>5</sub>(PEt<sub>3</sub>)<sub>7</sub>]), 9.28 (s, unassigned), 13.06 (s, PEt<sub>3</sub>, 2P, [Ni<sub>8</sub>S<sub>5</sub>(PEt<sub>3</sub>)<sub>7</sub>]), 15.09 (s, PEt<sub>3</sub>, 1P, [Ni<sub>8</sub>S<sub>5</sub>(PEt<sub>3</sub>)<sub>7</sub>]), 24.55 (s, OPPh<sub>3</sub>), 30.44 (s, PEt<sub>3</sub>, 4P, [Ni<sub>30</sub>S<sub>16</sub>(PEt<sub>3</sub>)<sub>11</sub>] (**1**)), 52.44 (s, SPEt<sub>3</sub>), 159.42 (s, unassigned), 246.22 (s, PEt<sub>3</sub>, 2P, [Ni<sub>30</sub>S<sub>16</sub>(PEt<sub>3</sub>)<sub>11</sub>] (**1**)). <sup>31</sup>P{<sup>1</sup>H} NMR (aliquot taken after 45 min at 115 °C, C<sub>6</sub>D<sub>6</sub>, 25 °C): 9.24 (s, unassigned), 24.55 (s, OPPh<sub>3</sub>), 30.44 (s, PEt<sub>3</sub>, 4P, [Ni<sub>30</sub>S<sub>16</sub>(PEt<sub>3</sub>)<sub>11</sub>] (**1**)), 52.44 (s, SPEt<sub>3</sub>), 246.22 (s, PEt<sub>3</sub>, 2P, [Ni<sub>30</sub>S<sub>16</sub>(PEt<sub>3</sub>)<sub>11</sub>] (**1**)). <sup>31</sup>P{<sup>1</sup>H} NMR (aliquot taken after 105 min at 115 °C,

$C_6D_6$ , 25 °C): 9.24 (s, unassigned), 24.55 (s,  $OPPh_3$ ), 30.19 (s,  $PEt_3$ , 4P,  $[Ni_{30}S_{16}(PEt_3)_{11}]$  (**1**)), 52.44 (s,  $SPEt_3$ ), 246.22 (s,  $PEt_3$ , 2P,  $[Ni_{30}S_{16}(PEt_3)_{11}]$  (**1**)).  $^{31}P\{^1H\}$  NMR (aliquot taken after 225 min at 115 °C,  $C_6D_6$ , 25 °C): 9.24 (s, unassigned), 24.55 (s,  $OPPh_3$ ), 30.19 (s,  $PEt_3$ , 4P,  $[Ni_{30}S_{16}(PEt_3)_{11}]$  (**1**)), 52.44 (s,  $SPEt_3$ ), 246.22 (s,  $PEt_3$ , 2P,  $[Ni_{30}S_{16}(PEt_3)_{11}]$  (**1**)).  $^{31}P\{^1H\}$  NMR (aliquot taken after 17 h at 115 °C,  $C_6D_6$ , 25 °C): 9.24 (s, unassigned), 24.55 (s,  $OPPh_3$ ), 30.19 (s,  $PEt_3$ , 4P,  $[Ni_{30}S_{16}(PEt_3)_{11}]$  (**1**)), 52.44 (s,  $SPEt_3$ ), 246.22 (s,  $PEt_3$ , 2P,  $[Ni_{30}S_{16}(PEt_3)_{11}]$  (**1**)). ESI-MS (initial aliquot, THF, positive ion mode, 2.50 kV): 1455.9746  $m/z$  ( $[Ni_8S_5(PEt_3)_7]^+$ , calcd 1455.9733  $m/z$ ), 1548.8735  $m/z$  ( $[Ni_{12}S_8(PEt_3)_5]^+$ , calcd 1549.4364  $m/z$ ), 1935.2334  $m/z$  ( $[Ni_{16}S_9(PEt_3)_6]^+$ , calcd 1935.2368  $m/z$ ). ESI-MS (aliquot taken after 15 min at 115 °C, THF, positive ion mode, 2.50 kV): 775.3942  $m/z$  ( $[Ni_5S_4(PEt_3)_3]^+$ , calcd 775.8306  $m/z$ ), 1455.9589  $m/z$  ( $[Ni_8S_5(PEt_3)_7]^+$ , calcd 1455.9733  $m/z$ ), 1548.8735  $m/z$  ( $[Ni_{12}S_8(PEt_3)_5]^+$ , calcd 1549.4364  $m/z$ ), 1786.2678  $m/z$  ( $[Ni_{30}S_{16}(PEt_3)_{11}]^{2+}$  (**[1]**)<sup>2+</sup>, calcd 1786.2880  $m/z$ ), 3154.8130  $m/z$  ( $[Ni_{26}S_{14}(PEt_3)_{10}]^+$  (**[2]**)<sup>+</sup>, calcd 3154.8032  $m/z$ ), 3572.5762  $m/z$  ( $[Ni_{30}S_{16}(PEt_3)_{11}]^+$  (**[1]**)<sup>+</sup>, calcd 3572.5681  $m/z$ ). ESI-MS (aliquot taken after 45 min at 115 °C, THF, positive ion mode, 2.50 kV): 1396.0408  $m/z$  ( $[Ni_7S_5(PEt_3)_7]^+$ , calcd 1396.0380  $m/z$ ), 1455.9746  $m/z$  ( $[Ni_8S_5(PEt_3)_7]^+$ , calcd 1455.9733  $m/z$ ), 1548.8735  $m/z$  ( $[Ni_{12}S_8(PEt_3)_5]^+$ , calcd 1549.4364  $m/z$ ), 1786.2678  $m/z$  ( $[Ni_{30}S_{16}(PEt_3)_{11}]^{2+}$  (**[1]**)<sup>2+</sup>, calcd 1786.2880  $m/z$ ), 1983.9646  $m/z$  ( $[Ni_{32}S_{21}(PEt_3)_{12}]^{2+}$ , calcd 1984.1973  $m/z$ ), 2384.9607  $m/z$  ( $[Ni_{20}S_{12}(PEt_3)_7]^+$ , calcd 2384.9814  $m/z$ ), 2508.8269  $m/z$  ( $[Ni_{21}S_{14}(PEt_3)_7]^+$ , calcd 2506.8608  $m/z$ ), 2624.9739  $m/z$  ( $[Ni_{21}S_{14}(PEt_3)_8]^+$ , calcd 2624.9521  $m/z$ ), 3154.7900  $m/z$  ( $[Ni_{26}S_{14}(PEt_3)_{10}]^+$  (**[2]**)<sup>+</sup>, calcd 3154.8032  $m/z$ ), 3572.5273  $m/z$  ( $[Ni_{30}S_{16}(PEt_3)_{11}]^+$  (**[1]**)<sup>+</sup>, calcd

3572.5681  $m/z$ ). ESI-MS (aliquot taken after 105 min at 115 °C, THF, positive ion mode, 2.50 kV): 1200.0392  $m/z$  (unidentified Ni<sub>6</sub> cluster), 1396.0408  $m/z$  ([Ni<sub>7</sub>S<sub>5</sub>(PEt<sub>3</sub>)<sub>7</sub>]<sup>+</sup>, calcd 1396.0380  $m/z$ ), 1786.2678  $m/z$  ([Ni<sub>30</sub>S<sub>16</sub>(PEt<sub>3</sub>)<sub>11</sub>]<sup>2+</sup> (**[1]**<sup>2+</sup>), calcd 1786.2880  $m/z$ ), 2384.9607  $m/z$  ([Ni<sub>20</sub>S<sub>12</sub>(PEt<sub>3</sub>)<sub>7</sub>]<sup>+</sup>, calcd 2384.9814  $m/z$ ), 2506.8179  $m/z$  ([Ni<sub>21</sub>S<sub>14</sub>(PEt<sub>3</sub>)<sub>7</sub>]<sup>+</sup>, calcd 2506.8608  $m/z$ ), 2624.9111  $m/z$  ([Ni<sub>21</sub>S<sub>14</sub>(PEt<sub>3</sub>)<sub>8</sub>]<sup>+</sup>, calcd 2624.9521  $m/z$ ), 2860.0703  $m/z$  ([Ni<sub>23</sub>S<sub>14</sub>(PEt<sub>3</sub>)<sub>9</sub>]<sup>+</sup>, calcd 2860.9102  $m/z$ ), 3154.8130  $m/z$  ([Ni<sub>26</sub>S<sub>14</sub>(PEt<sub>3</sub>)<sub>10</sub>]<sup>+</sup> (**[2]**<sup>+</sup>), calcd 3154.8032  $m/z$ ), 3572.5029  $m/z$  ([Ni<sub>30</sub>S<sub>16</sub>(PEt<sub>3</sub>)<sub>11</sub>]<sup>+</sup> (**[1]**<sup>+</sup>), calcd 3572.5681  $m/z$ ). ESI-MS (aliquot taken after 225 min at 115 °C, THF, positive ion mode, 2.50 kV): 1200.0392  $m/z$  (unidentified Ni<sub>6</sub> cluster), 1786.2678  $m/z$  ([Ni<sub>30</sub>S<sub>16</sub>(PEt<sub>3</sub>)<sub>11</sub>]<sup>2+</sup> (**[1]**<sup>2+</sup>), calcd 1786.2880  $m/z$ ), 2624.9319  $m/z$  ([Ni<sub>21</sub>S<sub>14</sub>(PEt<sub>3</sub>)<sub>8</sub>]<sup>+</sup>, calcd 2624.9521  $m/z$ ), 3572.5273  $m/z$  ([Ni<sub>30</sub>S<sub>16</sub>(PEt<sub>3</sub>)<sub>11</sub>]<sup>+</sup> (**[1]**<sup>+</sup>), calcd 3572.5681  $m/z$ ). ESI-MS (aliquot taken after 17 h at 115 °C, THF, positive ion mode, 2.50 kV): 1200.0392  $m/z$  (unidentified Ni<sub>6</sub> cluster), 1786.2678  $m/z$  ([Ni<sub>30</sub>S<sub>16</sub>(PEt<sub>3</sub>)<sub>11</sub>]<sup>2+</sup> (**[1]**<sup>2+</sup>), calcd 1786.2880  $m/z$ ), 3572.5029  $m/z$  ([Ni<sub>30</sub>S<sub>16</sub>(PEt<sub>3</sub>)<sub>11</sub>]<sup>+</sup> (**[1]**<sup>+</sup>), calcd 3572.5681  $m/z$ ). The prominent peak at 1200.0392  $m/z$  in the 17 h, 225 min, and 105 min spectra could not be definitively assigned; however, the molecular weight and isotope pattern suggests it is a Ni<sub>6</sub> cluster. Resonances assigned to [(1,5-cod)Ni(PEt<sub>3</sub>)<sub>2</sub>], 1,5-cod, and SPEt<sub>3</sub> are consistent with those previously reported for [(1,5-cod)Ni(PEt<sub>3</sub>)<sub>2</sub>],<sup>4</sup> 1,5-cod,<sup>5</sup> SPEt<sub>3</sub>.<sup>6,7</sup>

**X-ray Crystallography.** Data for **1**·Et<sub>2</sub>O and **2**·C<sub>5</sub>H<sub>12</sub> was collected on a Bruker KAPPA APEX II diffractometer equipped with an APEX II CCD detector using a TRIUMPH monochromator with a MoK $\alpha$  X-ray source ( $\alpha = 0.71073 \text{ \AA}$ ). Crystals of **1**·Et<sub>2</sub>O and **2**·C<sub>5</sub>H<sub>12</sub> were mounted on a cryoloop under Paratone-N oil. Data for **1**·Et<sub>2</sub>O

and  $2 \cdot \text{C}_5\text{H}_{12}$  were collected at 100(2) K and 116(2) K, respectively, using an Oxford nitrogen gas cryostream system. Data for  $1 \cdot \text{Et}_2\text{O}$  and  $2 \cdot \text{C}_5\text{H}_{12}$  were collected utilizing frame exposures of 30 s and 60 s, respectively. Data collection and cell parameter determination were conducted using the SMART program.<sup>8</sup> Integration of the data frames and final cell parameter refinement were performed using SAINT software.<sup>9</sup> Absorption correction of the data was carried out using the multi-scan method SADABS.<sup>10</sup> Subsequent calculations were carried out using SHELXTL.<sup>11</sup> Structure determination was done using the intrinsic phasing method in SHELXTL embedded in APEX2.<sup>11</sup> All hydrogen atom positions were idealized, and rode on the atom of attachment. Structure solution, refinement, graphics, and creation of publication materials were performed using SHELXTL.<sup>11</sup> Ball and stick graphics for  $1 \cdot \text{Et}_2\text{O}$  and  $2 \cdot \text{C}_5\text{H}_{12}$  were generated using VESTA, version 3.5.7.<sup>12</sup>

For  $1 \cdot \text{Et}_2\text{O}$  and  $2 \cdot \text{C}_5\text{H}_{12}$ , the EADP command was used to constrain anisotropic (or isotropic) displacement parameters of the methylene and methyl carbons of the triethylphosphine ligands. The SADI command was further used to constrain the ethyl groups of the triethylphosphine ligands.

For  $1 \cdot \text{Et}_2\text{O}$ , the diethyl ether solvate molecule was constrained using the EADP and SADI commands. Additionally, the DFIX command was used to fix the C-O and C-C distances in the diethyl ether solvate molecule, as well as the P1-C2 and C1-C2 distances (2.75 Å and 1.52 Å, respectively).

For  $2 \cdot \text{C}_5\text{H}_{12}$ , the crystal was badly twinned; however, integrating and refining the data to include two or more domains did not improve the structure quality. As such,

the disorder on the ethyl groups of the  $\text{PEt}_3$  ligands was not resolved, and these carbon atoms were only refined isotropically. Additionally, the carbon atoms of the pentane solvate molecule were constrained using the EADP and SADI commands. The DFIX command was used to fix the C-C bonds of the pentane solvate molecule as well as the P1-C2 and C1-C2 distances (2.8 Å and 1.5 Å, respectively). Hydrogen atoms were not assigned to the pentane solvate.

Further crystallographic details can be found in Table S1. Complexes **1**·Et<sub>2</sub>O and **2**·C<sub>5</sub>H<sub>12</sub> have been deposited in the Cambridge Structural Database (**1**·Et<sub>2</sub>O: CCDC 2150613; **2**·C<sub>5</sub>H<sub>12</sub>: CCDC 2150614).

**Table S1.** X-ray Crystallographic Data for **1**·Et<sub>2</sub>O and **2**·C<sub>5</sub>H<sub>12</sub>

|                                                     | [Ni <sub>30</sub> S <sub>16</sub> (PEt <sub>3</sub> ) <sub>11</sub> ]·Et <sub>2</sub> O<br>( <b>1</b> ·Et <sub>2</sub> O) | [Ni <sub>26</sub> S <sub>14</sub> (PEt <sub>3</sub> ) <sub>10</sub> ]·C <sub>5</sub> H <sub>12</sub><br>( <b>2</b> ·C <sub>5</sub> H <sub>12</sub> ) |
|-----------------------------------------------------|---------------------------------------------------------------------------------------------------------------------------|------------------------------------------------------------------------------------------------------------------------------------------------------|
| empirical formula                                   | Ni <sub>30</sub> S <sub>16</sub> P <sub>11</sub> O <sub>70</sub> H <sub>175</sub>                                         | Ni <sub>26</sub> S <sub>14</sub> P <sub>10</sub> C <sub>65</sub> H <sub>162</sub>                                                                    |
| crystal habit, color                                | Plate, black                                                                                                              | Plate, black                                                                                                                                         |
| crystal size (mm)                                   | 0.25 × 0.20 × 0.05                                                                                                        | 0.20 × 0.15 × 0.10                                                                                                                                   |
| crystal system                                      | Monoclinic                                                                                                                | Monoclinic                                                                                                                                           |
| space group                                         | <i>P</i> 2 <sub>1</sub> / <i>n</i>                                                                                        | <i>P</i> 2 <sub>1</sub> / <i>n</i>                                                                                                                   |
| volume (Å <sup>3</sup> )                            | 12191(6)                                                                                                                  | 11374(16)                                                                                                                                            |
| <i>a</i> (Å)                                        | 19.050(6)                                                                                                                 | 19.007(15)                                                                                                                                           |
| <i>b</i> (Å)                                        | 33.432(10)                                                                                                                | 25.85(2)                                                                                                                                             |
| <i>c</i> (Å)                                        | 21.256(6)                                                                                                                 | 23.475(19)                                                                                                                                           |
| <i>α</i> (deg)                                      | 90                                                                                                                        | 90                                                                                                                                                   |
| <i>β</i> (deg)                                      | 115.771(4)                                                                                                                | 99.628(7)                                                                                                                                            |
| <i>γ</i> (deg)                                      | 90                                                                                                                        | 90                                                                                                                                                   |
| <i>Z</i>                                            | 4                                                                                                                         | 4                                                                                                                                                    |
| formula weight (g/mol)                              | 3648.02                                                                                                                   | 3228.94                                                                                                                                              |
| density (calculated) (Mg/m <sup>3</sup> )           | 1.988                                                                                                                     | 1.886                                                                                                                                                |
| absorption coefficient (mm <sup>-1</sup> )          | 4.957                                                                                                                     | 4.615                                                                                                                                                |
| <i>F</i> <sub>000</sub>                             | 7456                                                                                                                      | 6616                                                                                                                                                 |
| <i>R</i> <sub>int</sub>                             | 0.0488                                                                                                                    | 0.2698                                                                                                                                               |
| total no. reflections                               | 68292                                                                                                                     | 41853                                                                                                                                                |
| unique reflections                                  | 23848                                                                                                                     | 18613                                                                                                                                                |
| final <i>R</i> indices [ <i>I</i> > 2σ( <i>I</i> )] | <i>R</i> <sub>1</sub> = 0.0948<br>w <i>R</i> <sub>2</sub> = 0.2530                                                        | <i>R</i> <sub>1</sub> = 0.1338<br>w <i>R</i> <sub>2</sub> = 0.2944                                                                                   |
| largest diff. peak and hole (e·Å <sup>-3</sup> )    | 2.484 and -1.804                                                                                                          | 1.270 and -1.092                                                                                                                                     |
| GOF                                                 | 1.173                                                                                                                     | 0.919                                                                                                                                                |

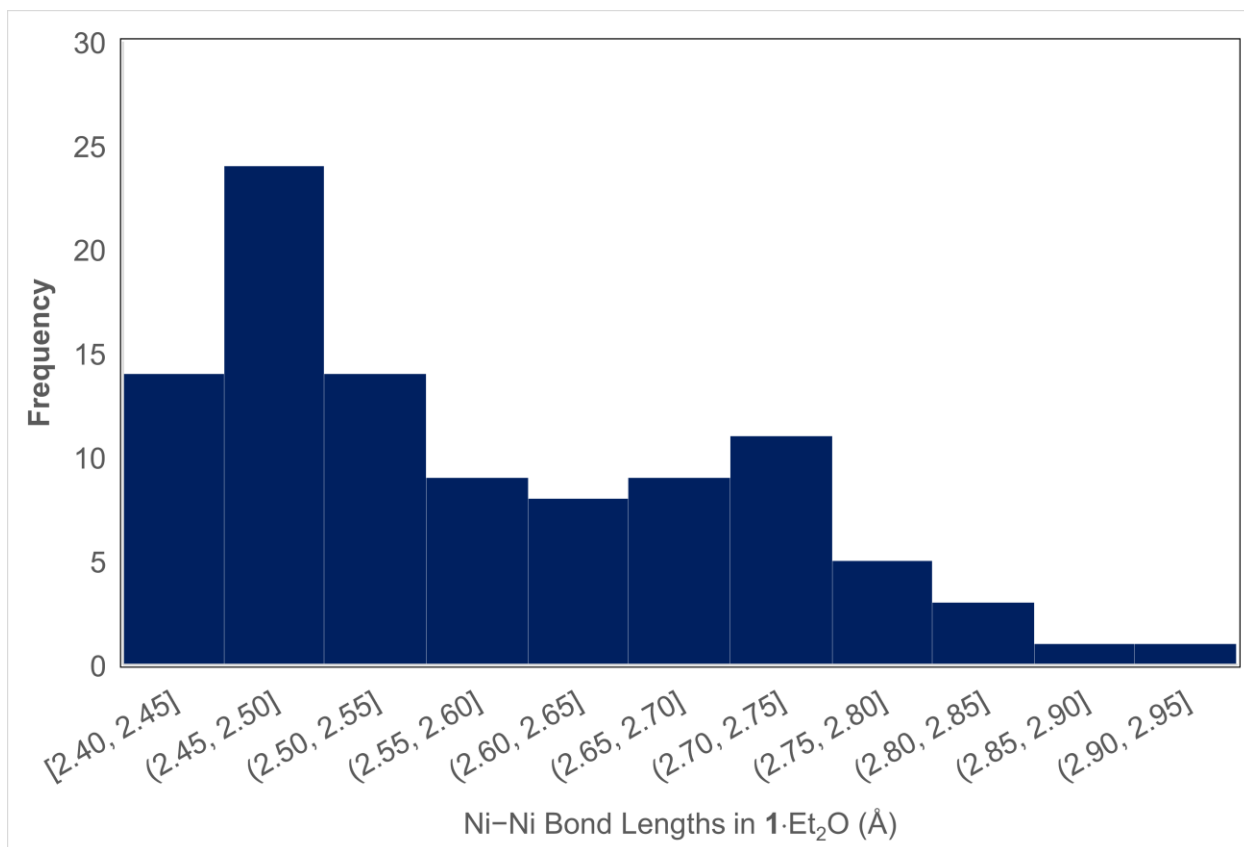

**Figure S1.** Histogram depicting the distribution of Ni-Ni bond distances in **1·Et<sub>2</sub>O**.



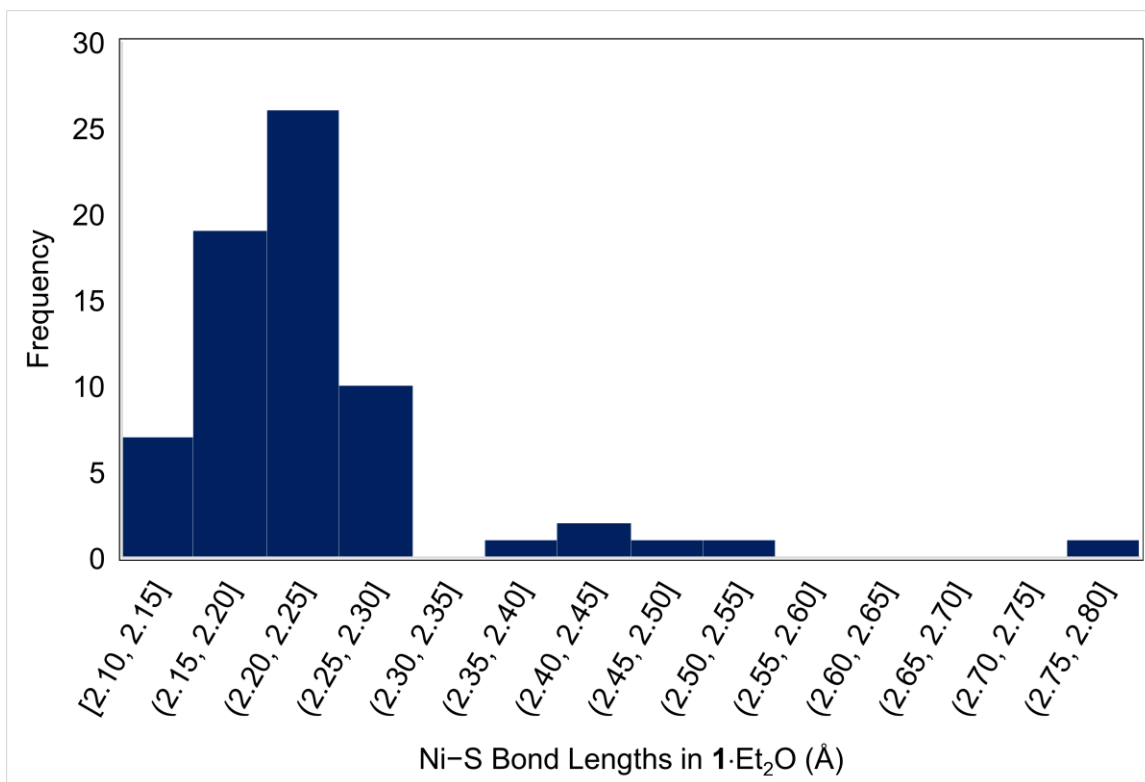

**Figure S2.** Histogram depicting the distribution of Ni-S bond distances in 1·Et<sub>2</sub>O.

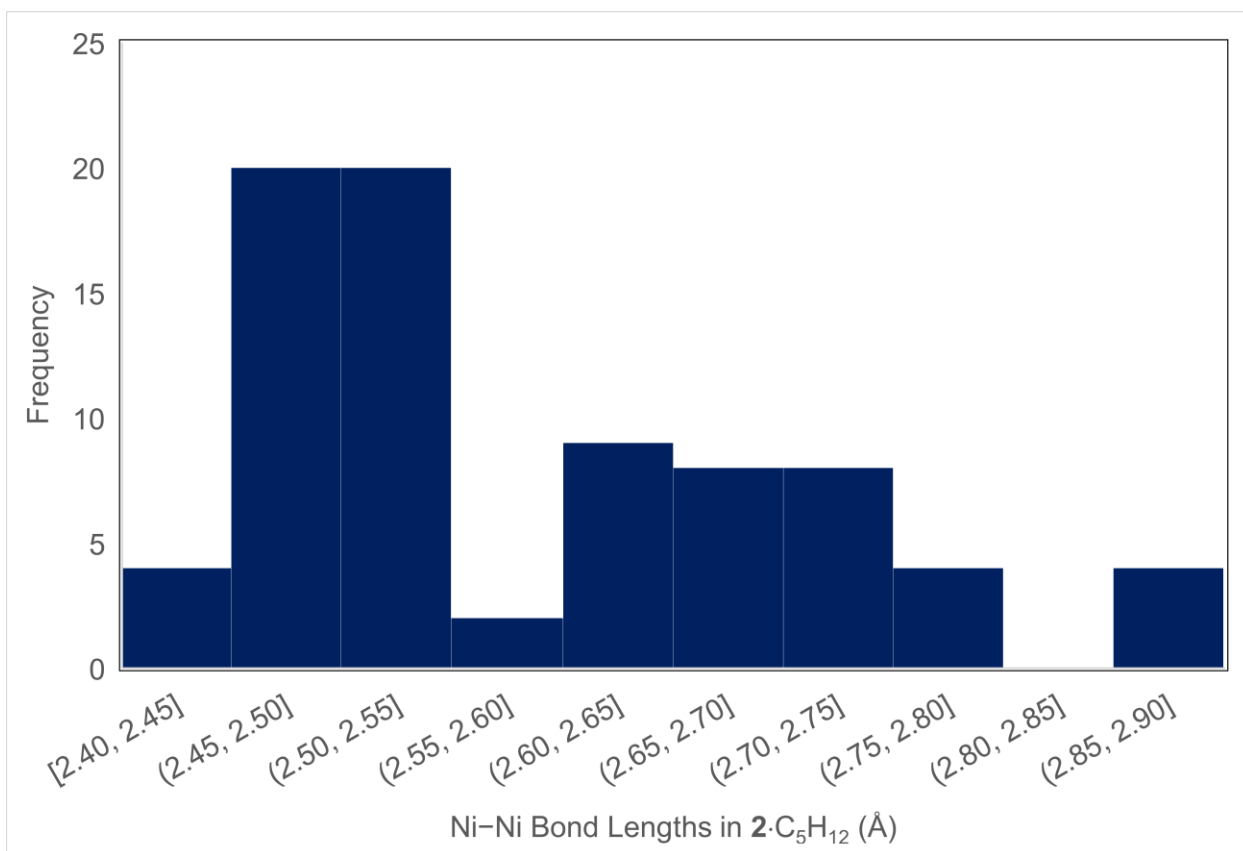

**Figure S3.** Histogram depicting the distribution of Ni–Ni bond distances in  $2 \cdot C_5H_{12}$ .

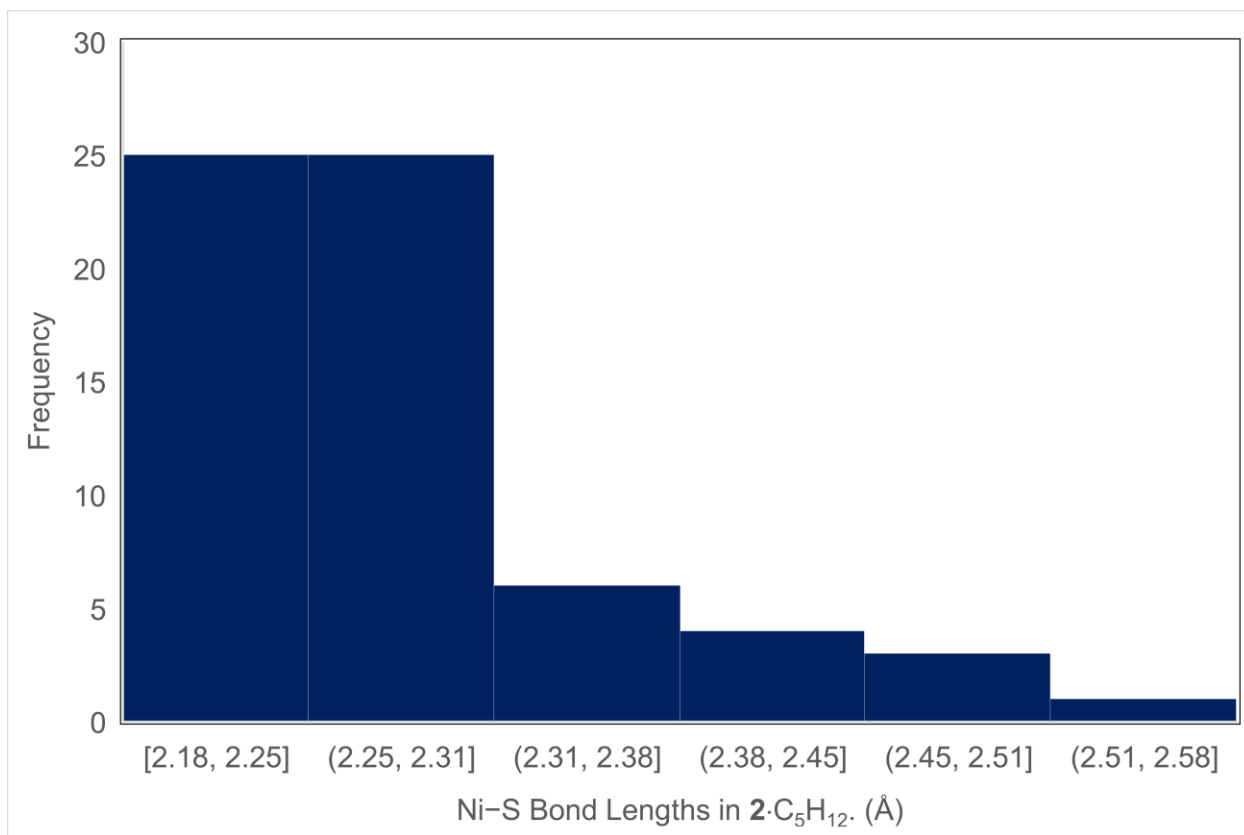

**Figure S4.** Histogram depicting the distribution of Ni-S bond distances in 2·C<sub>5</sub>H<sub>12</sub>.

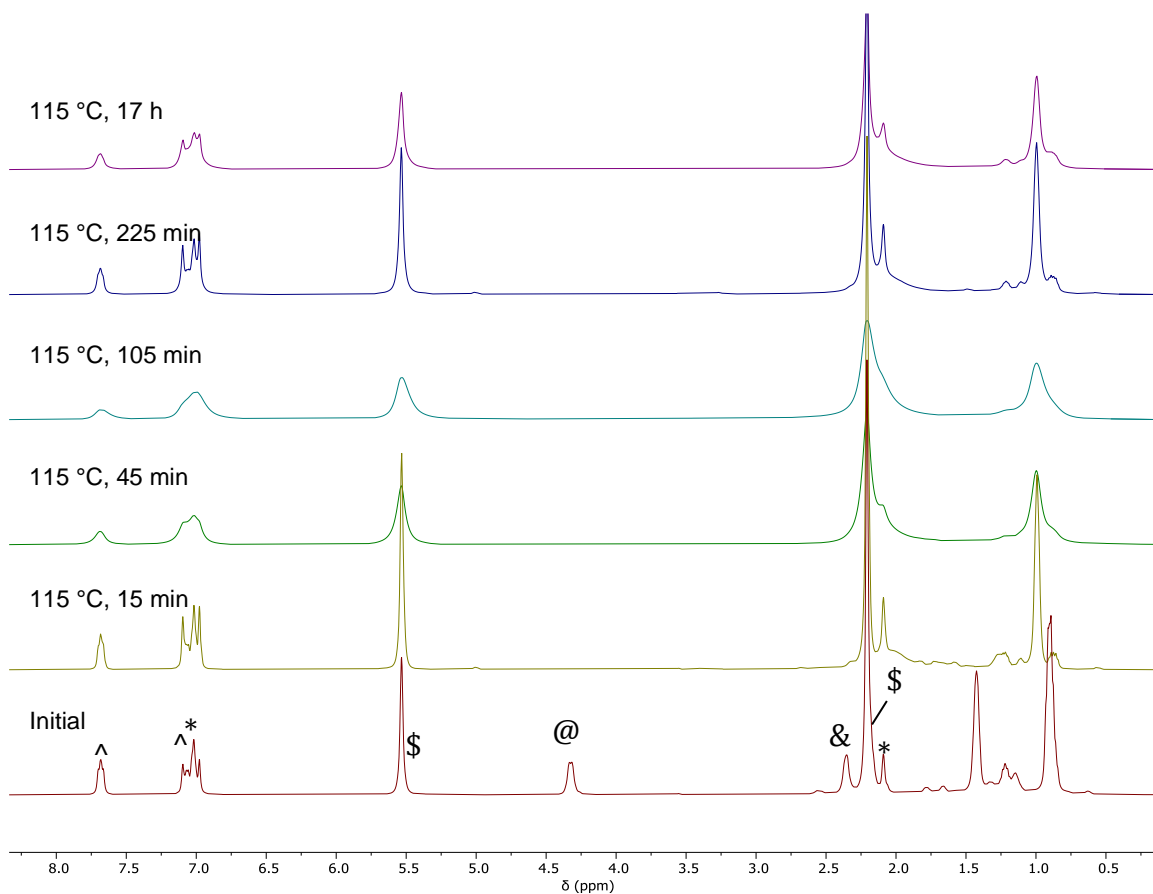

**Figure S5.** Partial  $^1\text{H}$  NMR (25 °C, toluene- $d_8$ ) spectra of the reaction of  $[\text{Ni}(1,5\text{-cod})_2]$  with  $\text{PEt}_3$  (1.5 equiv) and  $\text{S}_8$  (0.06 equiv). For experimental details, see pages S8–S12. ( $\$$ ) indicates a resonance assignable to free 1,5-cod. ( $\wedge$ ) indicates a resonance assigned to triphenylphosphine oxide. ( $@$ ) indicates a resonance assignable to  $[\text{Ni}(1,5\text{-cod})_2]$ . ( $*$ ) indicates a resonance assignable to toluene. ( $\&$ ) indicates a resonance tentatively assigned to  $[\text{Ni}(1,5\text{-cod})(\text{PEt}_3)_2]$ .

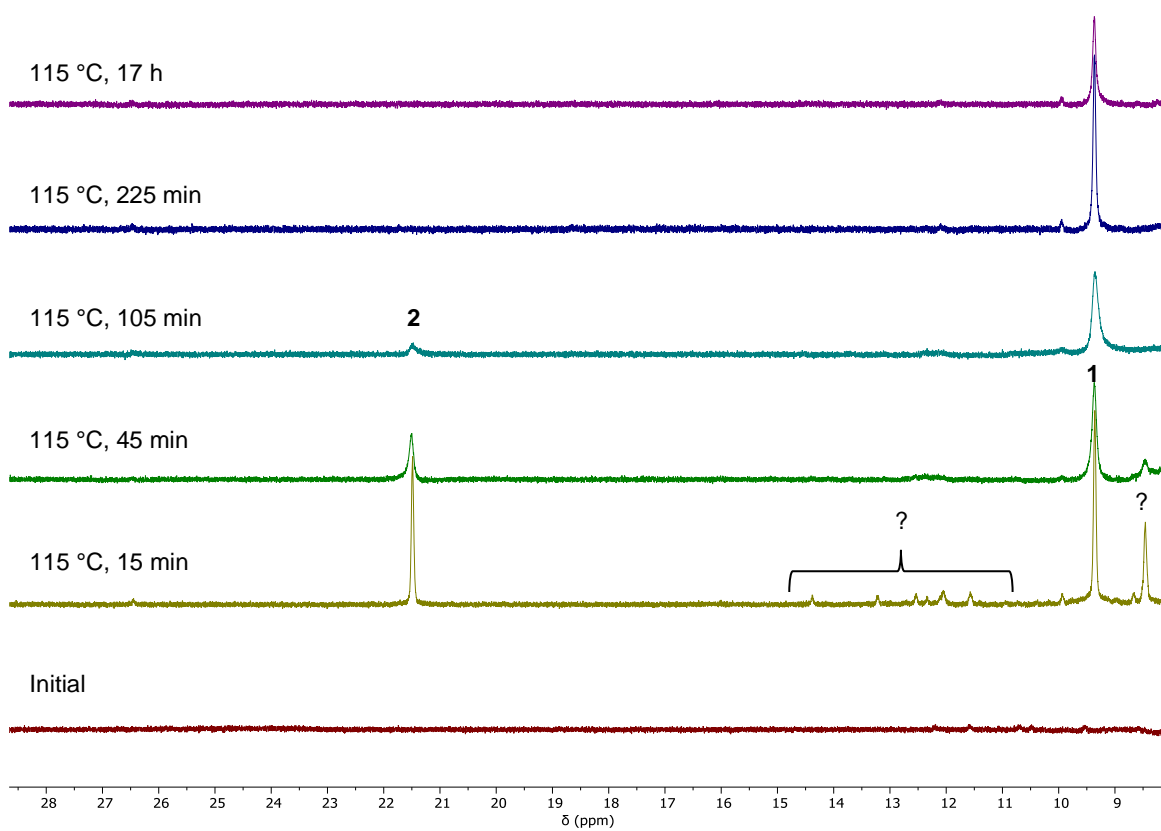

**Figure S6.** Partial <sup>1</sup>H NMR (25 °C, toluene-*d*<sub>8</sub>) spectra of the reaction of [Ni(1,5-cod)<sub>2</sub>] with PEt<sub>3</sub> (1.5 equiv) and S<sub>8</sub> (0.06 equiv). For experimental details, see pages S8–S12. (?) indicates resonances that remains unassigned.

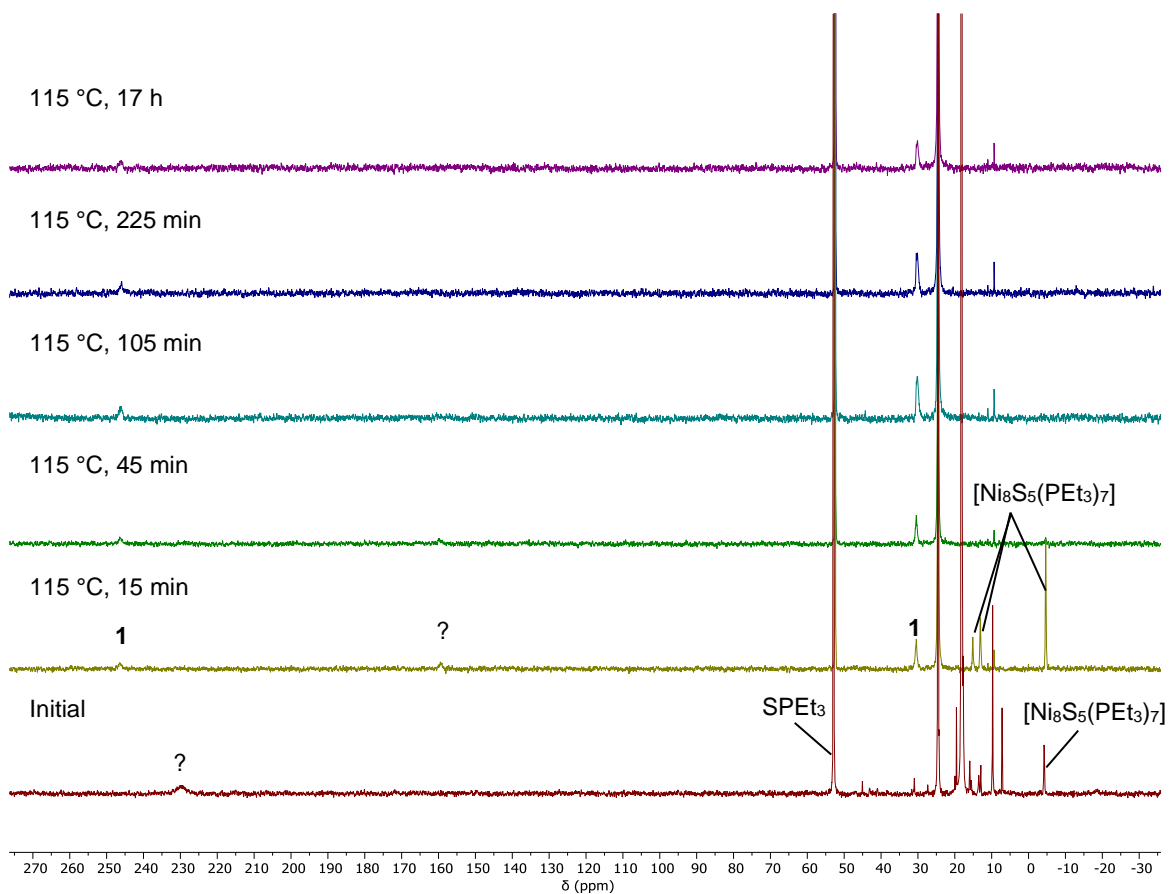

**Figure S7.**  $^{31}\text{P}\{^1\text{H}\}$  NMR (25 °C, toluene- $d_8$ ) spectra of the reaction of  $[\text{Ni}(1,5\text{-cod})_2]$  with  $\text{PEt}_3$  (1.5 equiv) and  $\text{S}_8$  (0.06 equiv). For experimental details, see pages S8–S12.

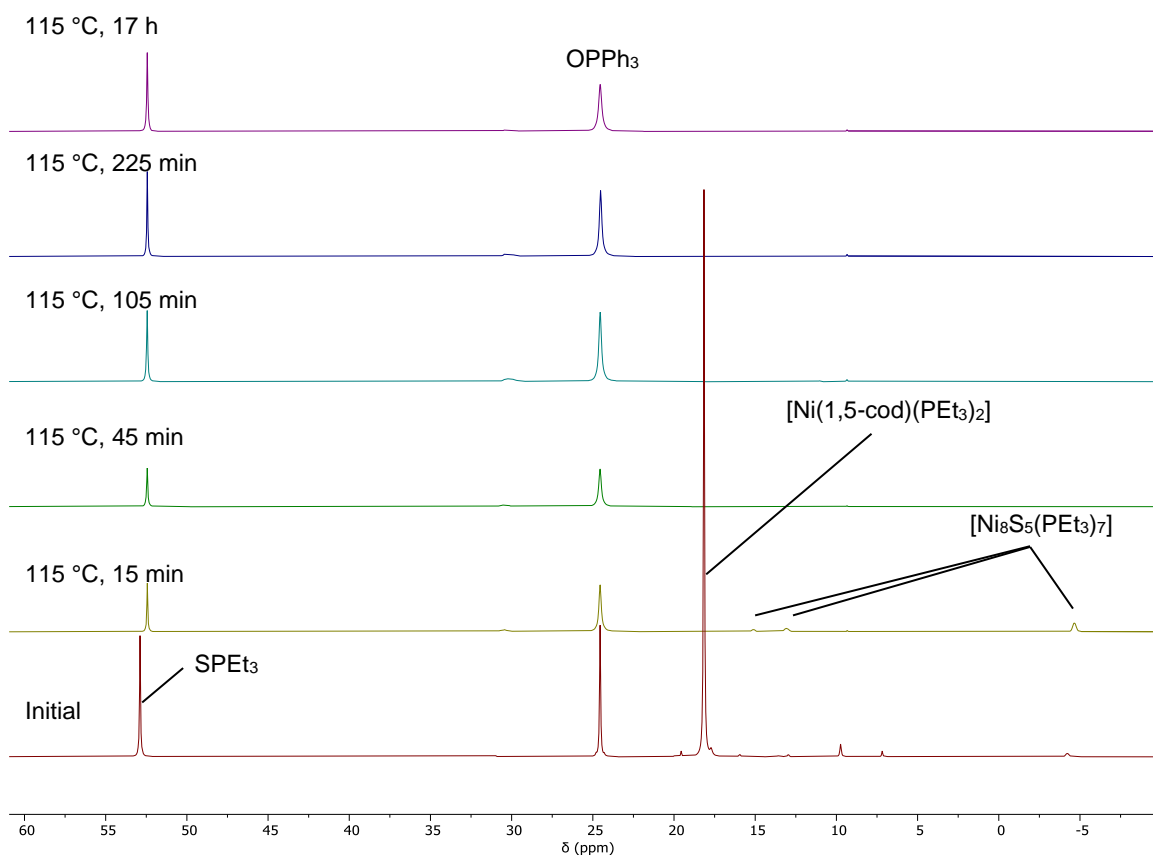

**Figure S8.** Partial  $^{31}\text{P}\{^1\text{H}\}$  NMR (25 °C, toluene- $d_8$ ) spectra of the reaction of  $[\text{Ni}(1,5\text{-cod})_2]$  with  $\text{PEt}_3$  (1.5 equiv) and  $\text{S}_8$  (0.06 equiv). For experimental details, see pages S8–S12.

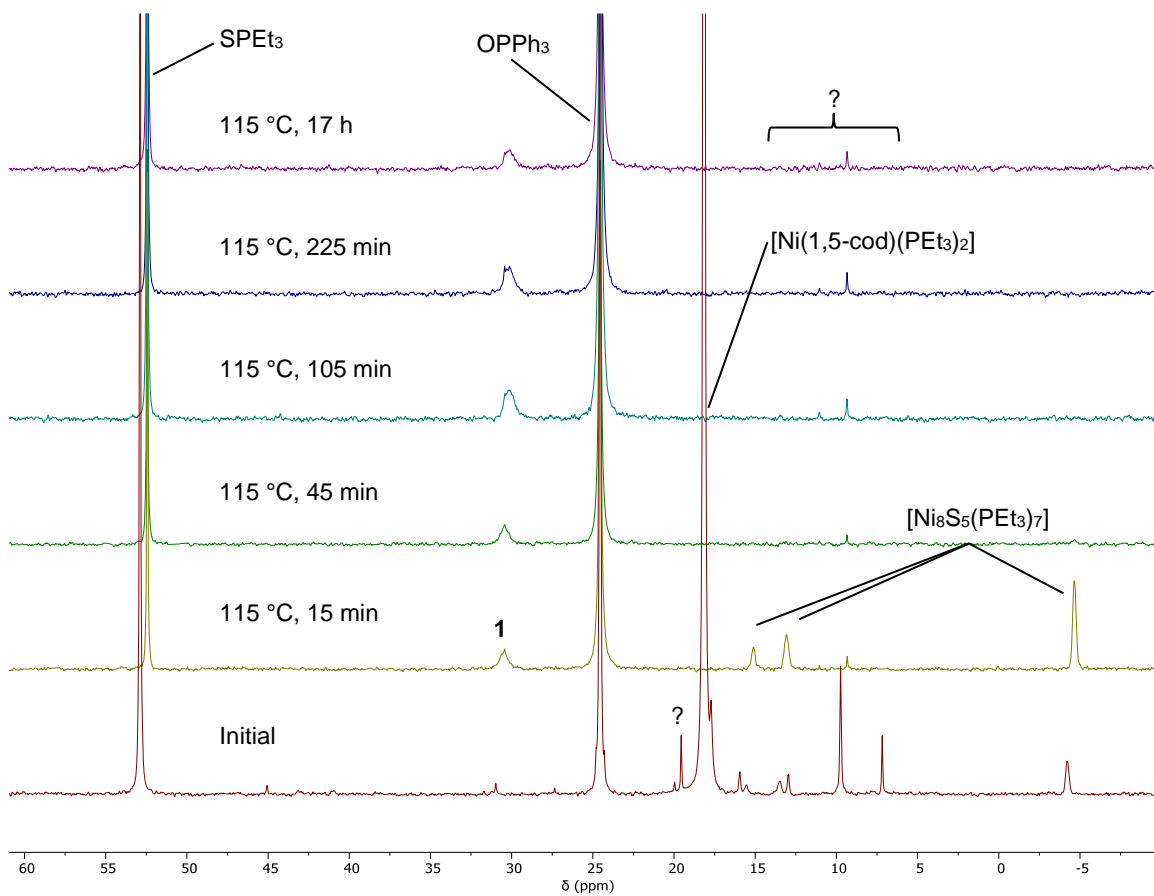

**Figure S9.** Partial  $^{31}\text{P}\{^1\text{H}\}$  NMR (25 °C, toluene- $d_8$ ) spectra of the reaction of  $[\text{Ni}(1,5\text{-cod})_2]$  with  $\text{PEt}_3$  (1.5 equiv) and  $\text{S}_8$  (0.06 equiv). For experimental details, see pages S8–S12.



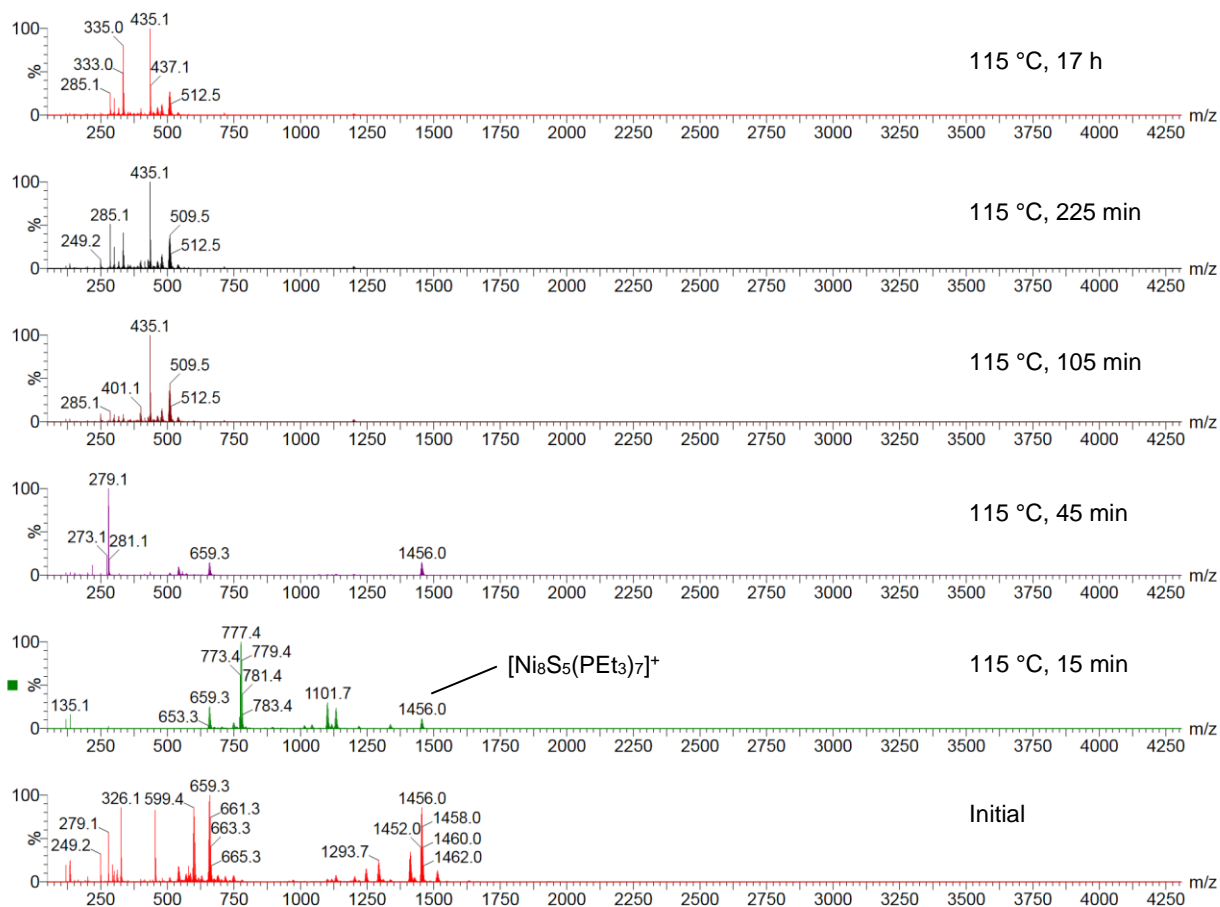

**Figure S10.** ESI-MS (THF, positive ion mode, 2.50 kV) of the reaction of  $[\text{Ni}(1,5\text{-cod})_2]$  with  $\text{PEt}_3$  (1.5 equiv) and  $\text{S}_8$  (0.06 equiv). For experimental details, see pages S8–S12.

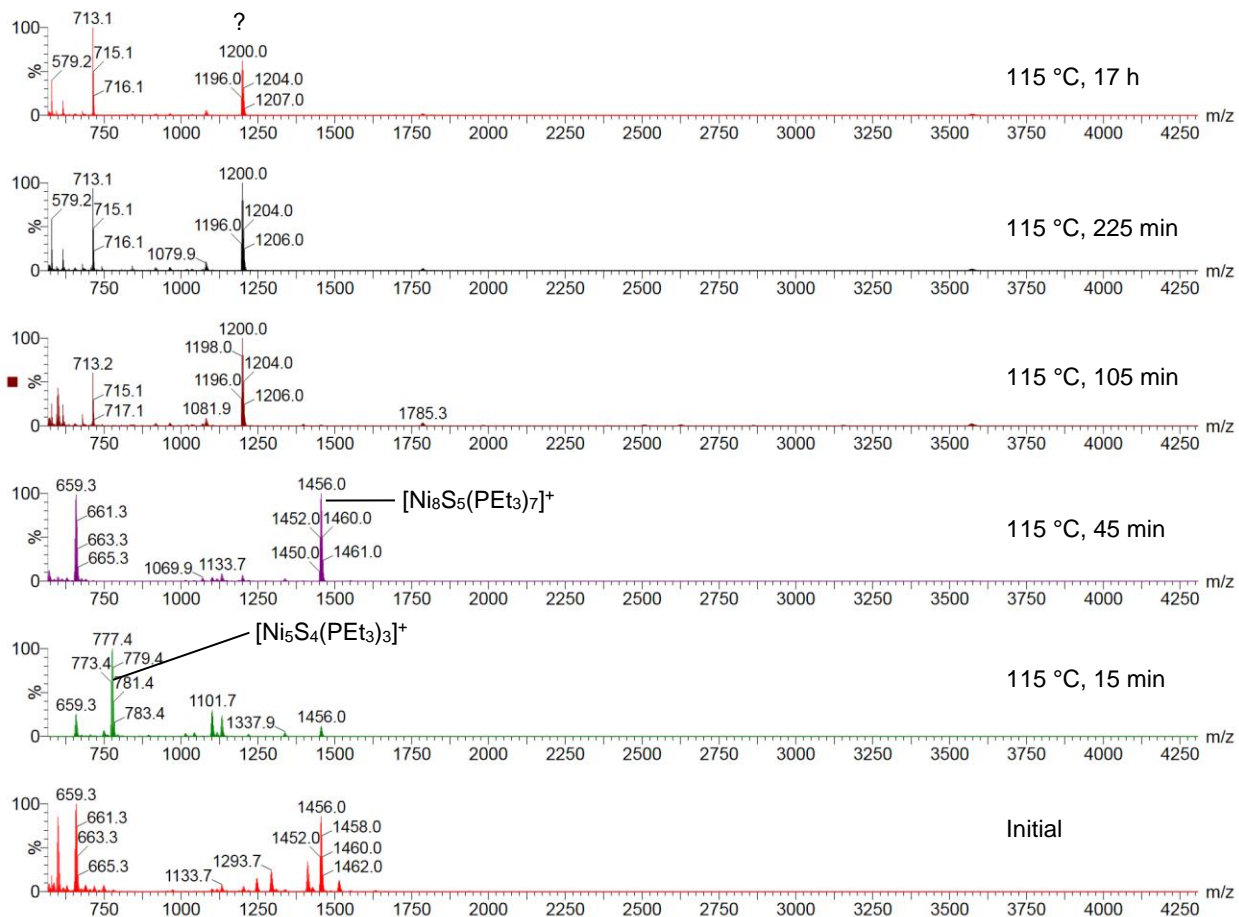

**Figure S11.** Partial ESI-MS (THF, positive ion mode, 2.50 kV) spectra of the reaction of  $[\text{Ni}(1,5\text{-cod})_2]$  with  $\text{PEt}_3$  (1.5 equiv) and  $\text{S}_8$  (0.06 equiv). Each spectrum is of a dried aliquot of the reaction mixture dissolved in THF. The prominent peak (marked with a ?) at 1200.0 m/z in the 17 h, 225 min, and 105 min spectra could not be definitively assigned; however, the molecular weight and isotope pattern suggests it is a  $\text{Ni}_6$  cluster. For experimental details, see pages S8–S12.

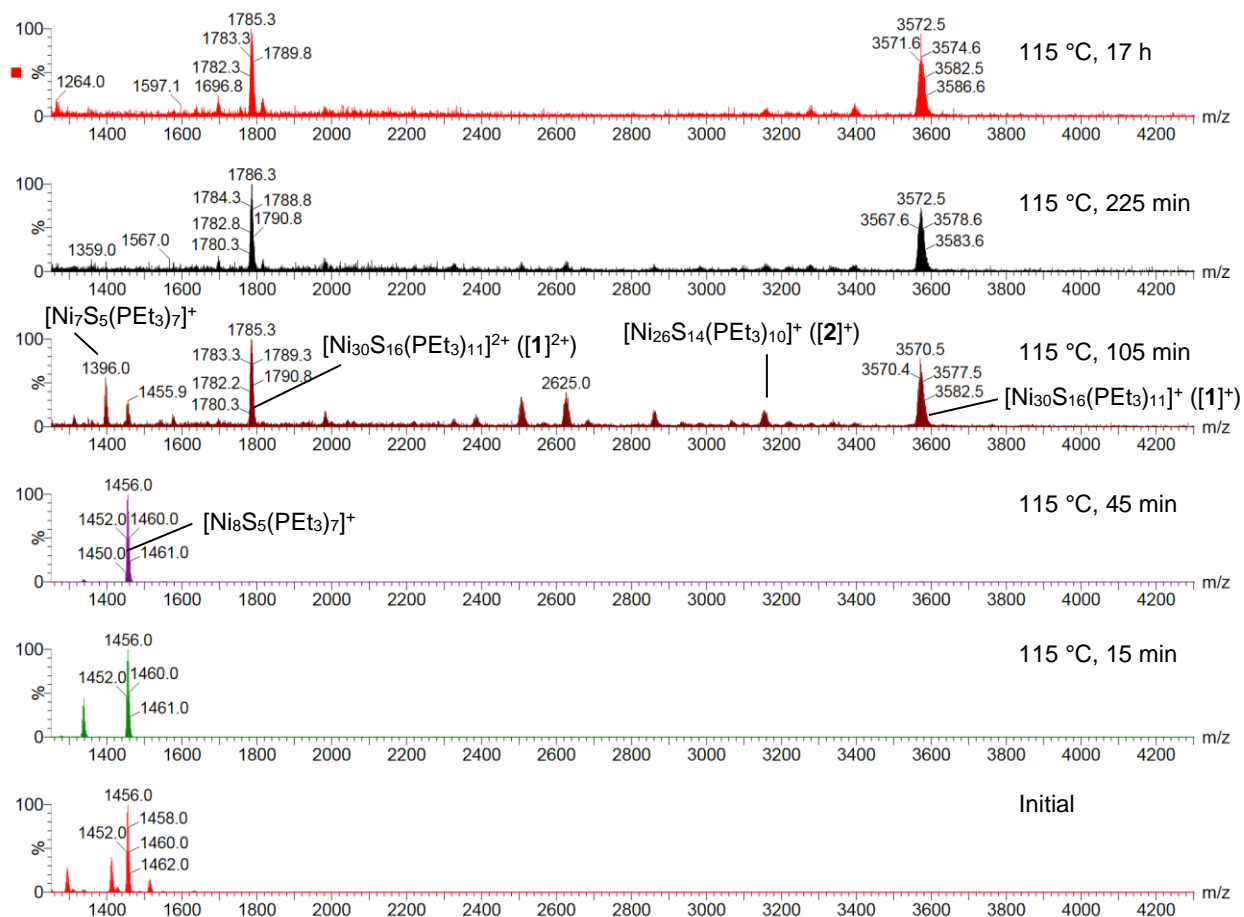

**Figure S12.** Partial ESI-MS (THF, positive ion mode, 2.50 kV) spectra of the reaction of  $[\text{Ni}(\text{1,5-cod})_2]$  with  $\text{PEt}_3$  (1.5 equiv) and  $\text{S}_8$  (0.06 equiv). For experimental details, see pages S8–S12.

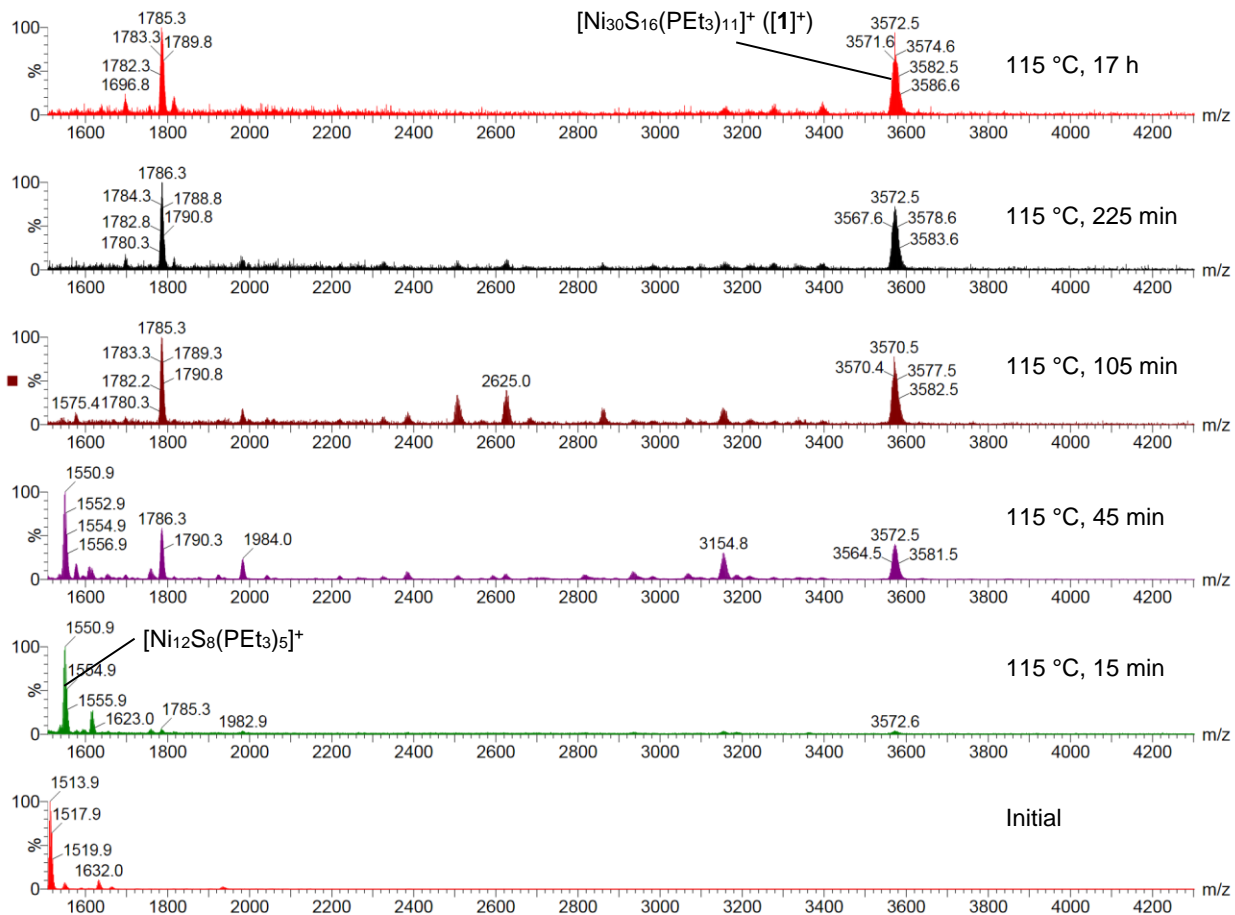

**Figure S13.** Partial ESI-MS (THF, positive ion mode, 2.50 kV) spectra of the reaction of  $[\text{Ni}(1,5\text{-cod})_2]$  with  $\text{PEt}_3$  (1.5 equiv) and  $\text{S}_8$  (0.06 equiv). For experimental details, see pages S8–S12.

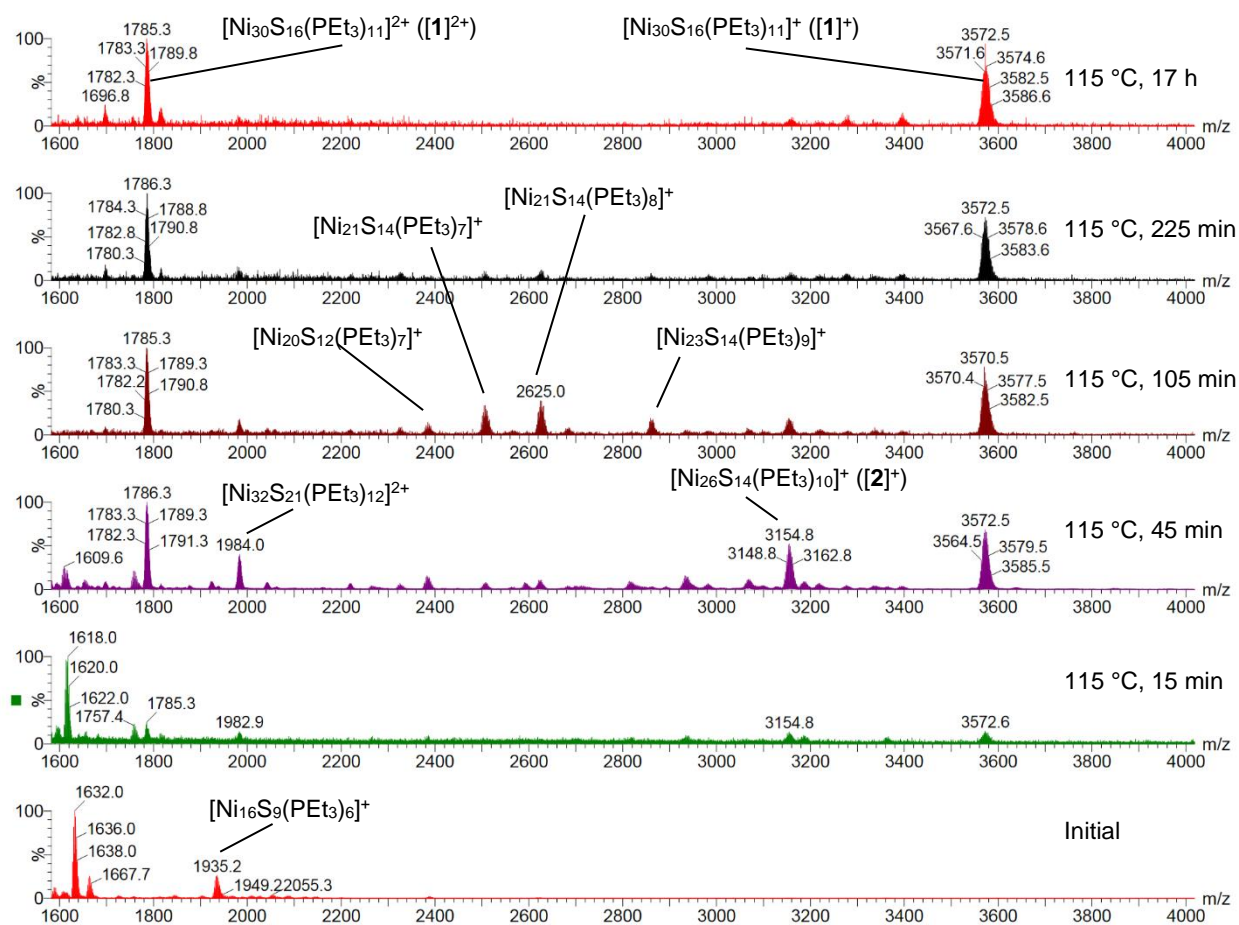

**Figure S14.** Partial ESI-MS (THF, positive ion mode, 2.50 kV) spectra of the reaction of  $[\text{Ni}(1,5\text{-cod})_2]$  with  $\text{PEt}_3$  (1.5 equiv) and  $\text{S}_8$  (0.06 equiv). For experimental details, see pages S8–S12.

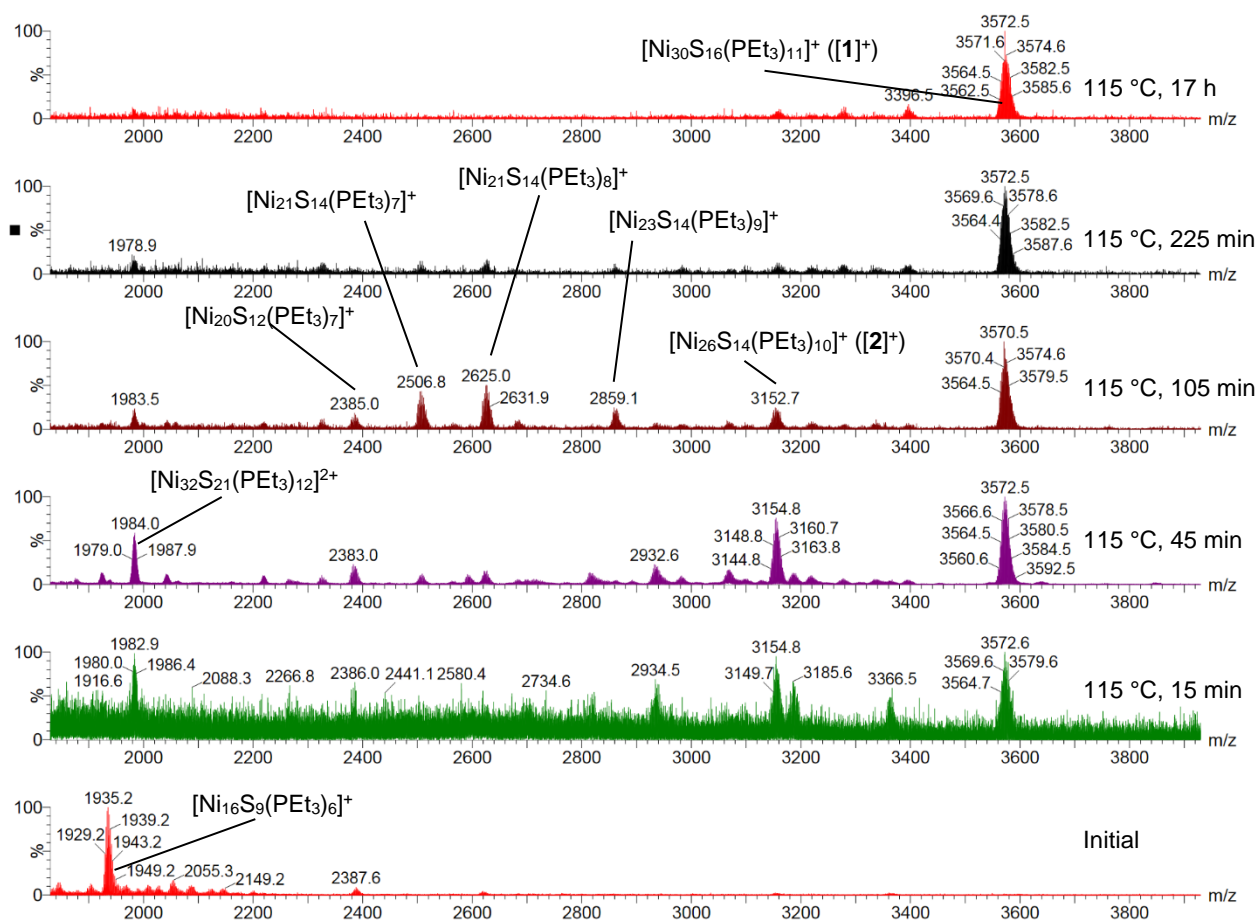

**Figure S15.** Partial ESI-MS (THF, positive ion mode, 2.50 kV) spectra of the reaction of  $[\text{Ni}(1,5\text{-cod})_2]$  with  $\text{PEt}_3$  (1.5 equiv) and  $\text{S}_8$  (0.06 equiv). For experimental details, see pages S8–S12.

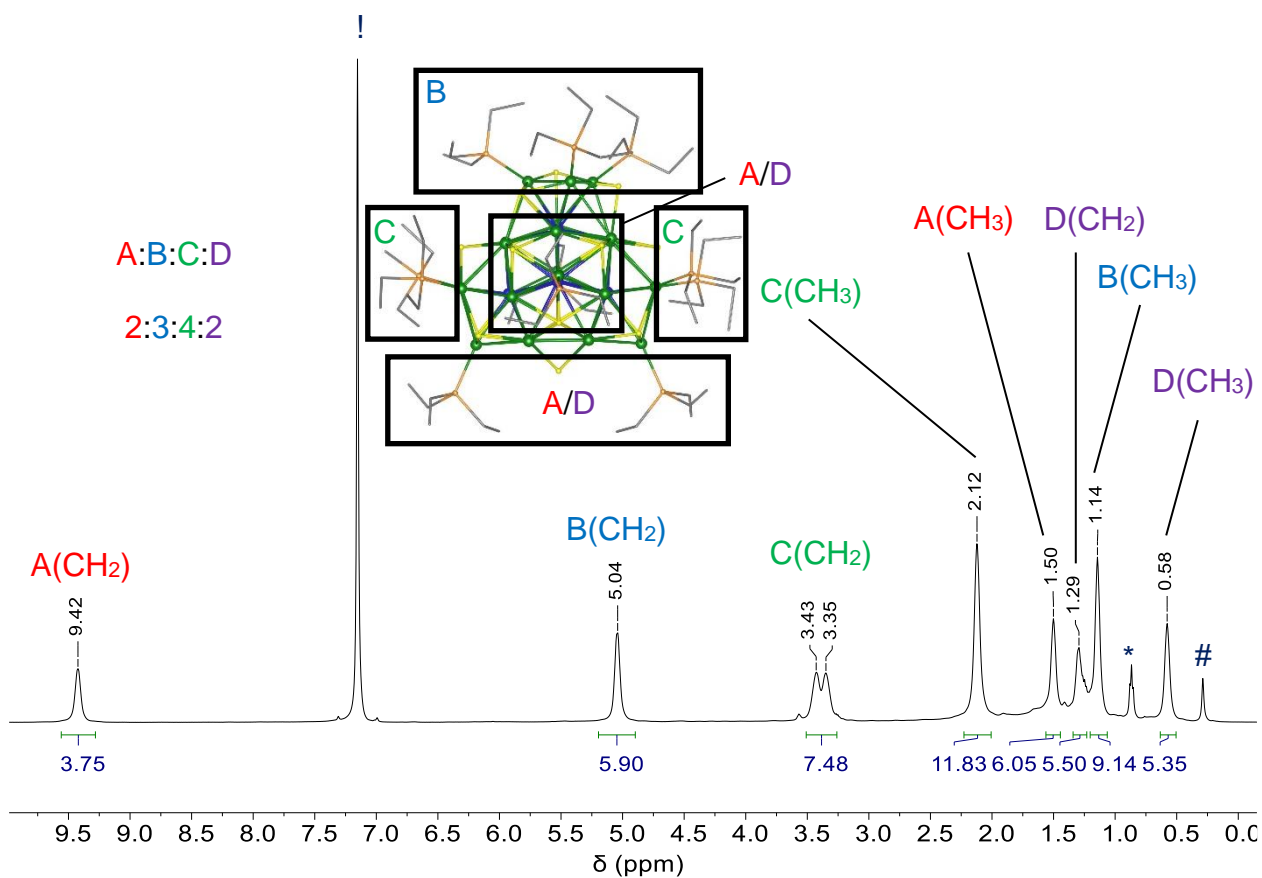

**Figure S16.**  $^1\text{H}$  NMR (500 MHz, 25 °C, benzene- $d_6$ ) spectrum of  $[\text{Ni}_{30}\text{S}_{16}(\text{PEt}_3)_{11}]$  (**1**).

(\*) indicates the presence of *n*-pentane.<sup>13</sup> (#) indicates the presence of silicone grease.<sup>13</sup> (!) indicates a resonance assignable to benzene.<sup>13</sup>

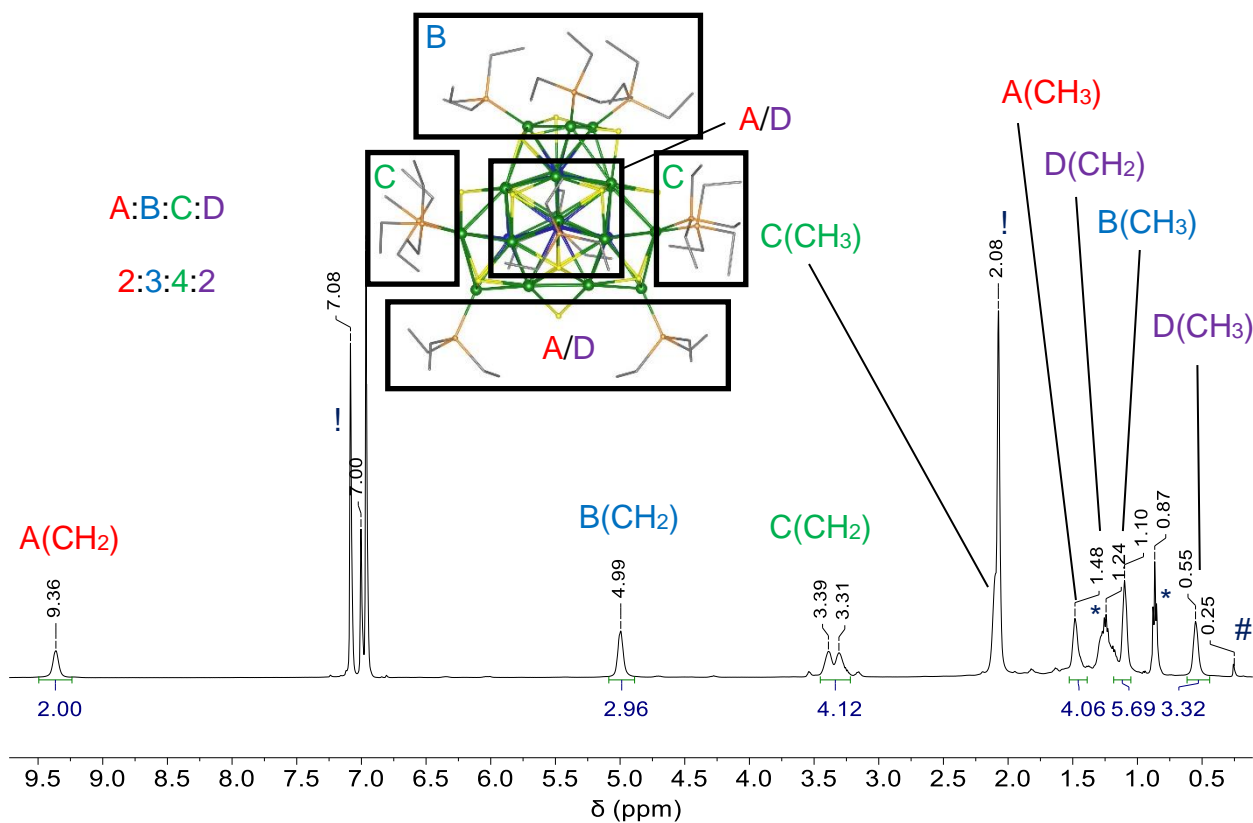

**Figure S17.**  $^1\text{H}$  NMR (500 MHz, 25 °C,  $\text{toluene-}d_8$ ) spectrum of  $[\text{Ni}_{30}\text{S}_{16}(\text{PEt}_3)_{11}]$  (1).

(\*) indicates the presence of *n*-pentane.<sup>13</sup> (#) indicates the presence of silicone grease.<sup>13</sup> (!) indicates resonances assignable to toluene.<sup>13</sup>



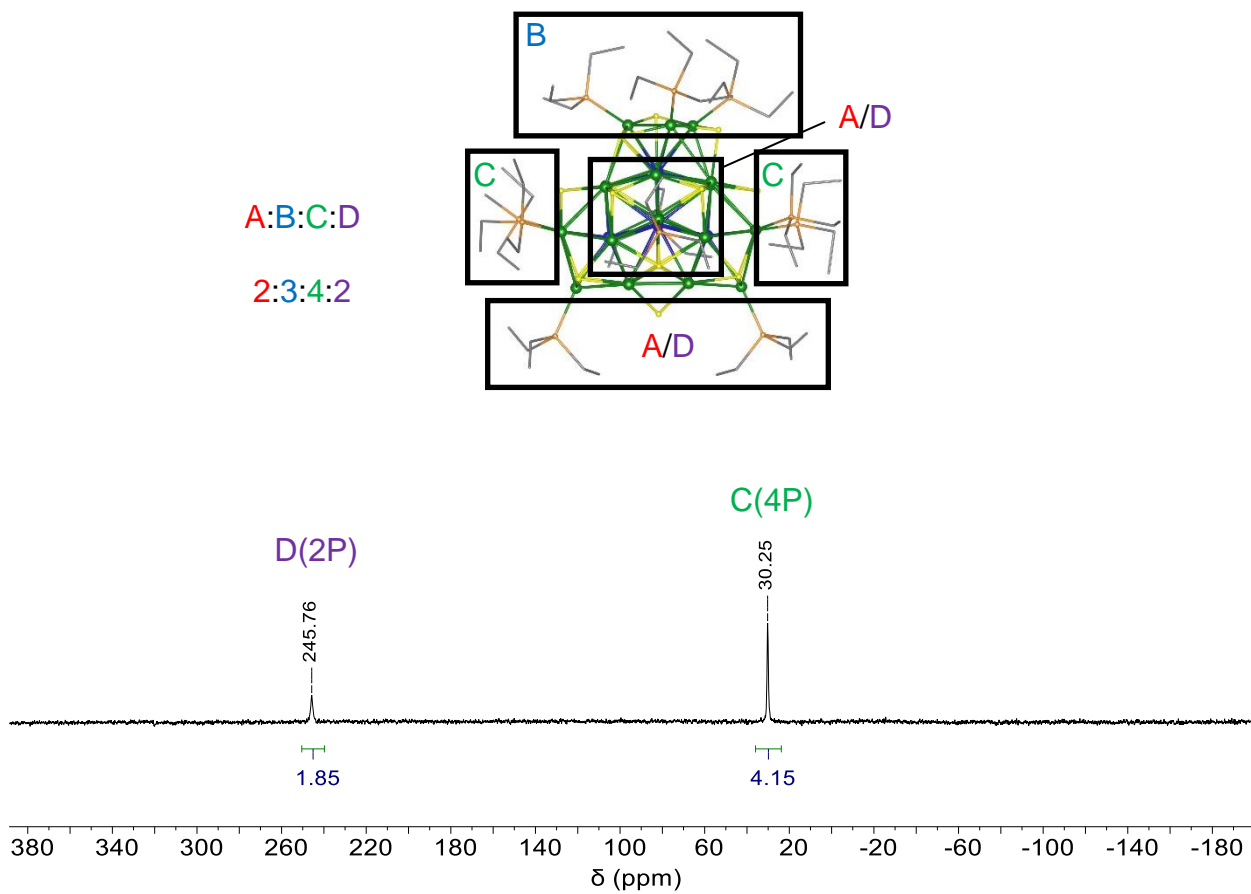

**Figure S 18.** Partial  $^{31}\text{P}\{^1\text{H}\}$  NMR (202 MHz, 25 °C, toluene- $d_8$ ) spectrum of  $[\text{Ni}_{30}\text{S}_{16}(\text{PEt}_3)_{11}]$  (**1**) from -200 ppm to 400 ppm.

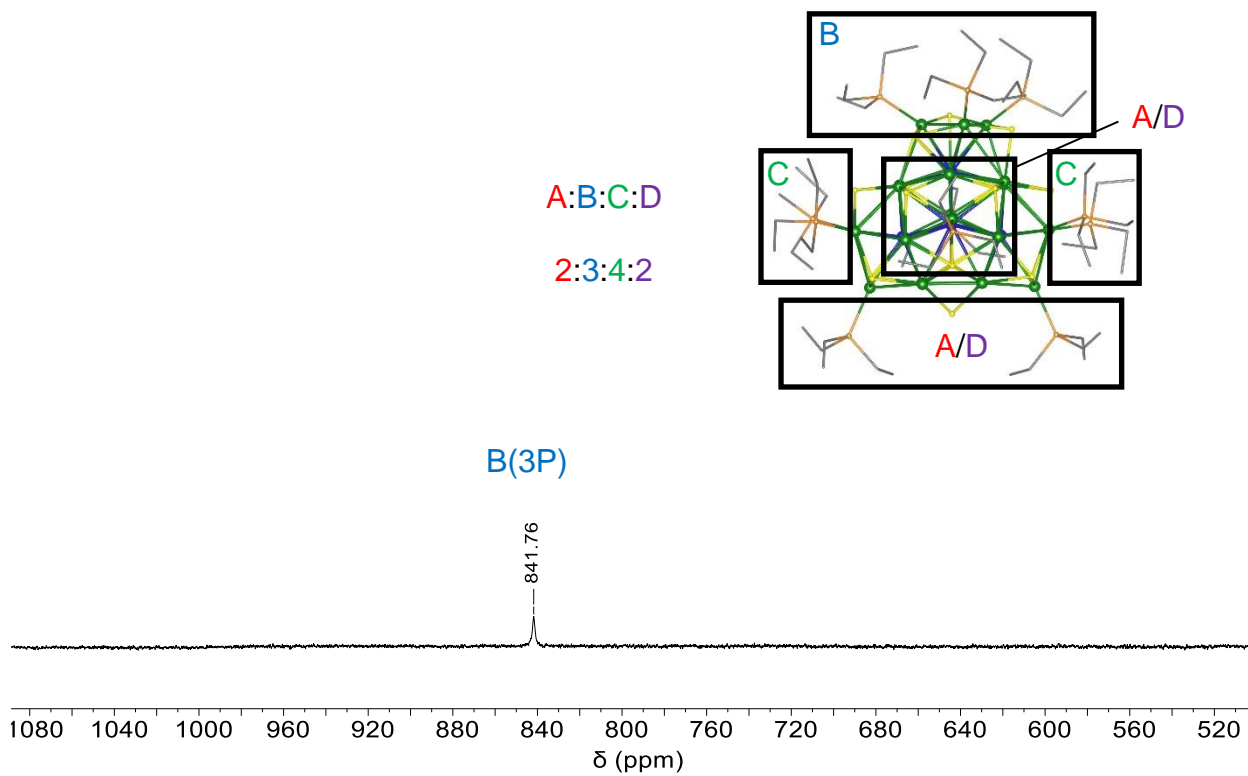

**Figure S 19.** Partial  $^{31}\text{P}\{^1\text{H}\}$  NMR (202 MHz, 25 °C, toluene- $d_8$ ) spectrum of  $[\text{Ni}_{30}\text{S}_{16}(\text{PEt}_3)_{11}]$  (**1**) from 500 ppm to 1100 ppm.

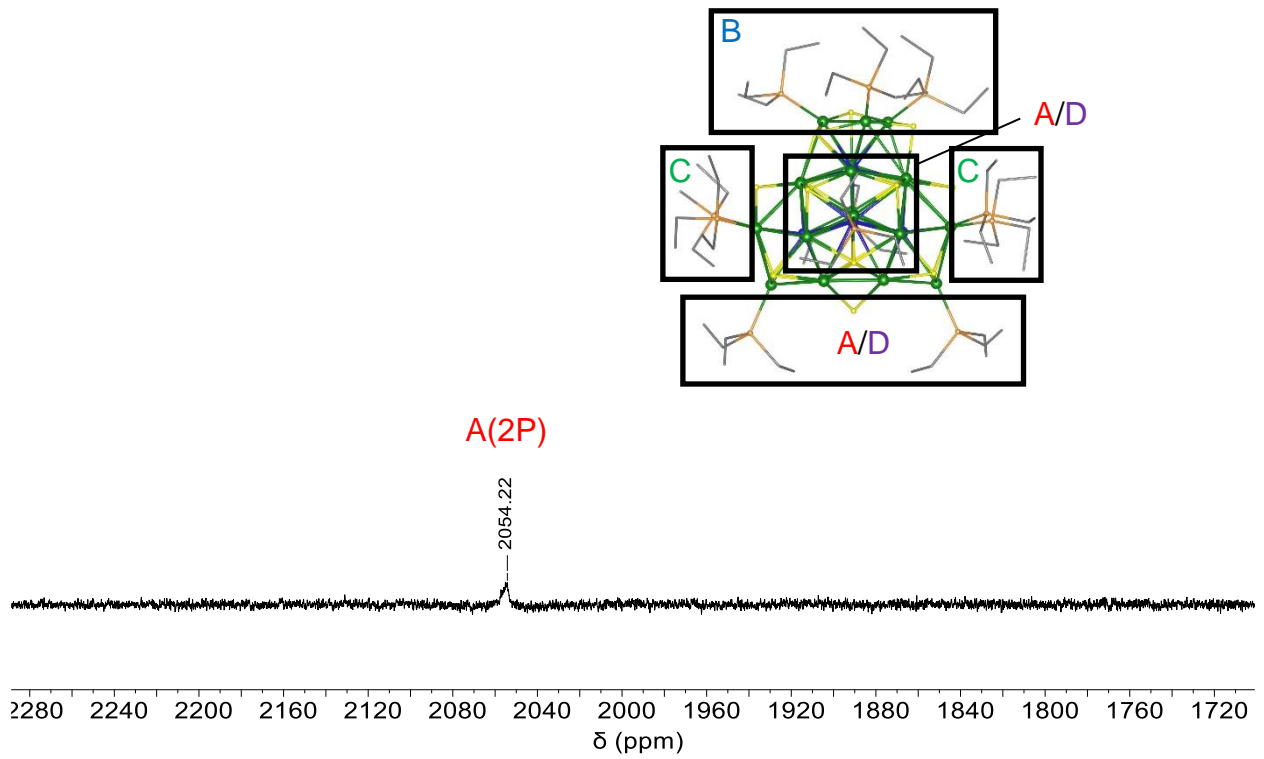

**Figure S 20.** Partial  $^{31}\text{P}\{^1\text{H}\}$  NMR (202 MHz, 25 °C, toluene- $d_8$ ) spectrum of  $[\text{Ni}_{30}\text{S}_{16}(\text{PEt}_3)_{11}]$  (**1**) from 1700 ppm to 2289 ppm.

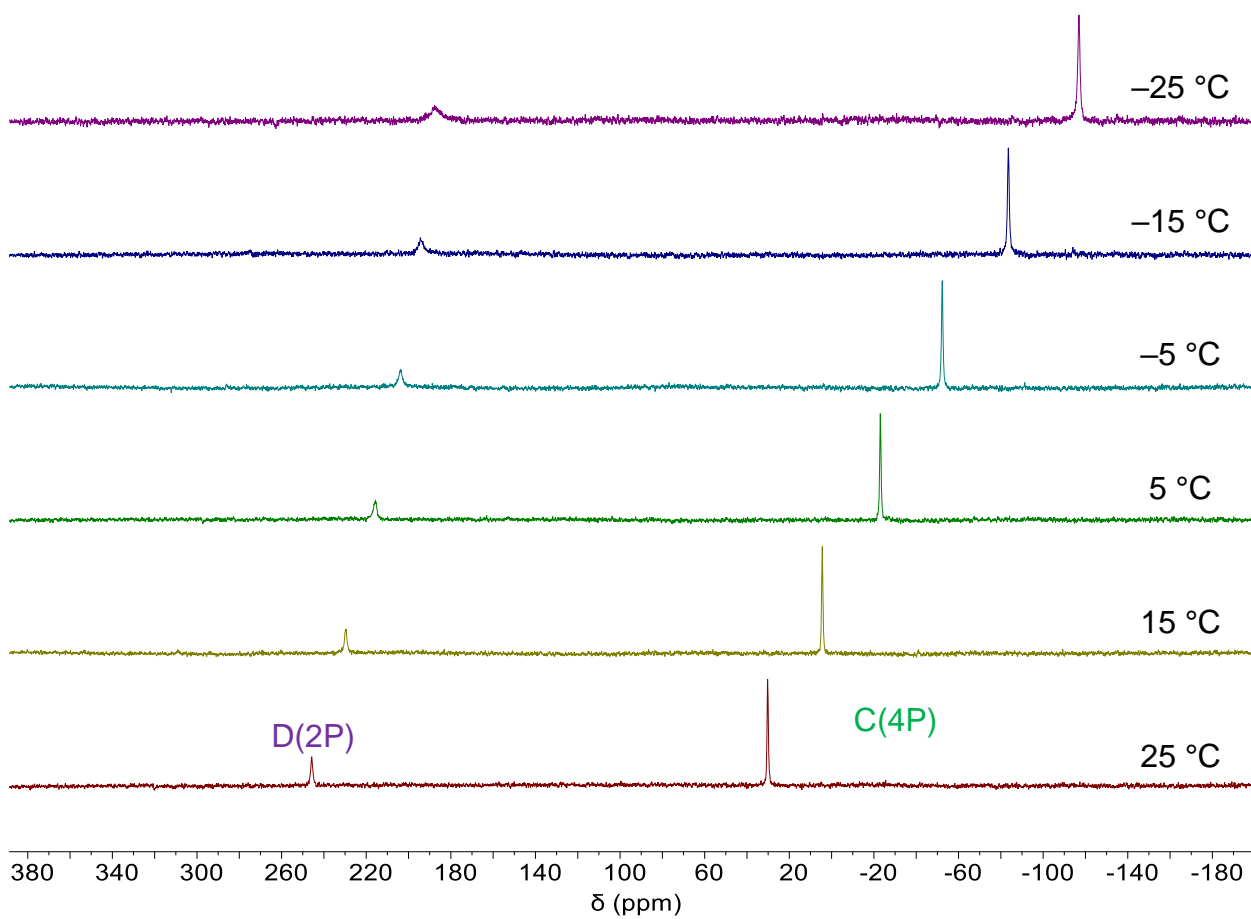

**Figure S 21.** Variable temperature partial  $^{31}\text{P}\{^1\text{H}\}$  NMR (202 MHz, toluene- $d_8$ ) spectrum of  $[\text{Ni}_{30}\text{S}_{16}(\text{PEt}_3)_{11}]$  (**1**) from -200 ppm to 400 ppm and from 25 °C to -25 °C.

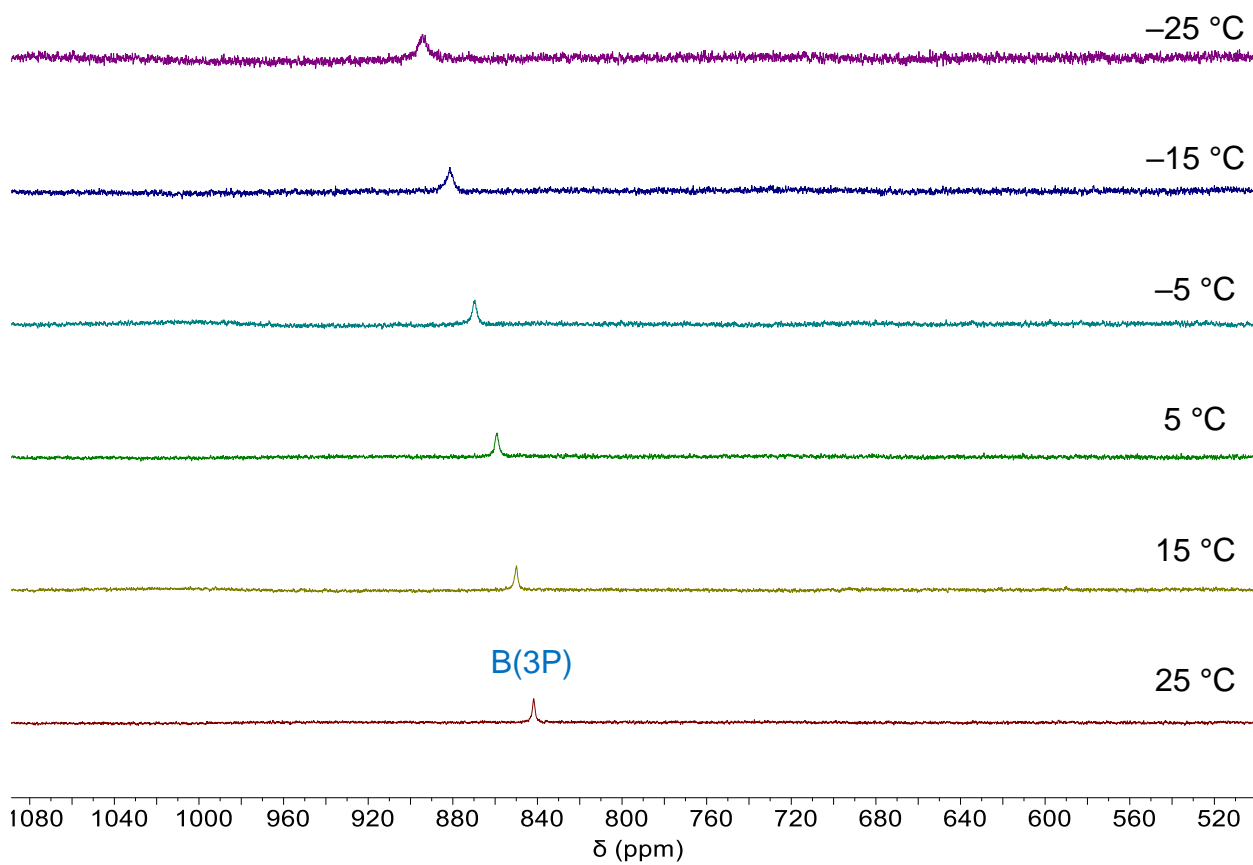

**Figure S 22.** Variable temperature partial  $^{31}\text{P}\{^1\text{H}\}$  NMR (202 MHz,  $\text{toluene-}d_8$ ) spectrum of  $[\text{Ni}_{30}\text{S}_{16}(\text{PEt}_3)_{11}]$  (**1**) from 500 ppm to 1100 ppm and from  $25\text{ }^\circ\text{C}$  to  $-25\text{ }^\circ\text{C}$ .

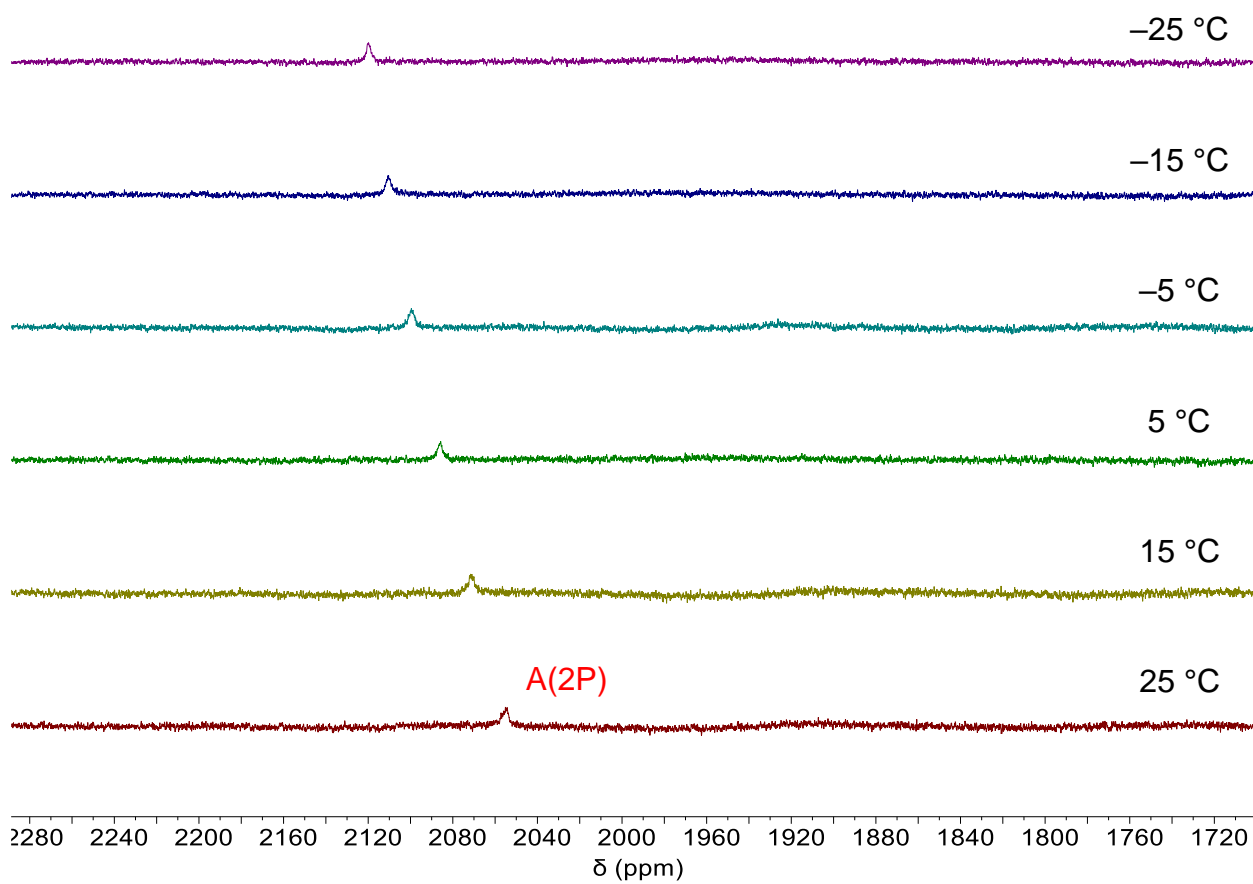

**Figure S 23.** Variable temperature partial  $^{31}\text{P}\{^1\text{H}\}$  NMR (202 MHz, toluene- $d_8$ ) spectrum of  $[\text{Ni}_{30}\text{S}_{16}(\text{PEt}_3)_{11}]$  (**1**) from 1700 ppm to 2289 ppm and from  $25\text{ }^\circ\text{C}$  to  $-25\text{ }^\circ\text{C}$ .

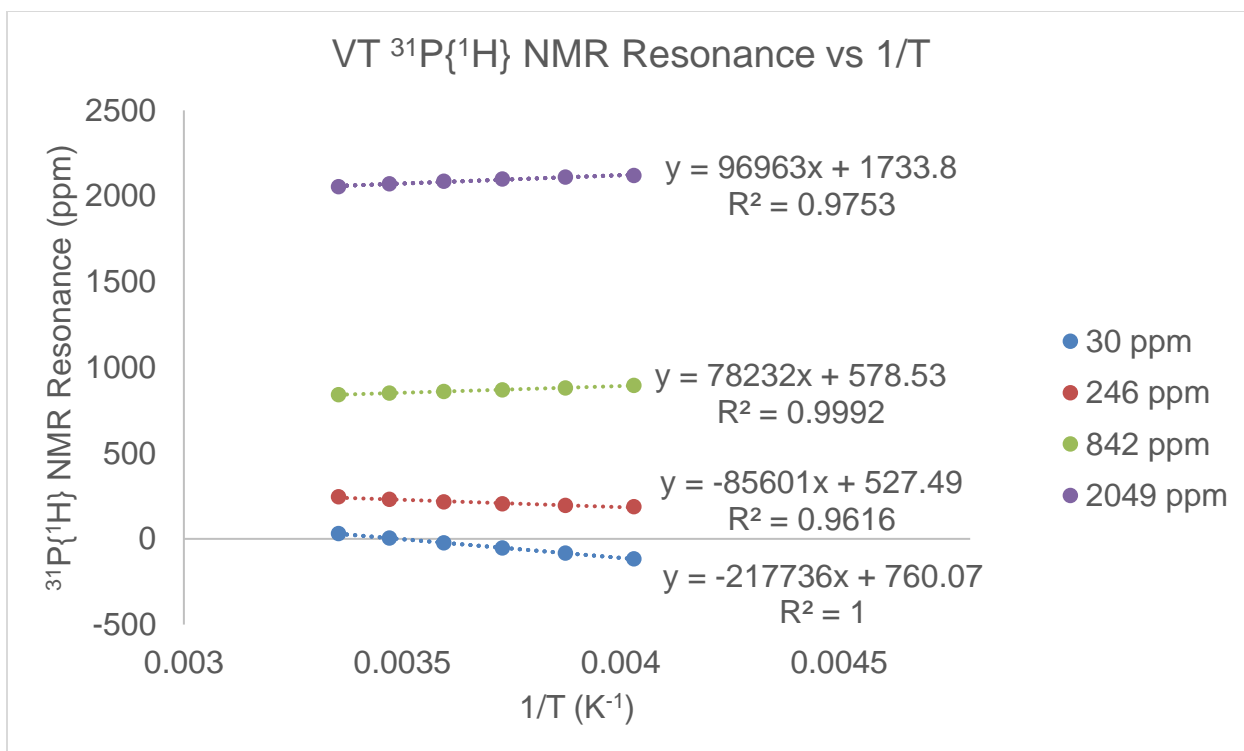

**Figure S24.** A plot of  $^{31}\text{P}\{^1\text{H}\}$  NMR resonances of **1** in toluene- $d_8$  from 25 °C to -25 °C versus  $1/T$ . Linear trendlines are displayed for each  $^{31}\text{P}$  NMR assignment.

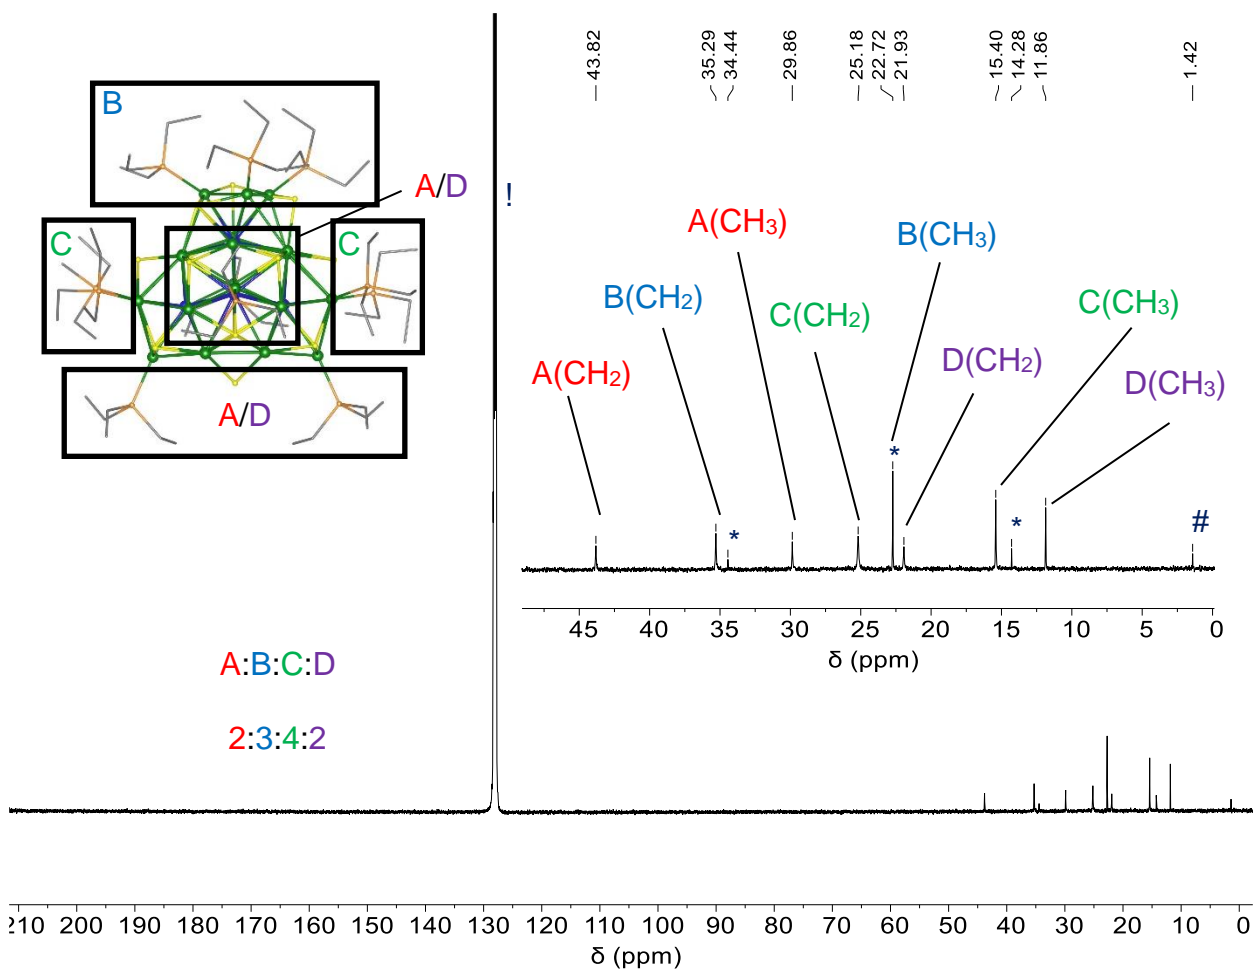

**Figure S25.**  $^{13}\text{C}\{^1\text{H}\}$  NMR (126 MHz, 25 °C, benzene- $d_6$ ) spectrum of  $[\text{Ni}_{30}\text{S}_{16}(\text{PEt}_3)_{11}]$  (**1**). The inset above shows a partial  $^{13}\text{C}\{^1\text{H}\}$  NMR spectrum 0 to 49 ppm. (\*) indicates the presence of *n*-pentane.<sup>13</sup> (#) indicates the presence of silicone grease.<sup>13</sup> (!) indicates a resonance assignable to benzene- $d_6$ .<sup>13</sup> The resonance at 22.72 ppm is assignable to  $\text{P}(\text{CH}_2\text{CH}_3)_3$  (*B*) overlapping with an *n*-pentane resonance.<sup>13</sup>



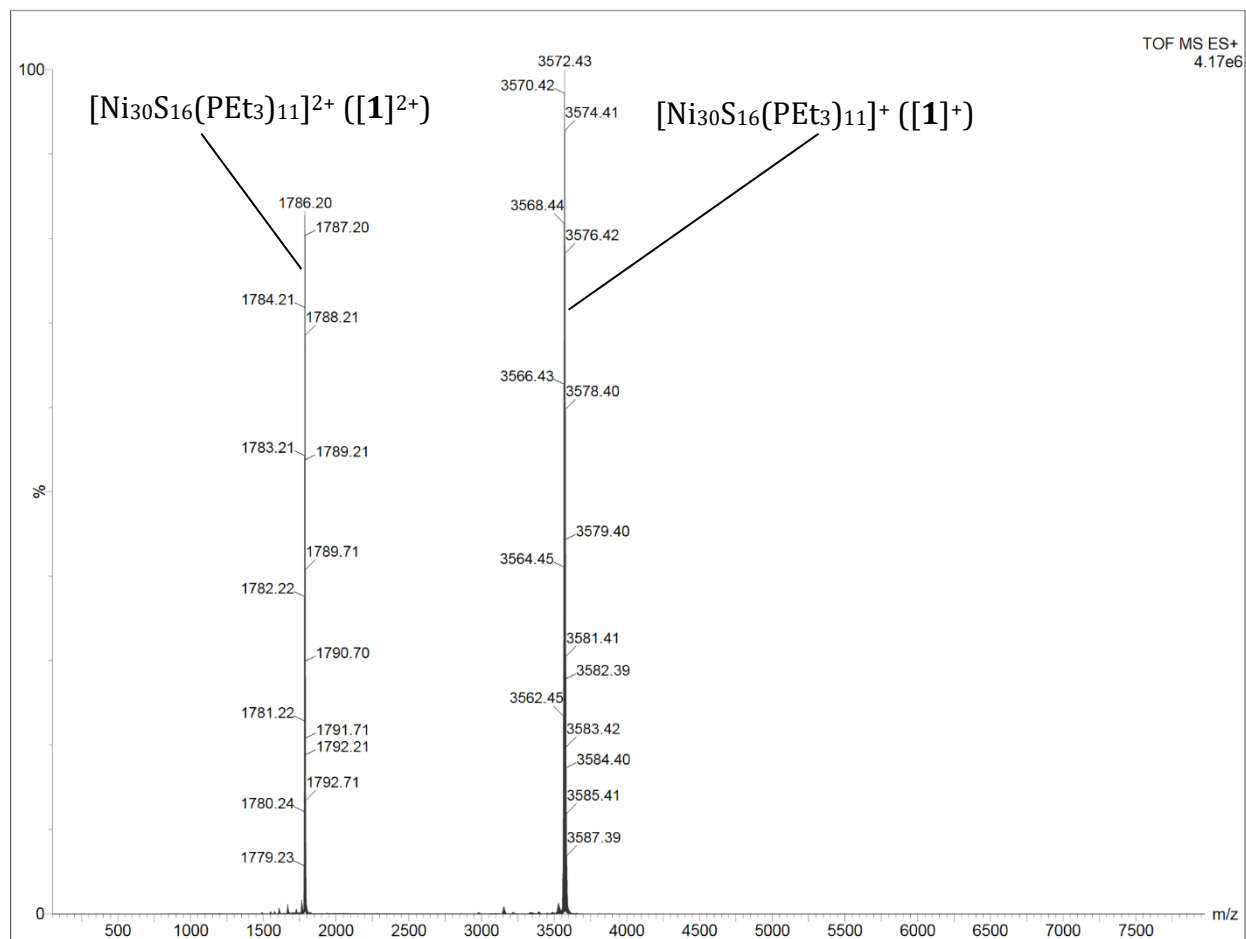

**Figure S26.** ESI-MS (positive ion mode) spectrum of  $[\text{Ni}_{30}\text{S}_{16}(\text{PEt}_3)_{11}]$  (**1**) taken in THF at a capillary voltage of 2.50 kV.

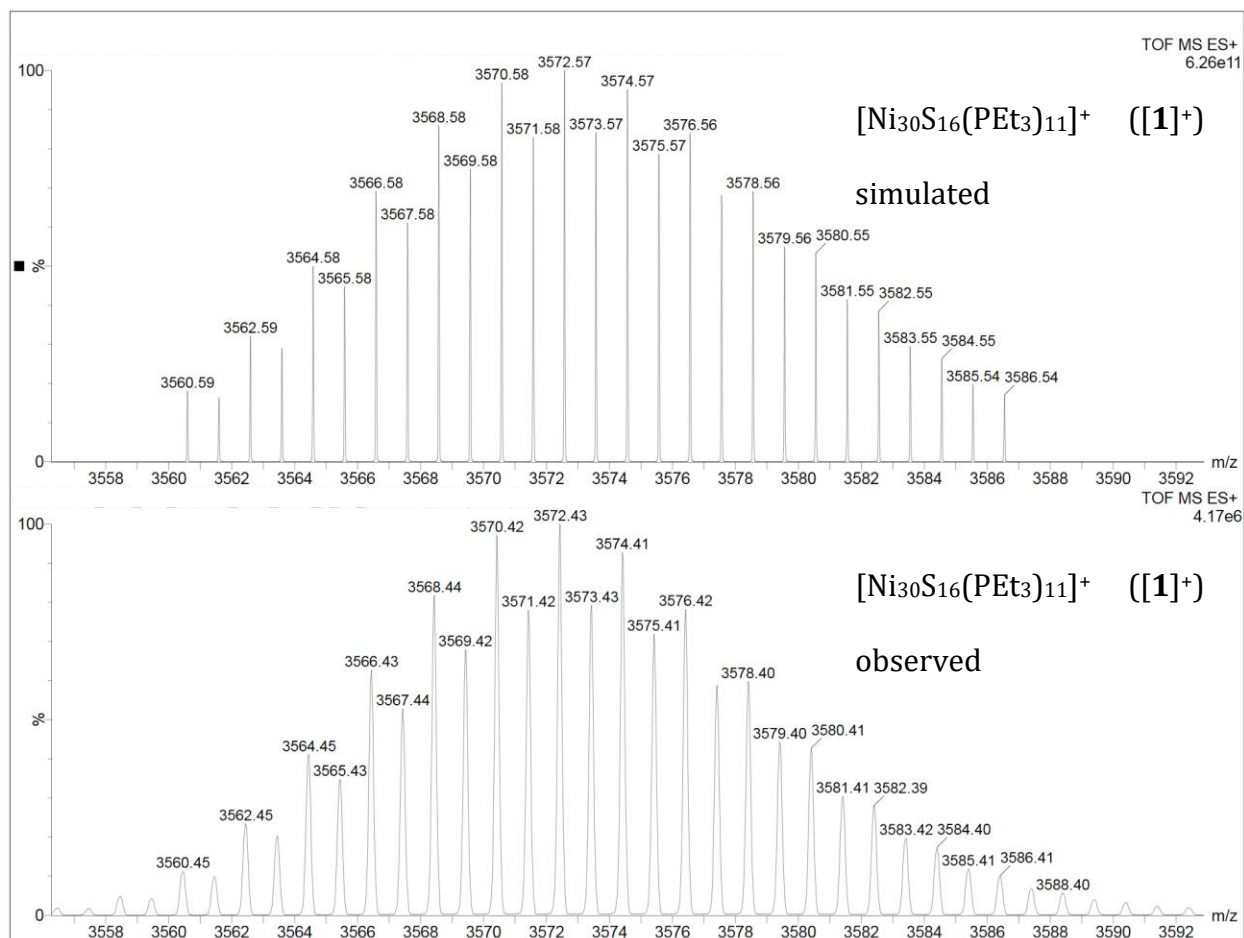

**Figure S27.** Partial ESI-MS (positive ion mode) spectrum of  $[\text{Ni}_{30}\text{S}_{16}(\text{PET}_3)_{11}]$  (**1**) taken in THF at a capillary voltage of 2.50 kV. Only the peak at 3572.43 m/z is displayed (bottom spectrum) with the simulated spectrum for  $[\text{Ni}_{30}\text{S}_{16}(\text{PET}_3)_{11}]^+$  ( $[\mathbf{1}]^+$ ) displayed above (top spectrum).

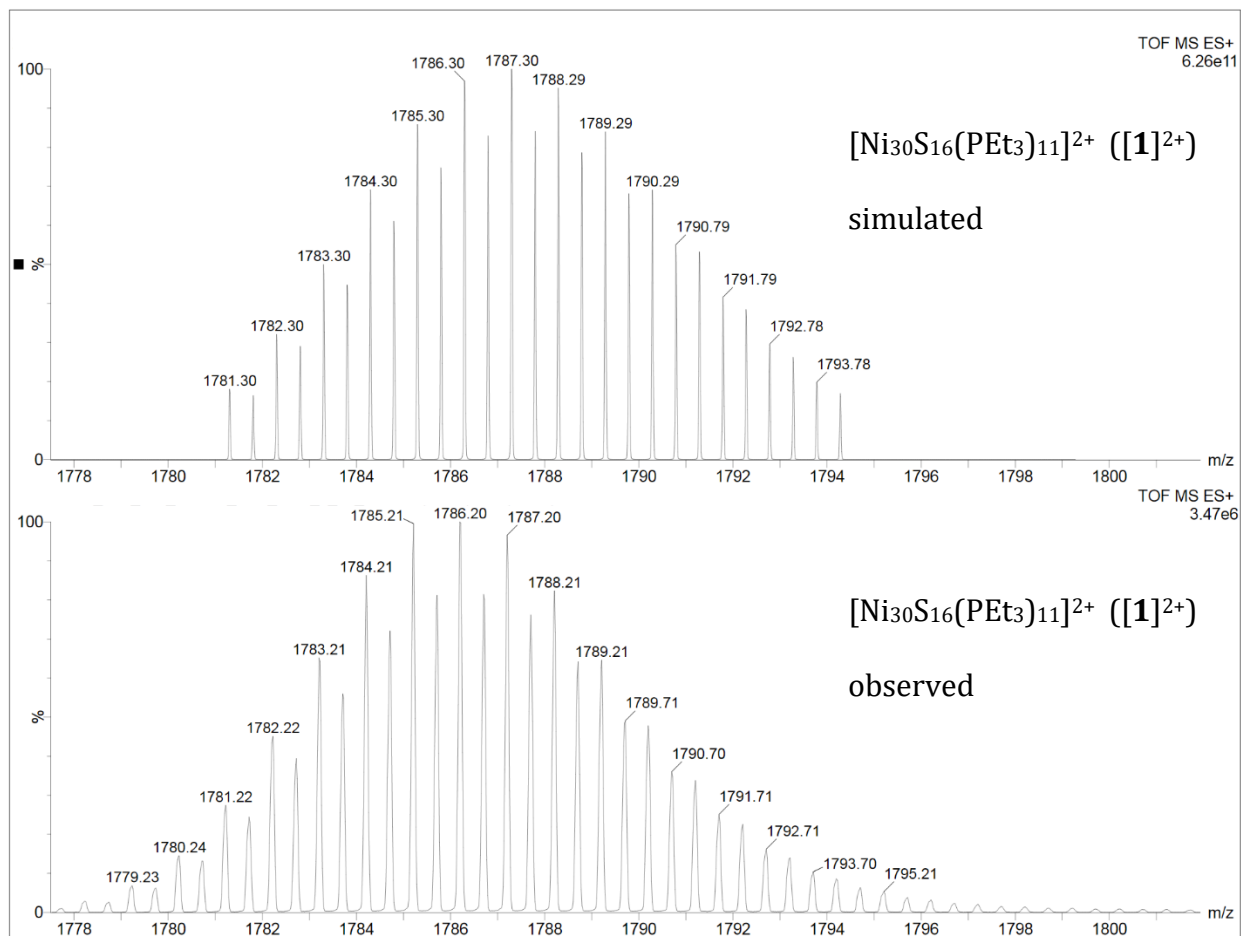

**Figure S28.** Partial ESI-MS (positive ion mode) spectrum of  $[\text{Ni}_{30}\text{S}_{16}(\text{PEt}_3)_{11}]$  (**1**) taken in THF at a capillary voltage of 2.50 kV. Only the peak at 1786.20 m/z is displayed (bottom spectrum) with the simulated spectrum for  $[\text{Ni}_{30}\text{S}_{16}(\text{PEt}_3)_{11}]^{2+}$  ( $[\mathbf{1}]^{2+}$ ) displayed above (top spectrum).

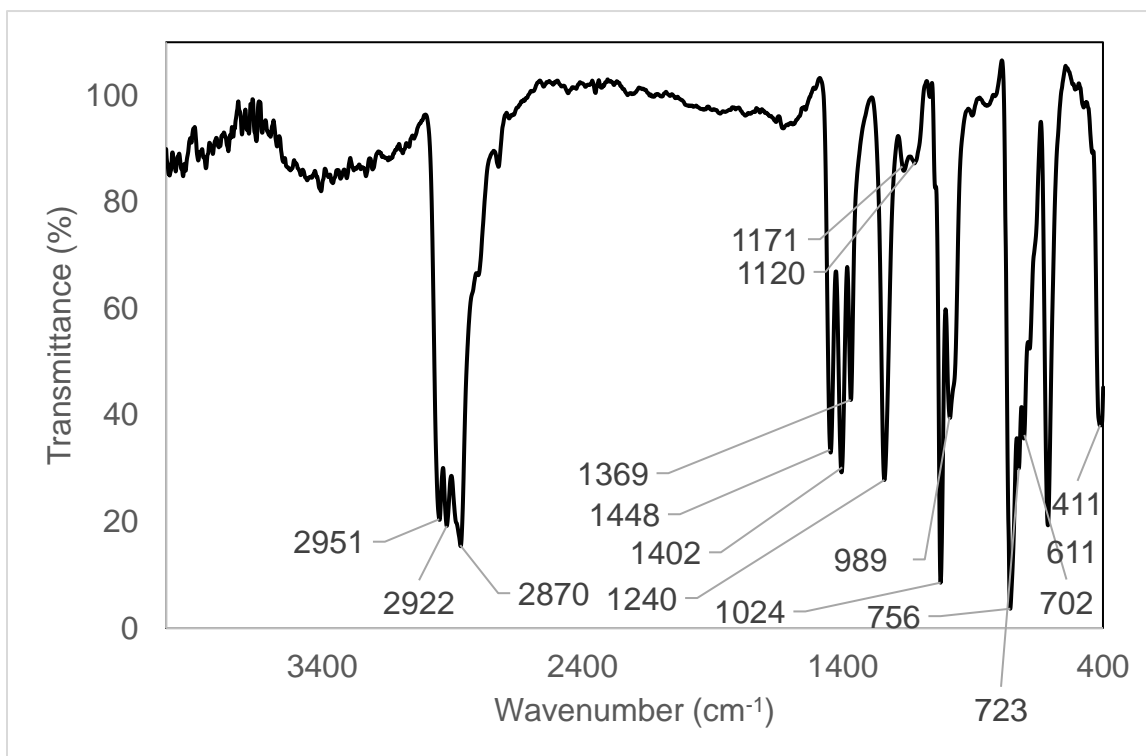

**Figure S29.** IR spectrum of  $[\text{Ni}_{30}\text{S}_{16}(\text{PEt}_3)_{11}]$  (**1**) (KBr pellet).

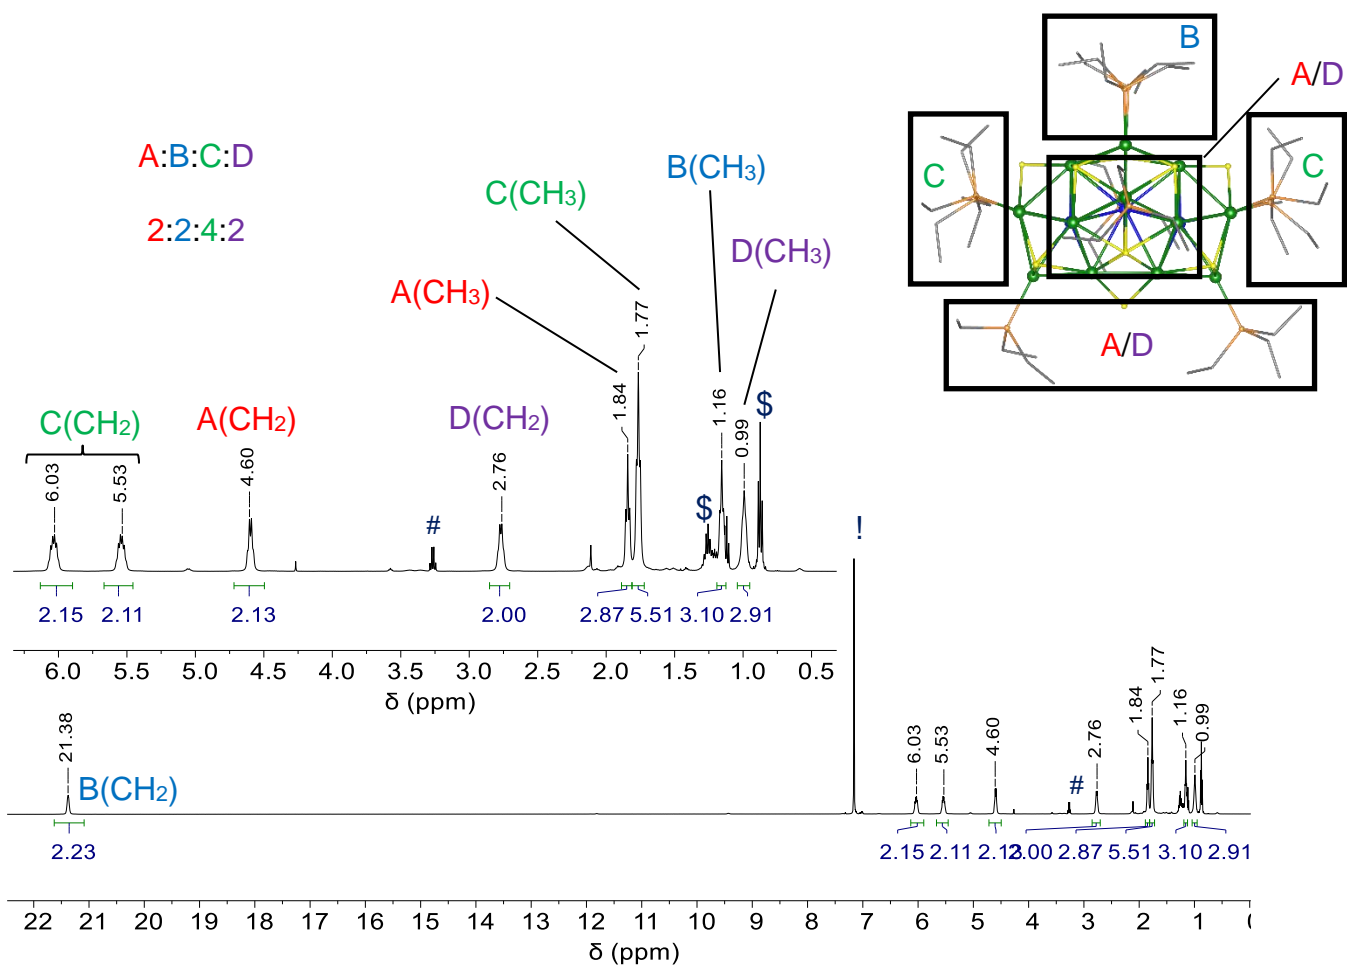

**Figure S30.**  $^1\text{H}$  NMR (500 MHz, 25 °C, benzene- $d_6$ ) spectrum of  $[\text{Ni}_{26}\text{S}_{14}(\text{PEt}_3)_{10}]$  (**2**).

(\$) indicates the presence of *n*-pentane.<sup>13</sup> (!) indicates a resonance assignable to benzene.<sup>13</sup> (#) indicates a resonance assignable to diethyl ether.<sup>13</sup>

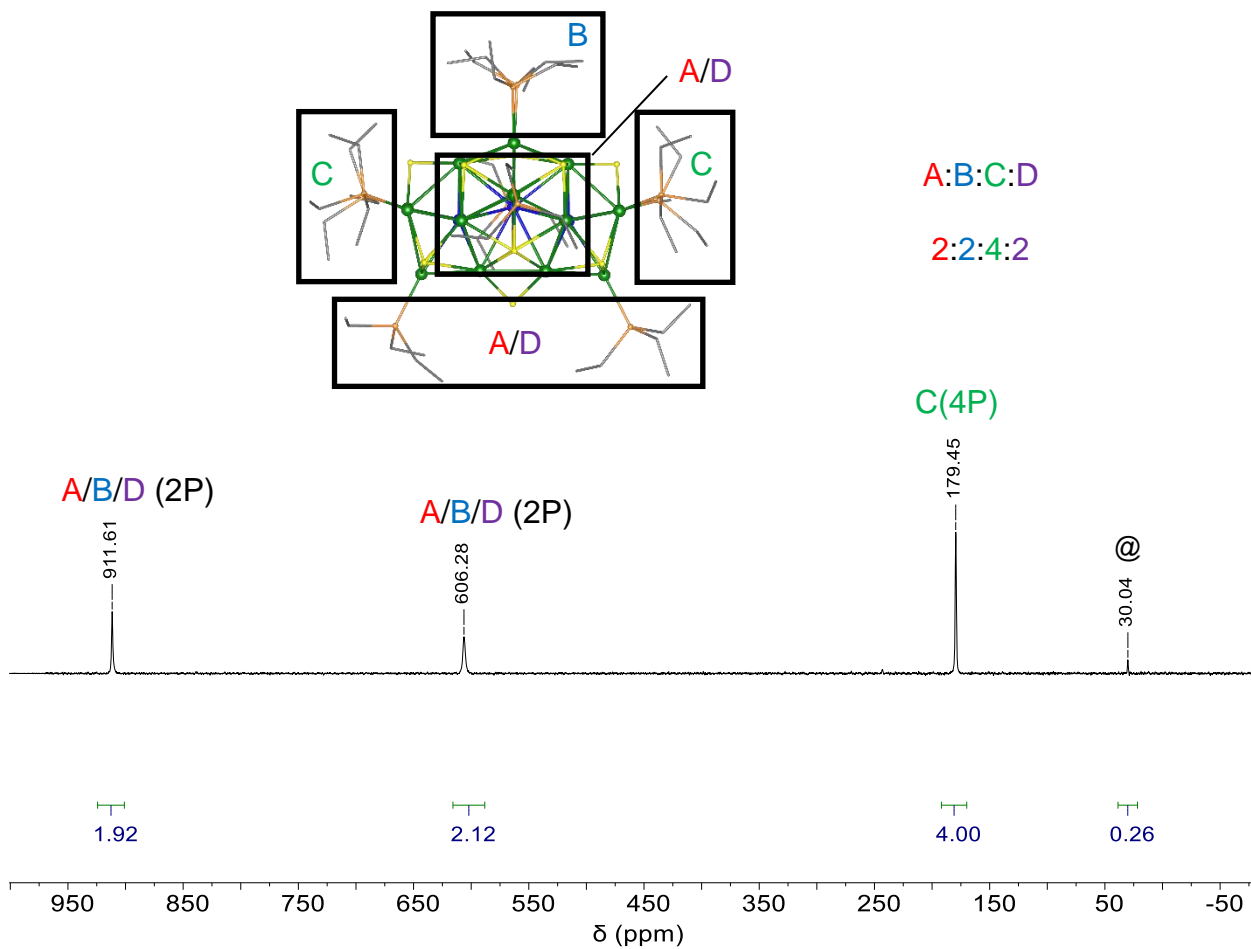

**Figure S 31.** Partial  $^{31}\text{P}\{^1\text{H}\}$  NMR (202 MHz, 25 °C, benzene- $d_6$ ) spectrum of  $[\text{Ni}_{26}\text{S}_{14}(\text{PEt}_3)_{10}]$  (**2**) from -65 ppm to 1000 ppm. (@) indicates a resonance assignable to **1**.

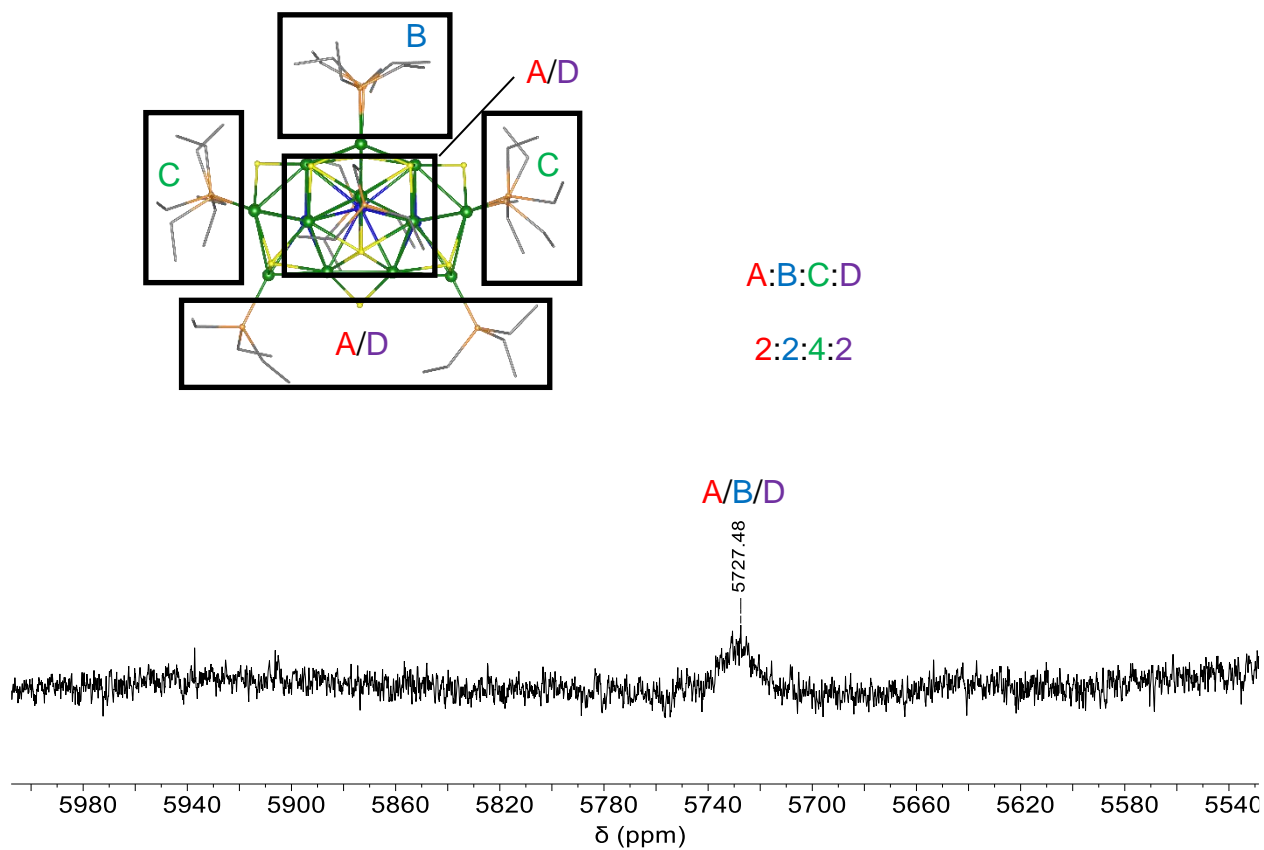

**Figure S 32.** Partial <sup>31</sup>P{<sup>1</sup>H} NMR (202 MHz, 25 °C, benzene-*d*<sub>6</sub>) spectrum of [Ni<sub>26</sub>S<sub>14</sub>(PEt<sub>3</sub>)<sub>10</sub>] (**2**) from 5540 ppm to 6000 ppm.

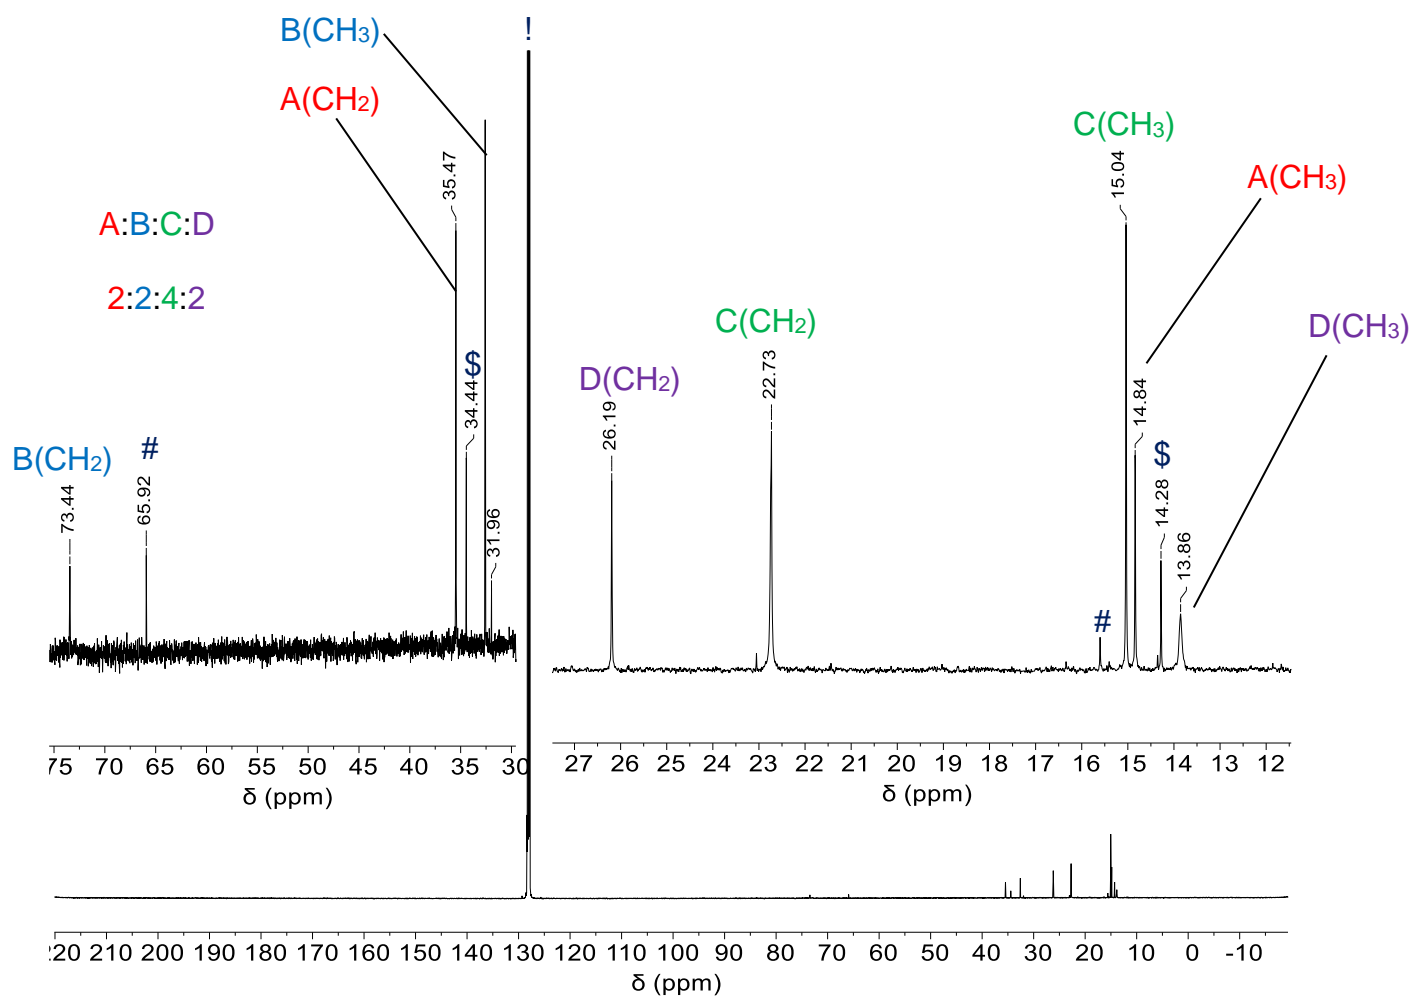

**Figure S33.**  $^{13}C\{^1H\}$  NMR (126 MHz, 25 °C, benzene- $d_6$ ) spectrum of 2. The inset above shows a partial  $^{13}C\{^1H\}$  NMR spectrum 0 to 49 ppm. (\$) indicates the presence of *n*-pentane.<sup>13</sup> (#) indicates the presence of silicone grease.<sup>13</sup> (!) indicates a resonance assignable to benzene- $d_6$ .<sup>13</sup>



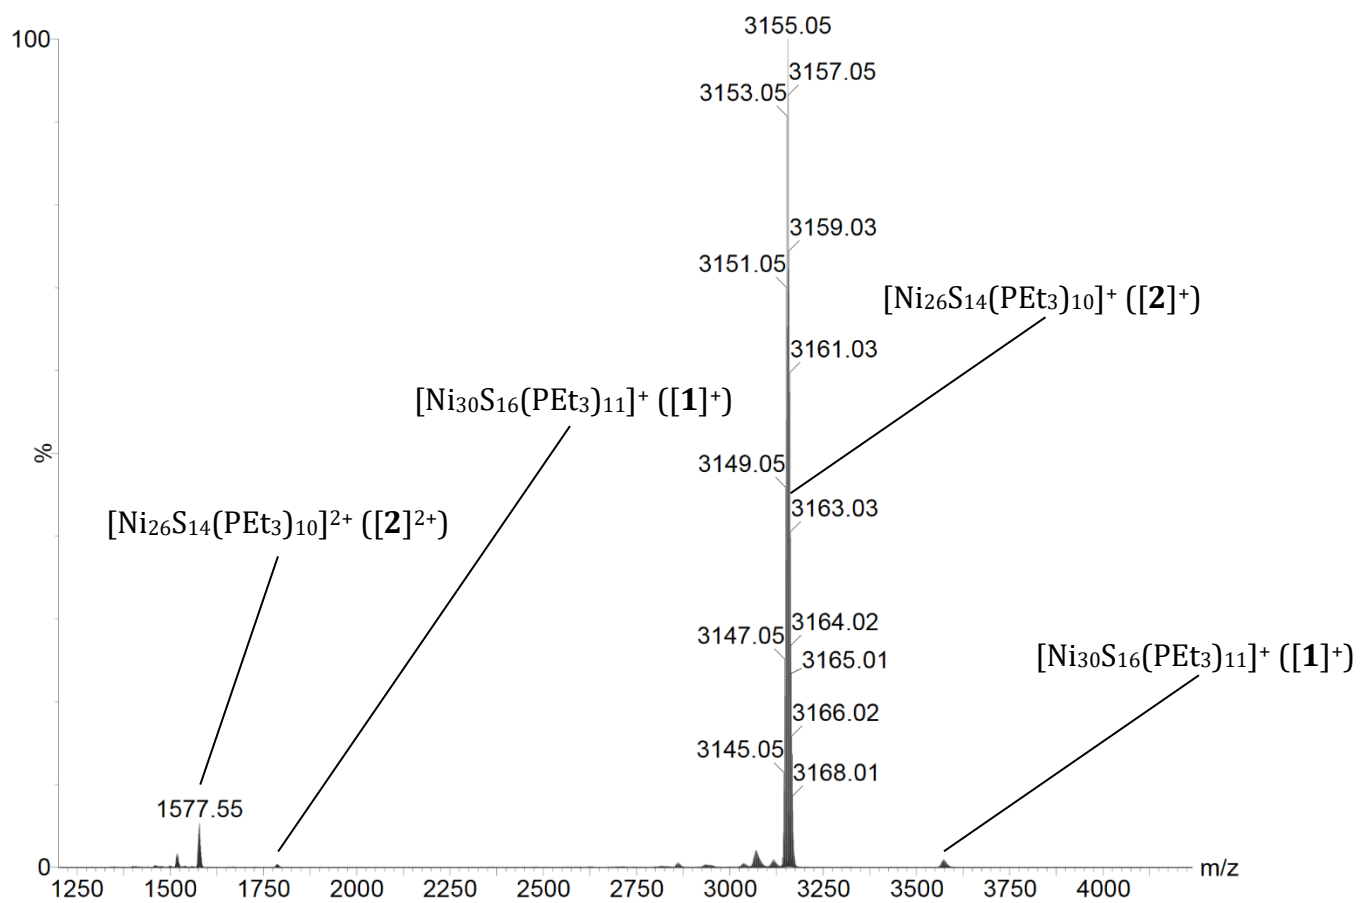

**Figure S34.** ESI-MS (positive ion mode) spectrum of  $[\text{Ni}_{26}\text{S}_{14}(\text{PEt}_3)_{10}]$  (**2**) taken in THF at a capillary voltage of 2.50 kV.

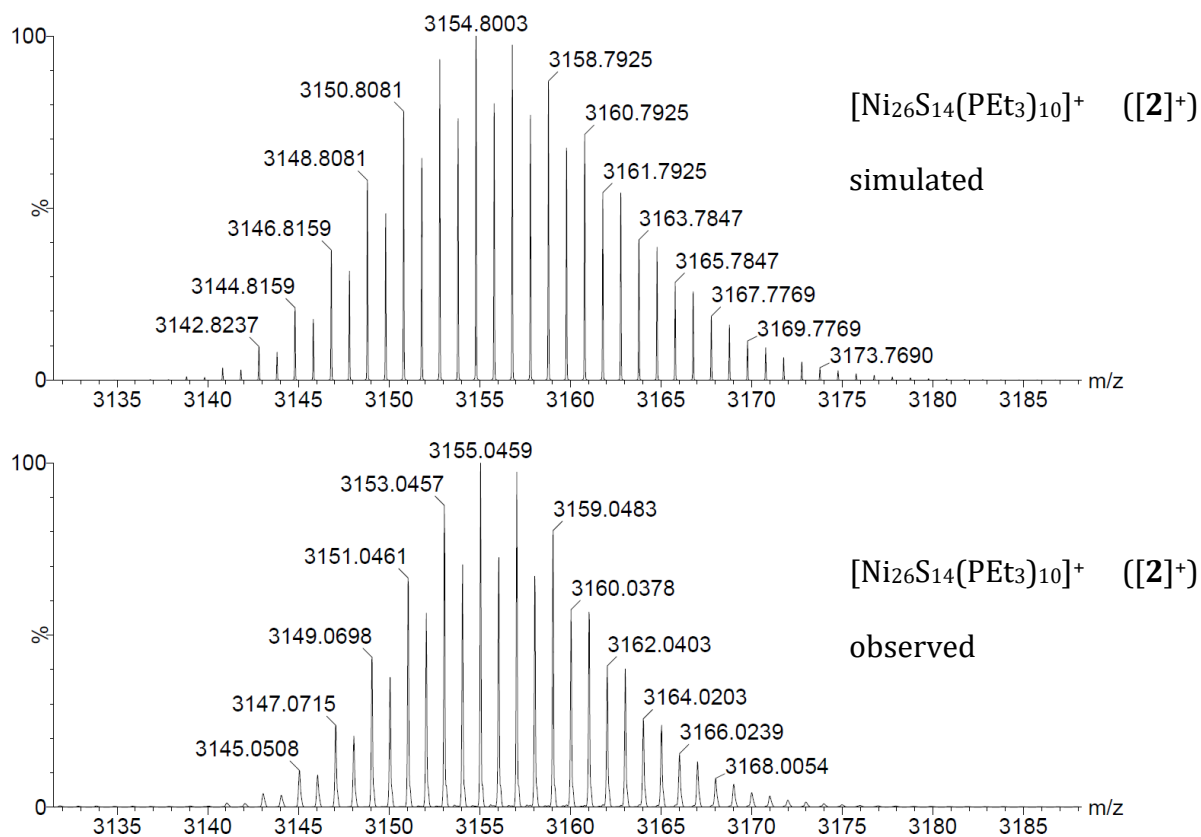

**Figure S35.** Partial ESI-MS (positive ion mode) spectrum of  $[\text{Ni}_{26}\text{S}_{14}(\text{PEt}_3)_{10}] \quad (2)$  taken in THF at a capillary voltage of 2.50 kV. Only the peak at 3155.05 m/z is displayed (bottom spectrum) with the simulated spectrum for  $[\text{Ni}_{26}\text{S}_{14}(\text{PEt}_3)_{10}]^+ \quad ([2]^+)$  displayed above (top spectrum).

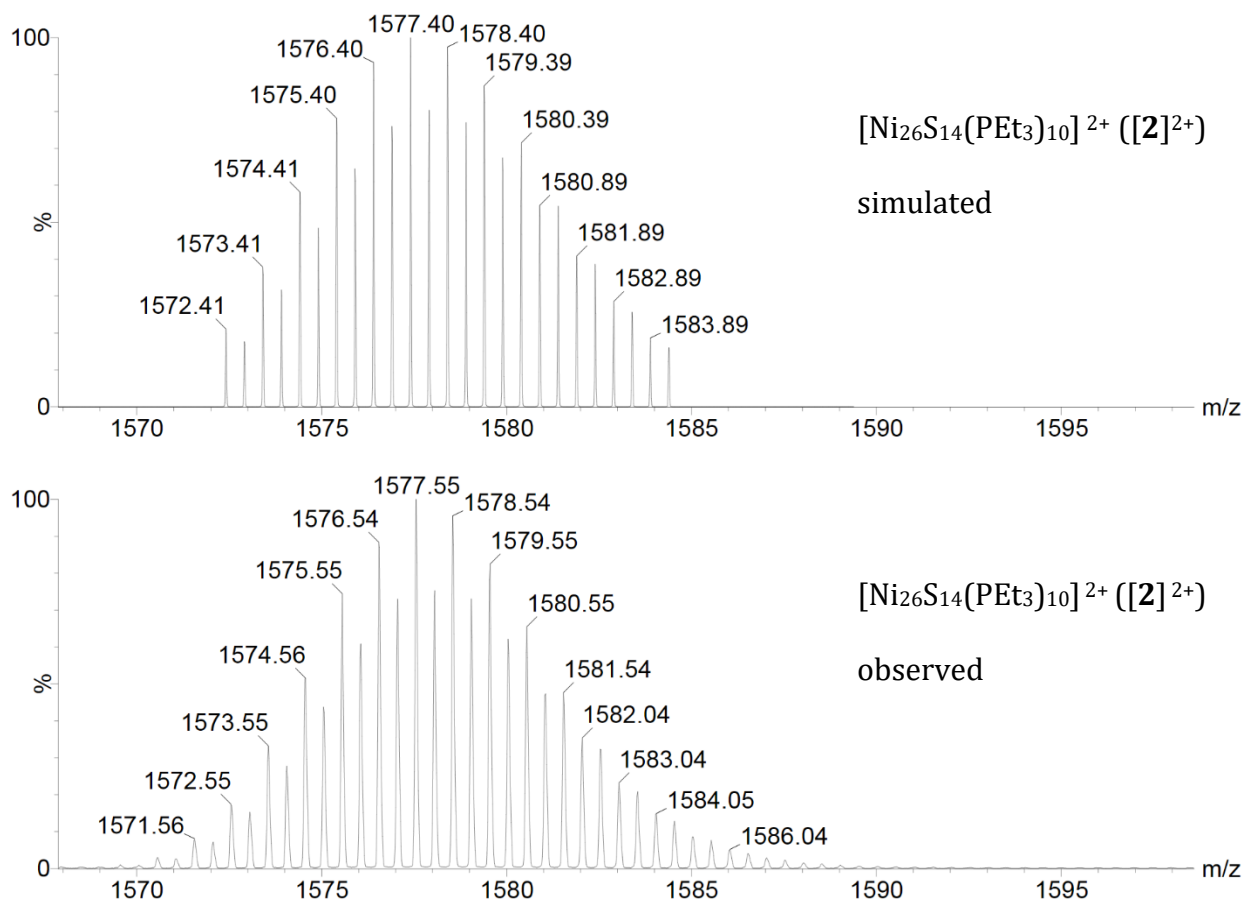

**Figure S36.** Partial ESI-MS (positive ion mode) spectrum of  $[\text{Ni}_{26}\text{S}_{14}(\text{PEt}_3)_{10}]$  ( $\mathbf{2}$ ) taken in THF at a capillary voltage of 2.50 kV. Only the peak at 1577.55  $m/z$  is displayed (bottom spectrum) with the simulated spectrum for  $[\text{Ni}_{26}\text{S}_{14}(\text{PEt}_3)_{10}]^{2+}$  ( $[\mathbf{2}]^{2+}$ ) displayed above (top spectrum).

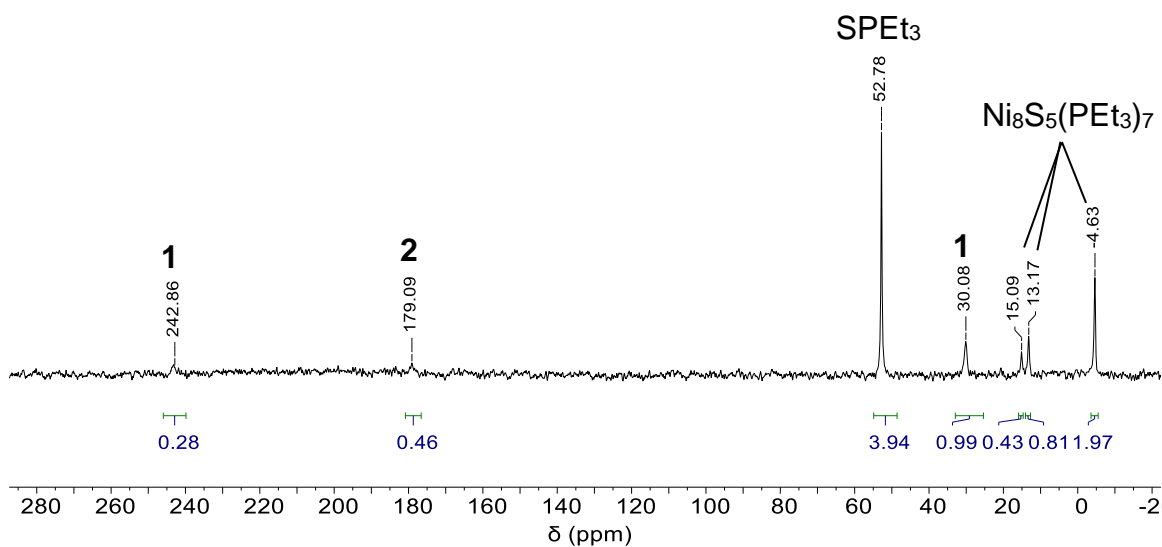

**Figure S37.**  $^{31}\text{P}\{^1\text{H}\}$  NMR (202 MHz, 25 °C, benzene-*d*<sub>6</sub>) spectrum of an aliquot taken from the reaction of [Ni(1,5-cod)<sub>2</sub>] (30 equiv), PEt<sub>3</sub> (31 equiv), and S<sub>8</sub> (1.9 equiv) after thermolysis at 95 °C for 5 h.  $^{31}\text{P}\{^1\text{H}\}$  NMR (202 MHz, C<sub>6</sub>D<sub>6</sub>):  $\delta$  242.86 (**1**, 2P), 179.09 (**2**, 4P), 52.78 (SPEt<sub>3</sub>), 30.08 (**1**, 4P), 15.09 (Ni<sub>8</sub>S<sub>5</sub>(PEt<sub>3</sub>)<sub>7</sub>, 1P), 13.17 (Ni<sub>8</sub>S<sub>5</sub>(PEt<sub>3</sub>)<sub>7</sub>, 2P), -4.63 (Ni<sub>8</sub>S<sub>5</sub>(PEt<sub>3</sub>)<sub>7</sub>, 4P).

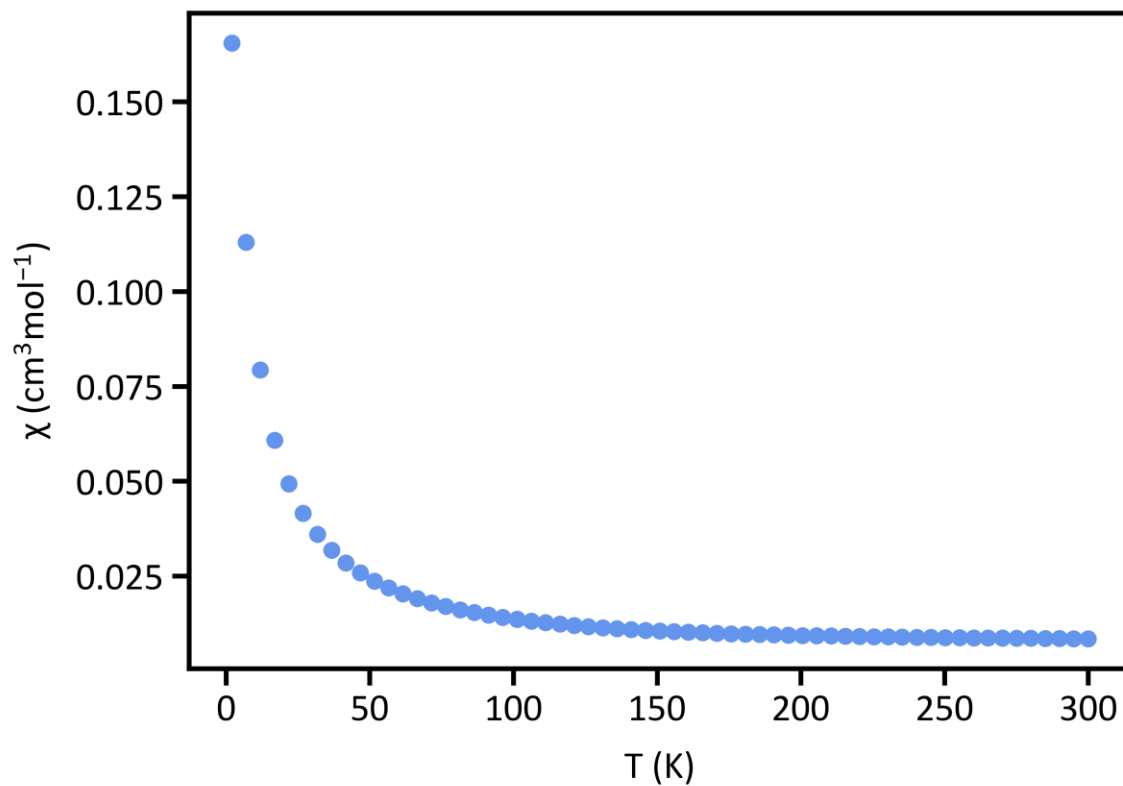

**Figure S38.** Variable-temperature magnetic susceptibility ( $\chi$ ) data for **1** collected at 1 T (10,000 Oe). For experimental details, see page S4.

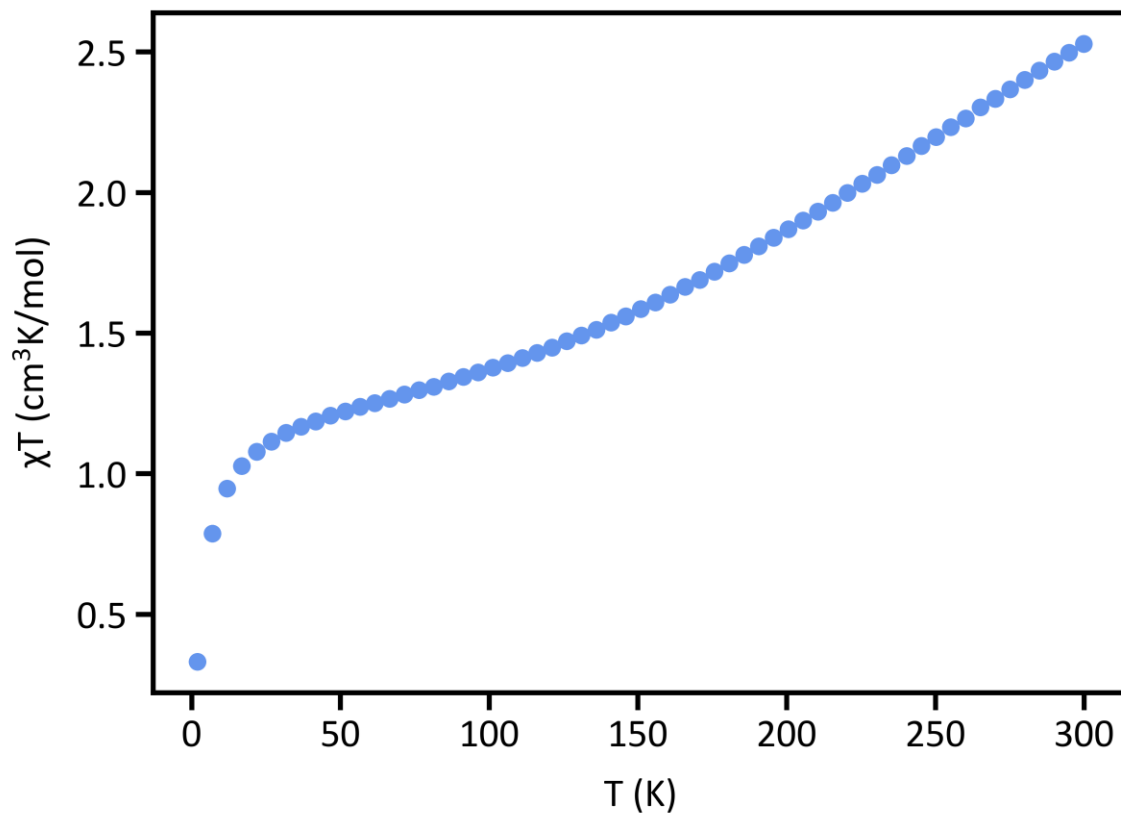

**Figure S39.** Variable-temperature magnetic susceptibility ( $\chi T$ ) data for **1** collected at 1 T (10,000 Oe). For experimental details, see page S4.

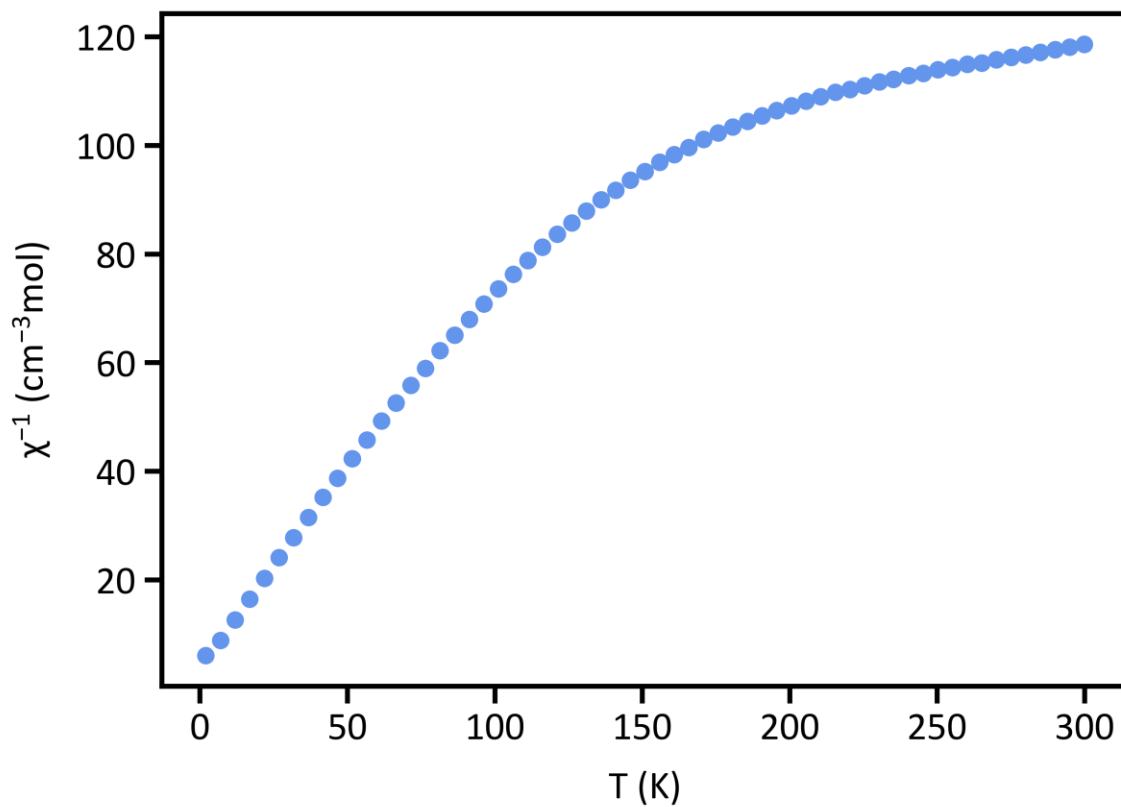

**Figure S40.** Variable-temperature magnetic susceptibility ( $\chi^{-1}$ ) data for **1** collected at 1 T (10,000 Oe). For experimental details, see page S4.

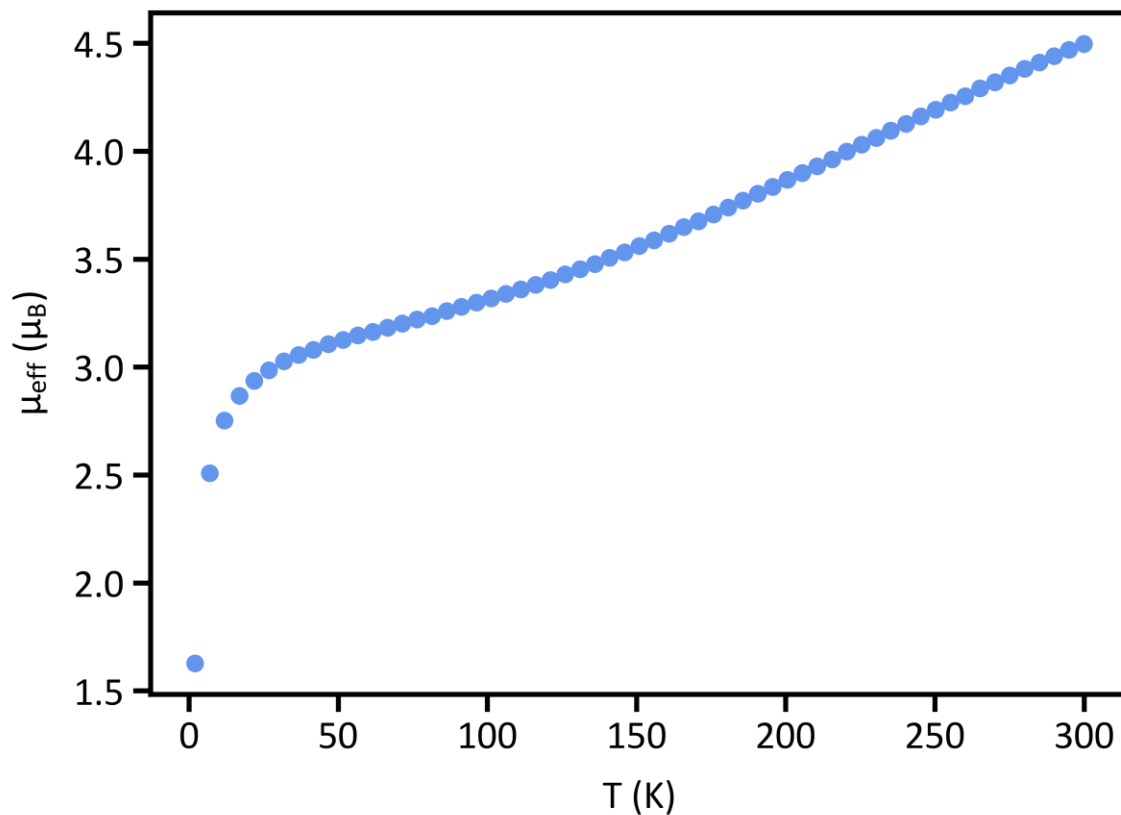

**Figure S41.** Effective magnetic moment of **1** collected at 1 T (10,000 Oe). For experimental details, see page S4.



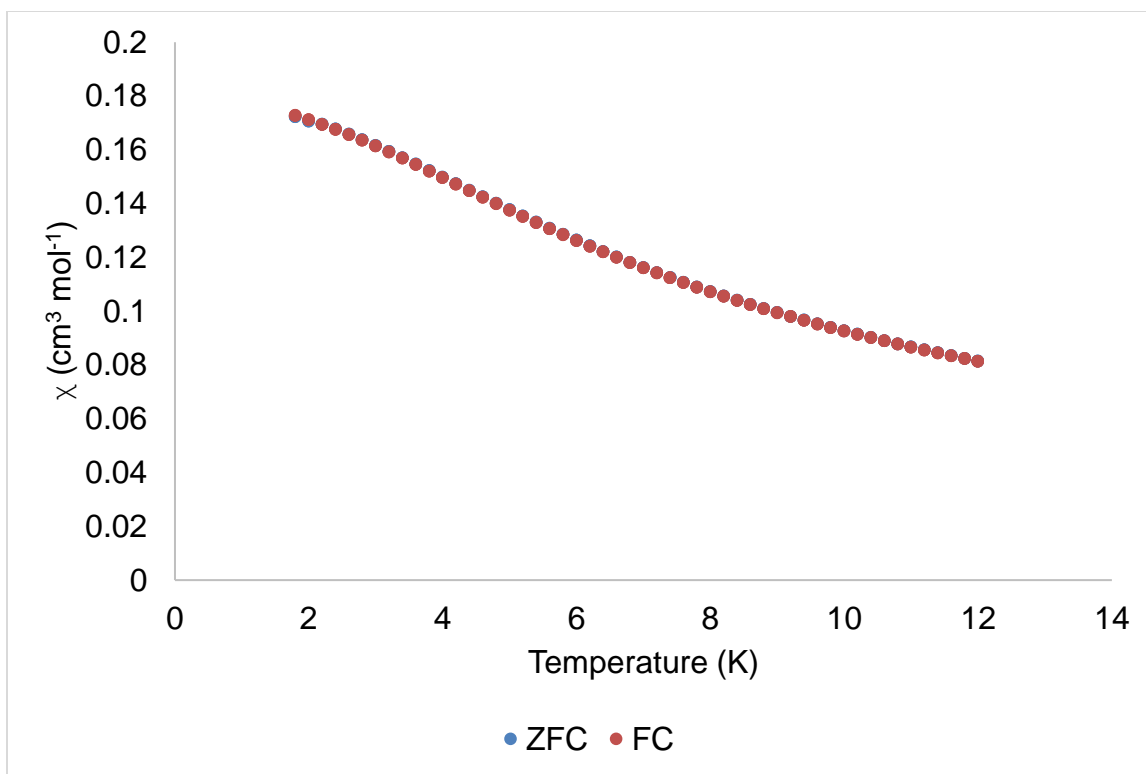

**Figure S42.** Zero-field cooled and field-cooled low-temperature susceptibility of **1** collected at 1 T (10,000 Oe) from 1.8 K to 12 K. For experimental details, see page S4.

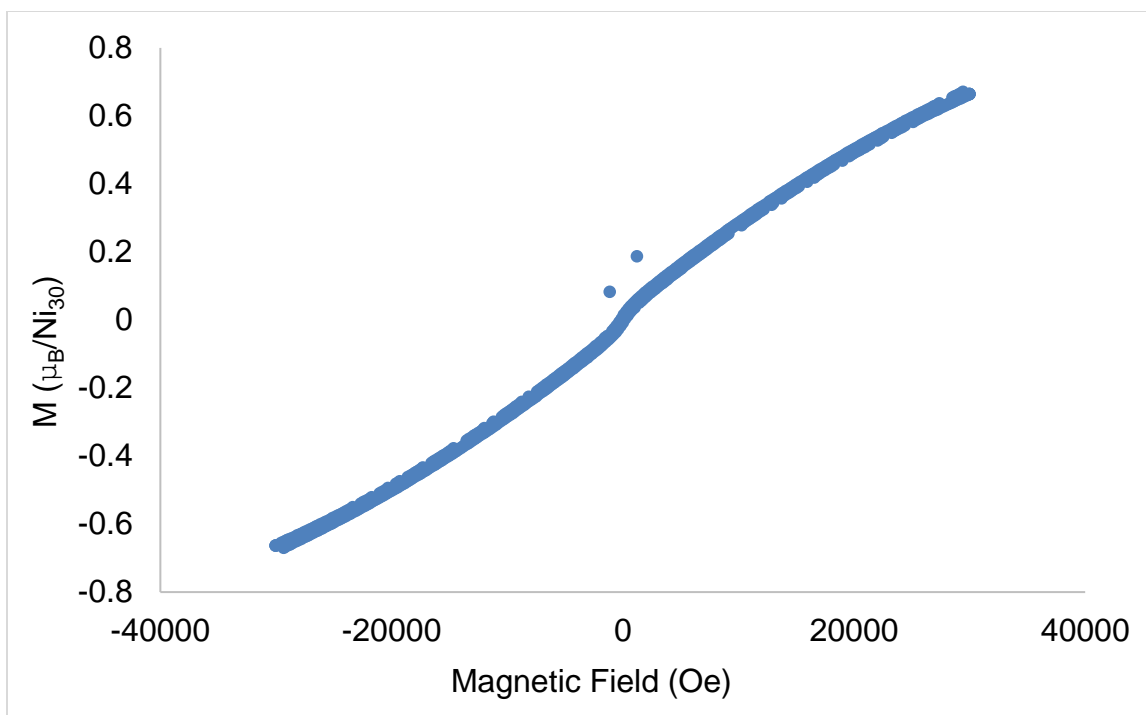

**Figure S43.** Magnetization versus magnetic field for **1** collected at 2 K from -40,000 Oe (-4 T) to 40,000 Oe (4 T) at a sweep rate of 200 Oe/s. For experimental details, see page S4.

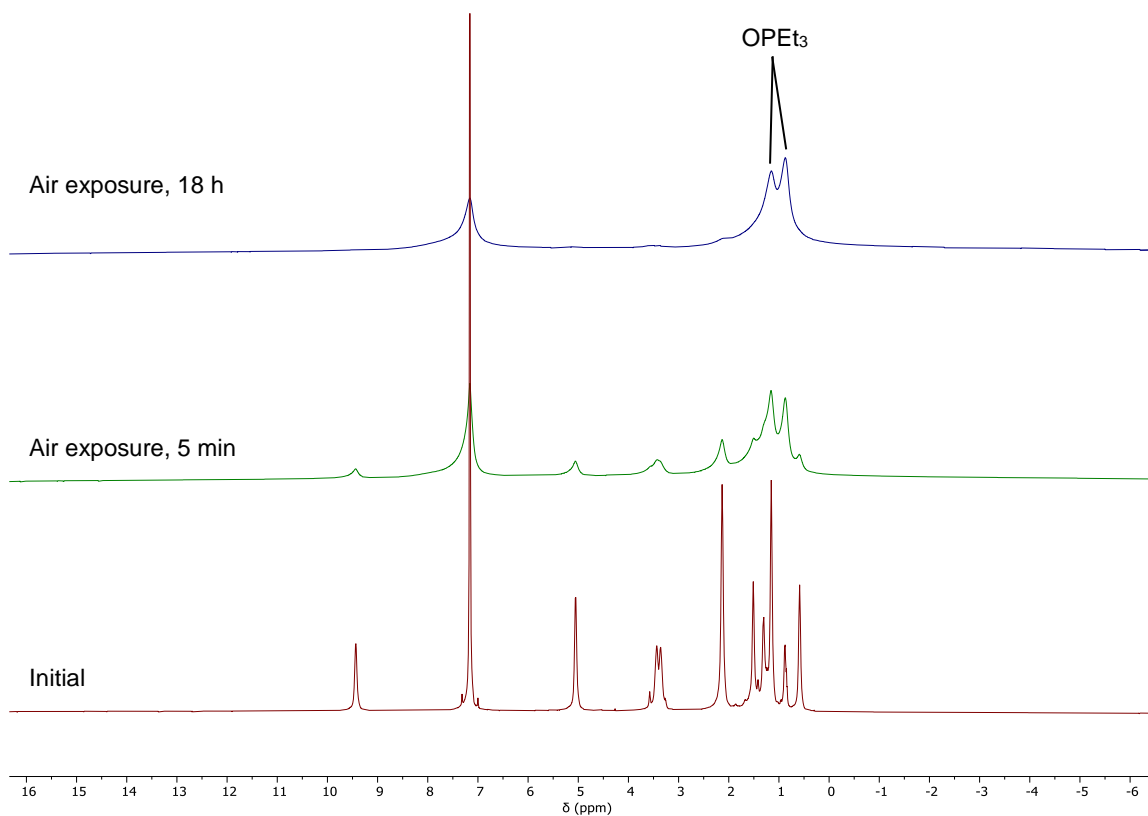

**Figure S44.**  $^1\text{H}$  NMR (25  $^\circ\text{C}$ , benzene- $d_6$ ) spectra of a solution of  $[\text{Ni}_{30}\text{S}_{16}(\text{PEt}_3)_{11}]$  (**1**) exposed to air. **Experimental Details:**  $[\text{Ni}_{30}\text{S}_{16}(\text{PEt}_3)_{11}]$  (**1**) (5 mg, 0.0014 mmol) was dissolved in benzene- $d_6$  (0.7 mL) and transferred to a borosilicate NMR tube and sealed. A  $^1\text{H}$  NMR spectrum was recorded for the sample. The NMR tube was then unsealed, exposed to air for 1 min, and re-sealed, whereupon dark solids began to deposit in the NMR tube, although no color change was noted. The  $^1\text{H}$  NMR spectrum was re-recorded. After 18 h, another  $^1\text{H}$  NMR spectrum was recorded.

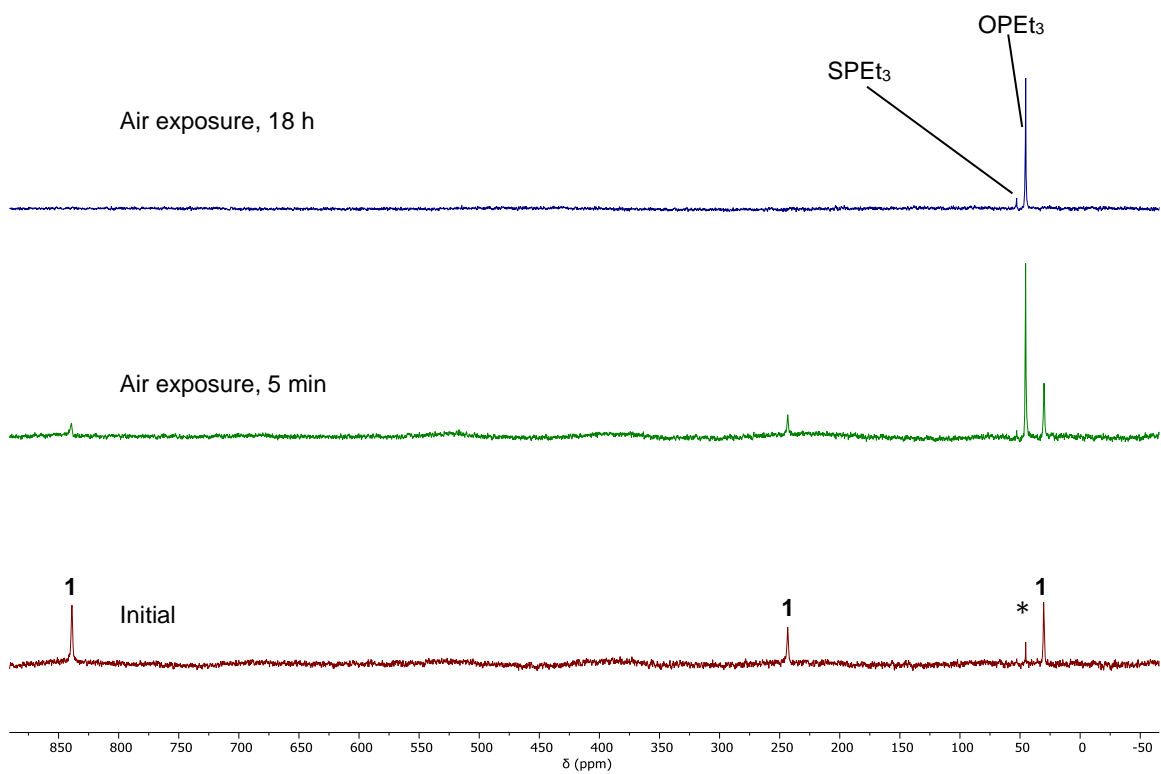

**Figure S45.**  $^{31}\text{P}\{^1\text{H}\}$  NMR (25 °C, benzene- $d_6$ ) spectra of a solution of  $[\text{Ni}_{30}\text{S}_{16}(\text{PEt}_3)_{11}]$  (**1**) exposed to air. **Experimental Details:** See Page S59. A small amount of  $\text{Et}_3\text{PO}$  was present as an impurity in this sample of **1** before exposure to air (\*).

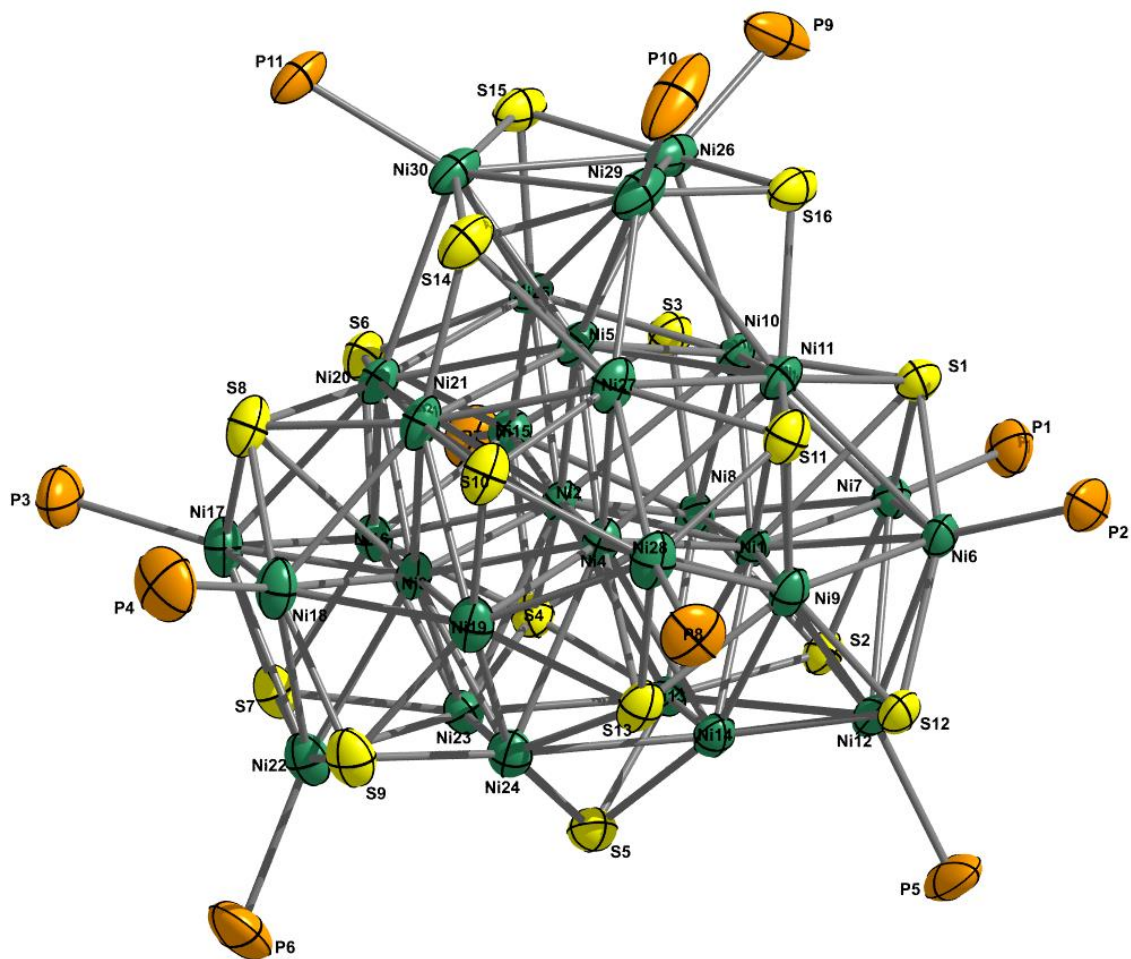

**Figure S46.** ORTEP diagram of  $[\text{Ni}_{30}\text{S}_{16}(\text{PEt}_3)_{11}] \cdot \text{OC}_4\text{H}_{10}$  (**1**·Et<sub>2</sub>O) with 50% thermal ellipsoids shown for non-carbon atoms. Hydrogen atoms, carbon atoms, and diethyl ether solvate are omitted for clarity.

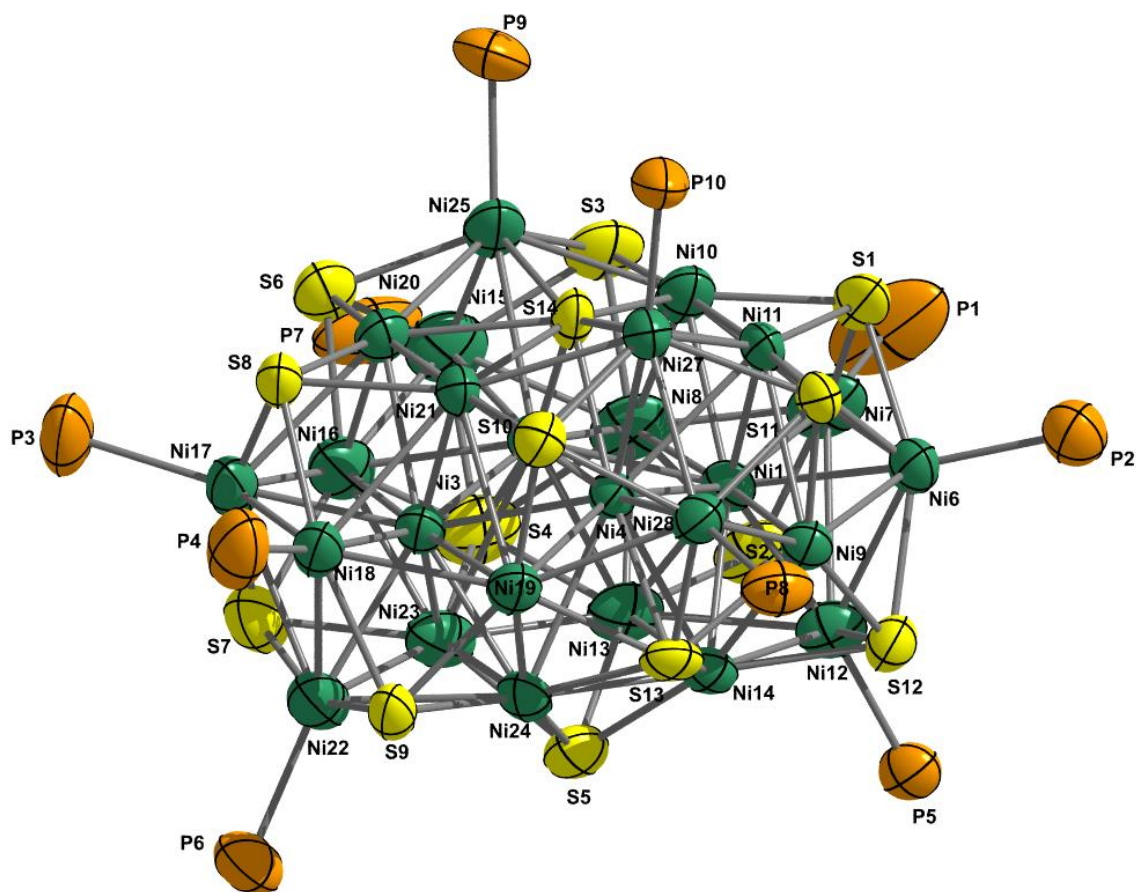

**Figure S47.** ORTEP diagram of  $[\text{Ni}_{26}\text{S}_{14}(\text{PET}_3)_{10}] \cdot \text{C}_5\text{H}_{12}$  ( $2 \cdot \text{C}_5\text{H}_{12}$ ) with 50% thermal ellipsoids shown for non-carbon atoms. Hydrogen atoms, carbon atoms, and diethyl ether solvate are omitted for clarity.

## References:

1. Harris, R. K.; Becker, E. D.; Cabral de Menezes, S. M.; Goodfellow, R.; Granger, P., NMR nomenclature. Nuclear spin properties and conventions for chemical shifts(IUPAC Recommendations 2001). *Pure Appl. Chem.* **2001**, *73* (11), 1795-1818.
2. Harris, R. K.; Becker, E. D.; Cabral de Menezes, S. M.; Granger, P.; Hoffman, R. E.; Zilm, K. W., Further conventions for NMR shielding and chemical shifts (IUPAC Recommendations 2008). *Pure Appl. Chem.* **2008**, *80* (1), 59-84.
3. Bain, G. A.; Berry, J. F., Diamagnetic Corrections and Pascal's Constants. *J. Chem. Educ.* **2008**, *85* (4), 532.
4. Cronin, L.; Higgitt, C. L.; Karch, R.; Perutz, R. N., Rapid Intermolecular Carbon–Fluorine Bond Activation of Pentafluoropyridine at Nickel(0): Comparative Reactivity of Fluorinated Arene and Fluorinated Pyridine Derivatives. *Organometallics* **1997**, *16* (22), 4920-4928.
5. SDBS <sup>1</sup>H NMR, 1,5-cyclooctadiene. In *SDBS <sup>1</sup>H NMR, 1,5-cyclooctadiene*, SDBSWeb : <https://sdb.sdb.aist.go.jp> (National Institute of Advanced Industrial Science and Technology): 1999.
6. Britovsek, G. J. P.; Ugolotti, J.; White, A. J. P., From B(C<sub>6</sub>F<sub>5</sub>)<sub>3</sub> to B(OC<sub>6</sub>F<sub>5</sub>)<sub>3</sub>: Synthesis of (C<sub>6</sub>F<sub>5</sub>)<sub>2</sub>BOC<sub>6</sub>F<sub>5</sub> and C<sub>6</sub>F<sub>5</sub>B(OC<sub>6</sub>F<sub>5</sub>)<sub>2</sub> and Their Relative Lewis Acidity. *Organometallics* **2005**, *24* (7), 1685-1691.
7. Baccolini, G.; Boga, C.; Mazzacurati, M., Highly Atom-Economic One-Pot Formation of Three Different C–P Bonds: General Synthesis of Acyclic Tertiary Phosphine Sulfides. *J. Org. Chem.* **2005**, *70* (12), 4774-4777.
8. *SMART Apex II, Version 2.1*. Bruker AXS Inc.: Madison, WI, 2005.
9. *SAINT Software User's Guide, Version 7.34a*. Bruker AXS Inc.: Madison, WI, 2005.
10. Sheldrick, G. M., *SADABS*. University of Göttingen: Göttingen, Germany, 2005.
11. *SHELXTL PC, Version 6.12*. Bruker AXS Inc.: Madison, WI, 2005.
12. Momma, K.; Izumi, F., VESTA 3 for three-dimensional visualization of crystal, volumetric and morphology data. *J. Appl. Crystallogr.* **2011**, *44* (6), 1272-1276.
13. Fulmer, G. R.; Miller, A. J. M.; Sherden, N. H.; Gottlieb, H. E.; Nudelman, A.; Stoltz, B. M.; Bercaw, J. E.; Goldberg, K. I., NMR Chemical Shifts of Trace Impurities: Common Laboratory Solvents, Organics, and Gases in Deuterated Solvents Relevant to the Organometallic Chemist. *Organometallics* **2010**, *29* (9), 2176-2179.
